# Supplementary material
Source: publisher figshare collection journal article supplement (https://acs.figshare.com/ndownloader/files/3899206)
Supplement: Supplementary file 1 [file 3899206]

 
data_1new 
 
_audit_creation_method            SHELXL-97 
_chemical_name_systematic 
; 
 ? 
; 
_chemical_name_common             ? 
_chemical_melting_point           ? 
_chemical_formula_moiety          
 'C22 H33 Cl Cu2 N5 O4, 0.5(N O3), 0.5(N O3), 0.5(H2 O), 0.5(H2 O)'   
_chemical_formula_sum 
 'C22 H35 Cl Cu2 N6 O9' 
_chemical_formula_weight          690.09 
 
loop_ 
 _atom_type_symbol 
 _atom_type_description 
 _atom_type_scat_dispersion_real 
 _atom_type_scat_dispersion_imag 
 _atom_type_scat_source 
 'C'  'C'   0.0033   0.0016 
 'International Tables Vol C Tables 4.2.6.8 and 6.1.1.4' 
 'H'  'H'   0.0000   0.0000 
 'International Tables Vol C Tables 4.2.6.8 and 6.1.1.4' 
 'N'  'N'   0.0061   0.0033 
 'International Tables Vol C Tables 4.2.6.8 and 6.1.1.4' 
 'O'  'O'   0.0106   0.0060 
 'International Tables Vol C Tables 4.2.6.8 and 6.1.1.4' 
 'Cl'  'Cl'   0.1484   0.1585 
 'International Tables Vol C Tables 4.2.6.8 and 6.1.1.4' 
 'Cu'  'Cu'   0.3201   1.2651 
 'International Tables Vol C Tables 4.2.6.8 and 6.1.1.4' 
 
_symmetry_cell_setting            'triclinic' 
_symmetry_space_group_name_H-M    'P -1'  
 
loop_ 
 _symmetry_equiv_pos_as_xyz 
 'x, y, z' 
 '-x, -y, -z' 
 
_cell_length_a                    9.531(6) 
_cell_length_b                    12.534(6) 
_cell_length_c                    13.472(7) 
_cell_angle_alpha                 100.526(5) 
_cell_angle_beta                  103.720(5) 
_cell_angle_gamma                 106.472(4) 
_cell_volume                      1444.3(13) 
_cell_formula_units_Z             2 
_cell_measurement_temperature     296(2) 
_cell_measurement_reflns_used     ? 
_cell_measurement_theta_min       ? 
_cell_measurement_theta_max       ? 
 
_exptl_crystal_description        'needle' 
_exptl_crystal_colour             'green' 
_exptl_crystal_size_max           0.35
_exptl_crystal_size_mid           0.13
_exptl_crystal_size_min           0.12
_exptl_crystal_density_meas       ? 
_exptl_crystal_density_diffrn     1.587 
_exptl_crystal_density_method     'not measured' 
_exptl_crystal_F_000              712 
_exptl_absorpt_coefficient_mu     1.623 
_exptl_absorpt_correction_type    'MULTI-SCAN'
_exptl_absorpt_correction_T_min      0.5331
_exptl_absorpt_correction_T_max      0.9602 
_exptl_absorpt_process_details    'BRUKER SADABS'
 
_exptl_special_details 
; 
 ? 
; 
 
_diffrn_ambient_temperature       296(2) 
_diffrn_radiation_wavelength      0.71073 
_diffrn_radiation_type            MoK\a 
_diffrn_radiation_source          'fine-focus sealed tube'
_diffrn_radiation_monochromator   graphite 
_diffrn_measurement_device_type   'BRUKER SMART APEX CCD DIFFRACTOMETER' 
_diffrn_measurement_method        'OMEGA-PHI SCAN' 
_diffrn_detector_area_resol_mean  ? 
_diffrn_standards_number          ? 
_diffrn_standards_interval_count  ? 
_diffrn_standards_interval_time   ? 
_diffrn_standards_decay_%         ? 
_diffrn_reflns_number             7223 
_diffrn_reflns_av_R_equivalents   0.0510 
_diffrn_reflns_av_sigmaI/netI     0.0925  
_diffrn_reflns_limit_h_min        -10 
_diffrn_reflns_limit_h_max        10 
_diffrn_reflns_limit_k_min        -10 
_diffrn_reflns_limit_k_max        14 
_diffrn_reflns_limit_l_min        -15 
_diffrn_reflns_limit_l_max        14  
_diffrn_reflns_theta_min          1.62 
_diffrn_reflns_theta_max          23.56 
_reflns_number_total              4207 
_reflns_number_gt                 2450 
_reflns_threshold_expression      >2sigma(I) 
 
_computing_data_collection        'BRUKER SMART' 
_computing_cell_refinement        'BRUKER SMART' 
_computing_data_reduction         'BRUKER SAINT' 
_computing_structure_solution     'SHELX97 (Sheldrick, 2008)'
_computing_structure_refinement   'SHELX97 (Sheldrick, 2008)'
_computing_molecular_graphics     'Ortep3 for Windows (Farrugia,1997)'
_computing_publication_material   'Wingx 1.80.05 (Farrugia, 1999)' 
 
_refine_special_details 
; 
 Refinement of F^2^ against ALL reflections.  The weighted R-factor wR and 
 goodness of fit S are based on F^2^, conventional R-factors R are based 
 on F, with F set to zero for negative F^2^. The threshold expression of 
 F^2^ > 2sigma(F^2^) is used only for calculating R-factors(gt) etc. and is 
 not relevant to the choice of reflections for refinement.  R-factors based 
 on F^2^ are statistically about twice as large as those based on F, and R- 
 factors based on ALL data will be even larger. 

 NOTE: Hydrogen atoms not located for O1w and O2w
; 
 
_refine_ls_structure_factor_coef  Fsqd  
_refine_ls_matrix_type            full 
_refine_ls_weighting_scheme       calc  
_refine_ls_weighting_details 
 'calc w=1/[\s^2^(Fo^2^)+(0.0350P)^2^+14.6000P] where P=(Fo^2^+2Fc^2^)/3' 
_atom_sites_solution_primary      direct 
_atom_sites_solution_secondary    difmap 
_atom_sites_solution_hydrogens    geom 
_refine_ls_hydrogen_treatment     constr 
_refine_ls_extinction_method      none 
_refine_ls_extinction_coef        ? 
_refine_ls_number_reflns          4207 
_refine_ls_number_parameters      388 
_refine_ls_number_restraints      0 
_refine_ls_R_factor_all           0.1206 
_refine_ls_R_factor_gt            0.0757 
_refine_ls_wR_factor_ref          0.1880 
_refine_ls_wR_factor_gt           0.1462 
_refine_ls_goodness_of_fit_ref    1.090 
_refine_ls_restrained_S_all       1.090 
_refine_ls_shift/su_max           0.000 
_refine_ls_shift/su_mean          0.000 
 
loop_ 
 _atom_site_label 
 _atom_site_type_symbol 
 _atom_site_fract_x 
 _atom_site_fract_y 
 _atom_site_fract_z 
 _atom_site_U_iso_or_equiv 
 _atom_site_adp_type 
 _atom_site_occupancy 
 _atom_site_symmetry_multiplicity 
 _atom_site_calc_flag 
 _atom_site_refinement_flags 
 _atom_site_disorder_assembly 
 _atom_site_disorder_group 
Cu1 Cu 0.34515(15) 0.26850(12) 0.22582(11) 0.0506(4) Uani 1 1 d . . . 
Cu2 Cu 0.48084(15) 0.09400(12) 0.27727(11) 0.0494(4) Uani 1 1 d . . . 
Cl1 Cl -0.3406(4) -0.2507(3) 0.0579(3) 0.0859(12) Uani 1 1 d . . . 
O1 O 0.2792(7) 0.0960(6) 0.1968(5) 0.0409(17) Uani 1 1 d . . . 
O2 O 0.5438(7) 0.2520(6) 0.2679(6) 0.0498(19) Uani 1 1 d . . . 
H2 H 0.5777 0.2379 0.2158 0.060 Uiso 1 1 d R . . 
N1 N 0.1341(9) 0.2562(8) 0.1579(7) 0.046(2) Uani 1 1 d . . . 
N2 N 0.3901(10) -0.0708(8) 0.2654(6) 0.046(2) Uani 1 1 d . . . 
N3 N 0.3958(10) 0.4471(7) 0.2494(7) 0.047(2) Uani 1 1 d . . . 
N4 N 0.6884(9) 0.0785(7) 0.3518(6) 0.042(2) Uani 1 1 d . . . 
C1 C 0.1415(11) 0.0201(9) 0.1695(7) 0.037(2) Uani 1 1 d . . . 
C2 C 0.0053(11) 0.0483(9) 0.1270(8) 0.043(3) Uani 1 1 d . . . 
C3 C -0.1380(12) -0.0371(10) 0.0935(8) 0.049(3) Uani 1 1 d . . . 
H3 H -0.2249 -0.0189 0.0664 0.059 Uiso 1 1 calc R . . 
C4 C -0.1550(13) -0.1492(10) 0.0996(9) 0.057(3) Uani 1 1 d . . . 
C5 C -0.0289(13) -0.1788(10) 0.1405(9) 0.059(3) Uani 1 1 d . . . 
H5 H -0.0424 -0.2539 0.1457 0.071 Uiso 1 1 calc R . . 
C6 C 0.1216(12) -0.0957(9) 0.1749(8) 0.047(3) Uani 1 1 d . . . 
C7 C 0.2502(12) -0.1346(9) 0.2218(8) 0.045(3) Uani 1 1 d . . . 
H7 H 0.2259 -0.2127 0.2188 0.054 Uiso 1 1 calc R . . 
C8 C 0.0162(13) 0.1651(10) 0.1227(8) 0.051(3) Uani 1 1 d . . . 
H8 H -0.0754 0.1745 0.0899 0.061 Uiso 1 1 calc R . . 
C9 C 0.1164(15) 0.3677(11) 0.1545(10) 0.070(4) Uani 1 1 d . . . 
H9A H 0.0164 0.3669 0.1600 0.084 Uiso 1 1 calc R . . 
H9B H 0.1257 0.3849 0.0886 0.084 Uiso 1 1 calc R . . 
C10 C 0.2411(15) 0.4556(11) 0.2466(12) 0.078(4) Uani 1 1 d . . . 
H10A H 0.2203 0.4447 0.3119 0.093 Uiso 1 1 calc R . . 
H10B H 0.2420 0.5322 0.2423 0.093 Uiso 1 1 calc R . . 
C11 C 0.4502(14) 0.4928(10) 0.1662(9) 0.059(3) Uani 1 1 d . . . 
H11A H 0.4506 0.5714 0.1747 0.071 Uiso 1 1 calc R . . 
H11B H 0.3792 0.4468 0.0971 0.071 Uiso 1 1 calc R . . 
C12 C 0.6118(15) 0.4913(10) 0.1708(10) 0.068(4) Uani 1 1 d . . . 
H12A H 0.6114 0.4125 0.1596 0.081 Uiso 1 1 calc R . . 
H12B H 0.6427 0.5214 0.1149 0.081 Uiso 1 1 calc R . . 
C13 C 0.7249(16) 0.5642(12) 0.2777(11) 0.082(4) Uani 1 1 d . . . 
H13A H 0.7330 0.6444 0.2855 0.098 Uiso 1 1 calc R . . 
H13B H 0.8256 0.5590 0.2818 0.098 Uiso 1 1 calc R . . 
C14 C 0.6730(14) 0.5235(11) 0.3676(10) 0.070(4) Uani 1 1 d . . . 
H14A H 0.6802 0.4476 0.3662 0.084 Uiso 1 1 calc R . . 
H14B H 0.7407 0.5762 0.4351 0.084 Uiso 1 1 calc R . . 
C15 C 0.5094(13) 0.5180(10) 0.3573(9) 0.063(3) Uani 1 1 d . . . 
H15A H 0.5065 0.5959 0.3702 0.076 Uiso 1 1 calc R . . 
H15B H 0.4774 0.4851 0.4115 0.076 Uiso 1 1 calc R . . 
C16 C 0.4981(13) -0.1234(11) 0.3082(9) 0.060(3) Uani 1 1 d . . . 
H16A H 0.4709 -0.2011 0.2642 0.072 Uiso 1 1 calc R . . 
H16B H 0.4974 -0.1275 0.3792 0.072 Uiso 1 1 calc R . . 
C17 C 0.6513(13) -0.0516(10) 0.3104(9) 0.059(3) Uani 1 1 d . . . 
H17A H 0.6592 -0.0677 0.2391 0.071 Uiso 1 1 calc R . . 
H17B H 0.7280 -0.0741 0.3546 0.071 Uiso 1 1 calc R . . 
C18 C 0.8289(13) 0.1459(11) 0.3308(10) 0.063(3) Uani 1 1 d . . . 
H18A H 0.8070 0.1344 0.2548 0.076 Uiso 1 1 calc R . . 
H18B H 0.9094 0.1149 0.3544 0.076 Uiso 1 1 calc R . . 
C19 C 0.8896(13) 0.2748(11) 0.3834(11) 0.068(4) Uani 1 1 d . . . 
H19A H 0.8173 0.3093 0.3515 0.081 Uiso 1 1 calc R . . 
H19B H 0.9864 0.3095 0.3709 0.081 Uiso 1 1 calc R . . 
C20 C 0.9139(14) 0.3010(12) 0.5021(10) 0.076(4) Uani 1 1 d . . . 
H20A H 0.9382 0.3830 0.5319 0.091 Uiso 1 1 calc R . . 
H20B H 0.9985 0.2788 0.5368 0.091 Uiso 1 1 calc R . . 
C21 C 0.7646(15) 0.2318(11) 0.5193(11) 0.075(4) Uani 1 1 d . . . 
H21A H 0.7790 0.2452 0.5948 0.090 Uiso 1 1 calc R . . 
H21B H 0.6833 0.2596 0.4893 0.090 Uiso 1 1 calc R . . 
C22 C 0.7160(13) 0.1043(11) 0.4698(9) 0.061(3) Uani 1 1 d . . . 
H22A H 0.6226 0.0647 0.4840 0.073 Uiso 1 1 calc R . . 
H22B H 0.7954 0.0755 0.5014 0.073 Uiso 1 1 calc R . . 
N5 N 0.3030(11) 0.1976(8) 0.4397(7) 0.053(2) Uani 1 1 d . . . 
O3 O 0.2946(10) 0.2721(8) 0.3894(6) 0.072(2) Uani 1 1 d . . . 
O4 O 0.3914(10) 0.1408(8) 0.4293(6) 0.071(2) Uani 1 1 d . . . 
O5 O 0.2281(13) 0.1833(9) 0.5017(9) 0.102(4) Uani 1 1 d . . . 
N6 N 0.590(3) 0.105(2) 0.0411(17) 0.061(6) Uani 0.50 1 d P A 1 
O6 O 0.518(2) 0.035(2) 0.0848(14) 0.078(5) Uani 0.50 1 d P . 1 
O7 O 0.568(3) 0.066(3) -0.0530(19) 0.116(8) Uani 0.50 1 d P . 1 
O8 O 0.6612(10) 0.2018(10) 0.0857(8) 0.076(3) Uani 0.50 1 d P A 1 
N7 N -0.134(4) 0.425(2) -0.026(2) 0.077(7) Uani 0.50 1 d P B 1 
O9 O -0.040(4) 0.4321(19) -0.0767(18) 0.093(6) Uani 0.50 1 d P . 1 
O10 O -0.108(3) 0.507(2) 0.0533(19) 0.096(6) Uani 0.50 1 d P . 1 
O11 O -0.2489(15) 0.3454(11) -0.0516(9) 0.110(4) Uani 0.50 1 d P B 1 
O1W O 0.6612(10) 0.2018(10) 0.0857(8) 0.076(3) Uani 0.50 1 d P C 2 
O2W O -0.2489(15) 0.3454(11) -0.0516(9) 0.110(4) Uani 0.50 1 d P D 2 
 
loop_ 
 _atom_site_aniso_label 
 _atom_site_aniso_U_11 
 _atom_site_aniso_U_22 
 _atom_site_aniso_U_33 
 _atom_site_aniso_U_23 
 _atom_site_aniso_U_13 
 _atom_site_aniso_U_12 
Cu1 0.0449(8) 0.0533(9) 0.0504(9) 0.0146(7) 0.0079(6) 0.0174(7) 
Cu2 0.0445(8) 0.0508(9) 0.0497(9) 0.0125(7) 0.0073(6) 0.0180(7) 
Cl1 0.0530(19) 0.058(2) 0.111(3) -0.0094(19) 0.0007(19) 0.0063(16) 
O1 0.029(4) 0.042(4) 0.053(4) 0.019(3) 0.006(3) 0.016(3) 
O2 0.036(4) 0.047(5) 0.068(5) 0.019(4) 0.012(4) 0.018(3) 
N1 0.031(5) 0.053(6) 0.050(6) 0.006(4) 0.004(4) 0.020(5) 
N2 0.040(5) 0.061(6) 0.032(5) 0.005(4) -0.002(4) 0.025(5) 
N3 0.050(5) 0.045(5) 0.044(5) 0.021(4) 0.006(4) 0.017(4) 
N4 0.029(4) 0.058(6) 0.045(5) 0.017(4) 0.013(4) 0.020(4) 
C1 0.034(6) 0.050(7) 0.022(5) 0.003(4) 0.010(4) 0.010(5) 
C2 0.042(6) 0.053(7) 0.035(6) 0.007(5) 0.016(5) 0.018(5) 
C3 0.036(6) 0.062(8) 0.038(6) 0.003(5) 0.009(5) 0.010(6) 
C4 0.054(7) 0.053(8) 0.051(7) -0.004(6) 0.010(6) 0.016(6) 
C5 0.057(8) 0.055(8) 0.052(7) -0.005(6) 0.012(6) 0.016(6) 
C6 0.047(7) 0.047(7) 0.034(6) 0.000(5) 0.008(5) 0.005(5) 
C7 0.055(7) 0.046(6) 0.044(6) 0.020(5) 0.016(5) 0.027(6) 
C8 0.047(7) 0.076(9) 0.039(6) 0.027(6) 0.011(5) 0.031(7) 
C9 0.072(9) 0.089(10) 0.072(9) 0.041(8) 0.019(7) 0.053(8) 
C10 0.082(10) 0.061(9) 0.096(11) 0.021(8) 0.028(9) 0.033(8) 
C11 0.080(9) 0.043(7) 0.051(7) 0.012(6) 0.021(6) 0.015(6) 
C12 0.086(10) 0.047(7) 0.072(9) 0.017(6) 0.037(8) 0.014(7) 
C13 0.073(9) 0.058(9) 0.093(11) 0.001(8) 0.018(8) 0.010(7) 
C14 0.064(8) 0.060(8) 0.060(8) 0.003(7) -0.003(7) 0.010(7) 
C15 0.068(8) 0.056(8) 0.052(7) 0.000(6) 0.005(6) 0.021(6) 
C16 0.049(7) 0.078(9) 0.056(8) 0.014(6) 0.015(6) 0.028(7) 
C17 0.074(9) 0.072(8) 0.039(6) 0.005(6) 0.002(6) 0.056(7) 
C18 0.054(7) 0.090(10) 0.062(8) 0.040(7) 0.027(6) 0.027(7) 
C19 0.037(7) 0.062(9) 0.097(11) 0.028(8) 0.019(6) 0.004(6) 
C20 0.054(8) 0.092(11) 0.067(9) 0.012(8) 0.002(7) 0.023(7) 
C21 0.068(9) 0.073(10) 0.065(9) 0.005(7) 0.010(7) 0.012(7) 
C22 0.053(7) 0.076(9) 0.055(8) 0.018(7) 0.012(6) 0.030(7) 
N5 0.060(6) 0.057(6) 0.042(6) 0.016(5) 0.013(5) 0.021(5) 
O3 0.105(7) 0.076(6) 0.056(5) 0.027(5) 0.036(5) 0.047(5) 
O4 0.079(6) 0.088(7) 0.061(6) 0.028(5) 0.023(5) 0.045(5) 
O5 0.132(9) 0.122(9) 0.129(9) 0.074(8) 0.093(8) 0.086(8) 
N6 0.093(17) 0.085(18) 0.041(15) 0.027(13) 0.040(13) 0.064(15) 
O6 0.079(14) 0.108(18) 0.052(12) 0.025(13) 0.031(10) 0.031(13) 
O7 0.16(2) 0.13(2) 0.059(17) 0.030(15) 0.052(15) 0.05(2) 
O8 0.067(6) 0.095(8) 0.077(7) 0.026(6) 0.024(5) 0.039(6) 
N7 0.10(2) 0.07(2) 0.08(2) 0.035(18) 0.029(18) 0.054(17) 
O9 0.12(2) 0.073(15) 0.097(17) 0.025(12) 0.027(17) 0.057(16) 
O10 0.12(2) 0.080(16) 0.081(16) 0.021(14) 0.023(14) 0.033(15) 
O11 0.110(9) 0.092(9) 0.098(9) 0.008(7) 0.017(7) 0.012(7) 
O1W 0.067(6) 0.095(8) 0.077(7) 0.026(6) 0.024(5) 0.039(6) 
O2W 0.110(9) 0.092(9) 0.098(9) 0.008(7) 0.017(7) 0.012(7) 
 
_geom_special_details 
; 
 All esds (except the esd in the dihedral angle between two l.s. planes) 
 are estimated using the full covariance matrix.  The cell esds are taken 
 into account individually in the estimation of esds in distances, angles 
 and torsion angles; correlations between esds in cell parameters are only 
 used when they are defined by crystal symmetry.  An approximate (isotropic) 
 treatment of cell esds is used for estimating esds involving l.s. planes. 
; 
 
loop_ 
 _geom_bond_atom_site_label_1 
 _geom_bond_atom_site_label_2 
 _geom_bond_distance 
 _geom_bond_site_symmetry_2 
 _geom_bond_publ_flag 
Cu1 O2 1.925(6) . ? 
Cu1 N1 1.951(8) . ? 
Cu1 O1 2.006(7) . ? 
Cu1 N3 2.097(8) . ? 
Cu1 O3 2.360(8) . ? 
Cu1 Cu2 2.944(2) . ? 
Cu2 O2 1.937(7) . ? 
Cu2 N2 1.959(9) . ? 
Cu2 O1 1.980(6) . ? 
Cu2 N4 2.075(7) . ? 
Cu2 O4 2.437(9) . ? 
Cl1 C4 1.747(12) . ? 
O1 C1 1.303(11) . ? 
O2 H2 0.8496 . ? 
N1 C8 1.271(13) . ? 
N1 C9 1.462(14) . ? 
N2 C7 1.270(13) . ? 
N2 C16 1.438(13) . ? 
N3 C11 1.482(13) . ? 
N3 C10 1.501(15) . ? 
N3 C15 1.520(13) . ? 
N4 C18 1.487(13) . ? 
N4 C22 1.506(13) . ? 
N4 C17 1.531(13) . ? 
C1 C6 1.427(14) . ? 
C1 C2 1.456(13) . ? 
C2 C3 1.385(14) . ? 
C2 C8 1.451(15) . ? 
C3 C4 1.388(15) . ? 
C3 H3 0.9300 . ? 
C4 C5 1.379(15) . ? 
C5 C6 1.421(15) . ? 
C5 H5 0.9300 . ? 
C6 C7 1.491(14) . ? 
C7 H7 0.9300 . ? 
C8 H8 0.9300 . ? 
C9 C10 1.491(17) . ? 
C9 H9A 0.9700 . ? 
C9 H9B 0.9700 . ? 
C10 H10A 0.9700 . ? 
C10 H10B 0.9700 . ? 
C11 C12 1.532(16) . ? 
C11 H11A 0.9700 . ? 
C11 H11B 0.9700 . ? 
C12 C13 1.516(17) . ? 
C12 H12A 0.9700 . ? 
C12 H12B 0.9700 . ? 
C13 C14 1.529(18) . ? 
C13 H13A 0.9700 . ? 
C13 H13B 0.9700 . ? 
C14 C15 1.512(16) . ? 
C14 H14A 0.9700 . ? 
C14 H14B 0.9700 . ? 
C15 H15A 0.9700 . ? 
C15 H15B 0.9700 . ? 
C16 C17 1.471(16) . ? 
C16 H16A 0.9700 . ? 
C16 H16B 0.9700 . ? 
C17 H17A 0.9700 . ? 
C17 H17B 0.9700 . ? 
C18 C19 1.518(16) . ? 
C18 H18A 0.9700 . ? 
C18 H18B 0.9700 . ? 
C19 C20 1.520(17) . ? 
C19 H19A 0.9700 . ? 
C19 H19B 0.9700 . ? 
C20 C21 1.536(17) . ? 
C20 H20A 0.9700 . ? 
C20 H20B 0.9700 . ? 
C21 C22 1.503(16) . ? 
C21 H21A 0.9700 . ? 
C21 H21B 0.9700 . ? 
C22 H22A 0.9700 . ? 
C22 H22B 0.9700 . ? 
N5 O5 1.227(12) . ? 
N5 O3 1.259(11) . ? 
N5 O4 1.263(12) . ? 
N6 O8 1.17(2) . ? 
N6 O7 1.22(3) . ? 
N6 O6 1.28(3) . ? 
O6 O7 1.23(3) 2_655 ? 
O7 O6 1.23(3) 2_655 ? 
N7 O11 1.18(3) . ? 
N7 O9 1.25(3) . ? 
N7 O10 1.26(3) . ? 
O9 O10 1.32(3) 2_565 ? 
O10 O9 1.32(3) 2_565 ? 
 
loop_ 
 _geom_angle_atom_site_label_1 
 _geom_angle_atom_site_label_2 
 _geom_angle_atom_site_label_3 
 _geom_angle 
 _geom_angle_site_symmetry_1 
 _geom_angle_site_symmetry_3 
 _geom_angle_publ_flag 
O2 Cu1 N1 167.6(3) . . ? 
O2 Cu1 O1 80.7(3) . . ? 
N1 Cu1 O1 90.0(3) . . ? 
O2 Cu1 N3 103.9(3) . . ? 
N1 Cu1 N3 85.4(4) . . ? 
O1 Cu1 N3 175.4(3) . . ? 
O2 Cu1 O3 97.2(3) . . ? 
N1 Cu1 O3 90.4(3) . . ? 
O1 Cu1 O3 87.4(3) . . ? 
N3 Cu1 O3 92.9(3) . . ? 
O2 Cu1 Cu2 40.5(2) . . ? 
N1 Cu1 Cu2 131.7(3) . . ? 
O1 Cu1 Cu2 42.04(17) . . ? 
N3 Cu1 Cu2 142.6(2) . . ? 
O3 Cu1 Cu2 83.7(2) . . ? 
O2 Cu2 N2 170.6(3) . . ? 
O2 Cu2 O1 81.0(3) . . ? 
N2 Cu2 O1 90.6(3) . . ? 
O2 Cu2 N4 102.2(3) . . ? 
N2 Cu2 N4 85.9(3) . . ? 
O1 Cu2 N4 175.0(3) . . ? 
O2 Cu2 O4 93.3(3) . . ? 
N2 Cu2 O4 89.8(3) . . ? 
O1 Cu2 O4 83.1(3) . . ? 
N4 Cu2 O4 100.4(3) . . ? 
O2 Cu2 Cu1 40.16(19) . . ? 
N2 Cu2 Cu1 132.5(2) . . ? 
O1 Cu2 Cu1 42.72(19) . . ? 
N4 Cu2 Cu1 141.3(2) . . ? 
O4 Cu2 Cu1 78.3(2) . . ? 
C1 O1 Cu2 131.1(6) . . ? 
C1 O1 Cu1 129.5(6) . . ? 
Cu2 O1 Cu1 95.2(3) . . ? 
Cu1 O2 Cu2 99.4(3) . . ? 
Cu1 O2 H2 112.6 . . ? 
Cu2 O2 H2 94.9 . . ? 
C8 N1 C9 119.4(9) . . ? 
C8 N1 Cu1 127.1(8) . . ? 
C9 N1 Cu1 113.3(7) . . ? 
C7 N2 C16 118.0(9) . . ? 
C7 N2 Cu2 127.3(7) . . ? 
C16 N2 Cu2 114.6(7) . . ? 
C11 N3 C10 111.0(9) . . ? 
C11 N3 C15 108.8(9) . . ? 
C10 N3 C15 108.5(9) . . ? 
C11 N3 Cu1 114.4(7) . . ? 
C10 N3 Cu1 100.3(7) . . ? 
C15 N3 Cu1 113.5(6) . . ? 
C18 N4 C22 108.9(8) . . ? 
C18 N4 C17 111.5(9) . . ? 
C22 N4 C17 107.1(8) . . ? 
C18 N4 Cu2 118.0(6) . . ? 
C22 N4 Cu2 110.2(6) . . ? 
C17 N4 Cu2 100.5(6) . . ? 
O1 C1 C6 120.1(9) . . ? 
O1 C1 C2 121.5(9) . . ? 
C6 C1 C2 118.3(9) . . ? 
C3 C2 C8 119.2(10) . . ? 
C3 C2 C1 119.4(10) . . ? 
C8 C2 C1 121.3(9) . . ? 
C2 C3 C4 121.5(10) . . ? 
C2 C3 H3 119.2 . . ? 
C4 C3 H3 119.2 . . ? 
C5 C4 C3 120.8(11) . . ? 
C5 C4 Cl1 120.8(10) . . ? 
C3 C4 Cl1 118.4(9) . . ? 
C4 C5 C6 120.5(12) . . ? 
C4 C5 H5 119.7 . . ? 
C6 C5 H5 119.7 . . ? 
C5 C6 C1 119.5(10) . . ? 
C5 C6 C7 116.7(10) . . ? 
C1 C6 C7 123.7(9) . . ? 
N2 C7 C6 125.9(10) . . ? 
N2 C7 H7 117.1 . . ? 
C6 C7 H7 117.1 . . ? 
N1 C8 C2 128.6(10) . . ? 
N1 C8 H8 115.7 . . ? 
C2 C8 H8 115.7 . . ? 
N1 C9 C10 106.5(9) . . ? 
N1 C9 H9A 110.4 . . ? 
C10 C9 H9A 110.4 . . ? 
N1 C9 H9B 110.4 . . ? 
C10 C9 H9B 110.4 . . ? 
H9A C9 H9B 108.6 . . ? 
C9 C10 N3 111.8(11) . . ? 
C9 C10 H10A 109.3 . . ? 
N3 C10 H10A 109.3 . . ? 
C9 C10 H10B 109.3 . . ? 
N3 C10 H10B 109.3 . . ? 
H10A C10 H10B 107.9 . . ? 
N3 C11 C12 112.3(9) . . ? 
N3 C11 H11A 109.1 . . ? 
C12 C11 H11A 109.1 . . ? 
N3 C11 H11B 109.1 . . ? 
C12 C11 H11B 109.1 . . ? 
H11A C11 H11B 107.9 . . ? 
C13 C12 C11 109.9(11) . . ? 
C13 C12 H12A 109.7 . . ? 
C11 C12 H12A 109.7 . . ? 
C13 C12 H12B 109.7 . . ? 
C11 C12 H12B 109.7 . . ? 
H12A C12 H12B 108.2 . . ? 
C12 C13 C14 110.7(11) . . ? 
C12 C13 H13A 109.5 . . ? 
C14 C13 H13A 109.5 . . ? 
C12 C13 H13B 109.5 . . ? 
C14 C13 H13B 109.5 . . ? 
H13A C13 H13B 108.1 . . ? 
C15 C14 C13 111.2(11) . . ? 
C15 C14 H14A 109.4 . . ? 
C13 C14 H14A 109.4 . . ? 
C15 C14 H14B 109.4 . . ? 
C13 C14 H14B 109.4 . . ? 
H14A C14 H14B 108.0 . . ? 
C14 C15 N3 113.7(10) . . ? 
C14 C15 H15A 108.8 . . ? 
N3 C15 H15A 108.8 . . ? 
C14 C15 H15B 108.8 . . ? 
N3 C15 H15B 108.8 . . ? 
H15A C15 H15B 107.7 . . ? 
N2 C16 C17 107.6(10) . . ? 
N2 C16 H16A 110.2 . . ? 
C17 C16 H16A 110.2 . . ? 
N2 C16 H16B 110.2 . . ? 
C17 C16 H16B 110.2 . . ? 
H16A C16 H16B 108.5 . . ? 
C16 C17 N4 114.6(9) . . ? 
C16 C17 H17A 108.6 . . ? 
N4 C17 H17A 108.6 . . ? 
C16 C17 H17B 108.6 . . ? 
N4 C17 H17B 108.6 . . ? 
H17A C17 H17B 107.6 . . ? 
N4 C18 C19 115.6(10) . . ? 
N4 C18 H18A 108.4 . . ? 
C19 C18 H18A 108.4 . . ? 
N4 C18 H18B 108.4 . . ? 
C19 C18 H18B 108.4 . . ? 
H18A C18 H18B 107.4 . . ? 
C18 C19 C20 112.0(11) . . ? 
C18 C19 H19A 109.2 . . ? 
C20 C19 H19A 109.2 . . ? 
C18 C19 H19B 109.2 . . ? 
C20 C19 H19B 109.2 . . ? 
H19A C19 H19B 107.9 . . ? 
C19 C20 C21 107.7(10) . . ? 
C19 C20 H20A 110.2 . . ? 
C21 C20 H20A 110.2 . . ? 
C19 C20 H20B 110.2 . . ? 
C21 C20 H20B 110.2 . . ? 
H20A C20 H20B 108.5 . . ? 
C22 C21 C20 112.8(12) . . ? 
C22 C21 H21A 109.0 . . ? 
C20 C21 H21A 109.0 . . ? 
C22 C21 H21B 109.0 . . ? 
C20 C21 H21B 109.0 . . ? 
H21A C21 H21B 107.8 . . ? 
C21 C22 N4 111.2(10) . . ? 
C21 C22 H22A 109.4 . . ? 
N4 C22 H22A 109.4 . . ? 
C21 C22 H22B 109.4 . . ? 
N4 C22 H22B 109.4 . . ? 
H22A C22 H22B 108.0 . . ? 
O5 N5 O3 119.2(10) . . ? 
O5 N5 O4 120.2(10) . . ? 
O3 N5 O4 120.6(10) . . ? 
N5 O3 Cu1 124.6(7) . . ? 
N5 O4 Cu2 127.9(7) . . ? 
O8 N6 O7 123(3) . . ? 
O8 N6 O6 123(2) . . ? 
O7 N6 O6 114(3) . . ? 
O7 O6 N6 134(2) 2_655 . ? 
N6 O7 O6 112(2) . 2_655 ? 
O11 N7 O9 122(3) . . ? 
O11 N7 O10 119(4) . . ? 
O9 N7 O10 119(3) . . ? 
N7 O9 O10 134(3) . 2_565 ? 
N7 O10 O9 105(3) . 2_565 ? 
 
_diffrn_measured_fraction_theta_max    0.980 
_diffrn_reflns_theta_full              23.56 
_diffrn_measured_fraction_theta_full   0.980
_refine_diff_density_max    0.767 
_refine_diff_density_min   -0.710 
_refine_diff_density_rms    0.118 
 

#===END

 
data_2
 
_audit_creation_method            SHELXL-97
_chemical_name_systematic
;
 ?
;
_chemical_name_common             ?
_chemical_melting_point           ?
_chemical_formula_moiety          
 'C26 H42 Cu2 N5 O5, N O3, H2 O'
_chemical_formula_sum
 'C26 H44 Cu2 N6 O9'
_chemical_formula_weight          711.75
 
loop_
 _atom_type_symbol
 _atom_type_description
 _atom_type_scat_dispersion_real
 _atom_type_scat_dispersion_imag
 _atom_type_scat_source
 'C'  'C'   0.0033   0.0016
 'International Tables Vol C Tables 4.2.6.8 and 6.1.1.4'
 'H'  'H'   0.0000   0.0000
 'International Tables Vol C Tables 4.2.6.8 and 6.1.1.4'
 'N'  'N'   0.0061   0.0033
 'International Tables Vol C Tables 4.2.6.8 and 6.1.1.4'
 'O'  'O'   0.0106   0.0060
 'International Tables Vol C Tables 4.2.6.8 and 6.1.1.4'
 'Cu'  'Cu'   0.3201   1.2651
 'International Tables Vol C Tables 4.2.6.8 and 6.1.1.4'
 
_symmetry_cell_setting            'monoclinic'
_symmetry_space_group_name_H-M    'P 21/n'
 
loop_
 _symmetry_equiv_pos_as_xyz
 'x, y, z'
 '-x+1/2, y+1/2, -z+1/2'
 '-x, -y, -z'
 'x-1/2, -y-1/2, z-1/2'
 
_cell_length_a                    15.907(3)
_cell_length_b                    11.836(2)
_cell_length_c                    17.008(3)
_cell_angle_alpha                 90.00
_cell_angle_beta                  94.178(2)
_cell_angle_gamma                 90.00
_cell_volume                      3193.5(10)
_cell_formula_units_Z             4
_cell_measurement_temperature     296(2)
_cell_measurement_reflns_used     ?
_cell_measurement_theta_min       ?
_cell_measurement_theta_max       ?
 
_exptl_crystal_description        block
_exptl_crystal_colour             'green '
_exptl_crystal_size_max           0.36
_exptl_crystal_size_mid           0.30
_exptl_crystal_size_min           0.28
_exptl_crystal_density_meas       ?
_exptl_crystal_density_diffrn     1.480
_exptl_crystal_density_method     'not measured'
_exptl_crystal_F_000              1488
_exptl_absorpt_coefficient_mu     1.390
_exptl_absorpt_correction_type    'MULTI-SCAN'
_exptl_absorpt_correction_T_min      0.6215
_exptl_absorpt_correction_T_max      0.6496
_exptl_absorpt_process_details    'BRUKER SADABS'
 
_exptl_special_details
;
 ?
;
 
_diffrn_ambient_temperature       296(2)
_diffrn_radiation_wavelength      0.71073
_diffrn_radiation_type            MoK\a
_diffrn_radiation_source          'fine-focus sealed tube'
_diffrn_radiation_monochromator   graphite 
_diffrn_measurement_device_type   'BRUKER SMART APEX CCD DIFFRACTOMETER' 
_diffrn_measurement_method        'OMEGA-PHI SCAN' 
_diffrn_detector_area_resol_mean  ?
_diffrn_standards_number          ?
_diffrn_standards_interval_count  ?
_diffrn_standards_interval_time   ?
_diffrn_standards_decay_%         ?
_diffrn_reflns_number             21837
_diffrn_reflns_av_R_equivalents   0.0348
_diffrn_reflns_av_sigmaI/netI     0.0342
_diffrn_reflns_limit_h_min        -17
_diffrn_reflns_limit_h_max        18
_diffrn_reflns_limit_k_min        -14
_diffrn_reflns_limit_k_max        13
_diffrn_reflns_limit_l_min        -20
_diffrn_reflns_limit_l_max        20
_diffrn_reflns_theta_min          1.69
_diffrn_reflns_theta_max          25.27
_reflns_number_total              5720
_reflns_number_gt                 4446
_reflns_threshold_expression      >2\s(I)
 
_computing_data_collection        'BRUKER SMART' 
_computing_cell_refinement        'BRUKER SMART' 
_computing_data_reduction         'BRUKER SAINT' 
_computing_structure_solution     'SHELX97 (Sheldrick, 2008)'
_computing_structure_refinement   'SHELX97 (Sheldrick, 2008)'
_computing_molecular_graphics     'Ortep3 for Windows (Farrugia,1997)'
_computing_publication_material   'Wingx 1.80.05 (Farrugia, 1999)'
 
_refine_special_details
;
 Refinement of F^2^ against ALL reflections.  The weighted R-factor wR and
 goodness of fit S are based on F^2^, conventional R-factors R are based
 on F, with F set to zero for negative F^2^. The threshold expression of
 F^2^ > 2\s(F^2^) is used only for calculating R-factors(gt) etc. and is
 not relevant to the choice of reflections for refinement.  R-factors based
 on F^2^ are statistically about twice as large as those based on F, and R-
 factors based on ALL data will be even larger.
 
 H atoms ow water molecule (O1w, O2w) not assigned
;
 
_refine_ls_structure_factor_coef  Fsqd
_refine_ls_matrix_type            full
_refine_ls_weighting_scheme       calc
_refine_ls_weighting_details
 'calc w=1/[\s^2^(Fo^2^)+(0.1091P)^2^+3.1132P] where P=(Fo^2^+2Fc^2^)/3'
_atom_sites_solution_primary      direct
_atom_sites_solution_secondary    difmap
_atom_sites_solution_hydrogens    geom
_refine_ls_hydrogen_treatment     mixed
_refine_ls_extinction_method      none
_refine_ls_extinction_coef        ?
_refine_ls_number_reflns          5720
_refine_ls_number_parameters      403
_refine_ls_number_restraints      25
_refine_ls_R_factor_all           0.0663
_refine_ls_R_factor_gt            0.0519
_refine_ls_wR_factor_ref          0.1753
_refine_ls_wR_factor_gt           0.1594
_refine_ls_goodness_of_fit_ref    1.051
_refine_ls_restrained_S_all       1.085
_refine_ls_shift/su_max           0.001
_refine_ls_shift/su_mean          0.000
 
loop_
 _atom_site_label
 _atom_site_type_symbol
 _atom_site_fract_x
 _atom_site_fract_y
 _atom_site_fract_z
 _atom_site_U_iso_or_equiv
 _atom_site_adp_type
 _atom_site_occupancy
 _atom_site_symmetry_multiplicity
 _atom_site_calc_flag
 _atom_site_refinement_flags
 _atom_site_disorder_assembly
 _atom_site_disorder_group
Cu1 Cu 0.05504(3) 0.96940(4) 0.18016(3) 0.03421(19) Uani 1 1 d . . .
Cu2 Cu 0.18373(3) 0.97054(4) 0.06743(3) 0.03407(19) Uani 1 1 d . . .
O1 O 0.06355(18) 0.9311(2) 0.06881(16) 0.0347(7) Uani 1 1 d . . .
O2 O 0.1563(2) 1.0458(3) 0.16054(18) 0.0409(7) Uani 1 1 d D . .
H2 H 0.186(3) 1.075(4) 0.192(2) 0.049 Uiso 1 1 d D . .
O3 O 0.1256(2) 0.7925(3) 0.2167(2) 0.0590(9) Uani 1 1 d . . .
O4 O 0.2202(2) 0.7932(3) 0.1311(2) 0.0560(9) Uani 1 1 d . . .
O5 O 0.2272(2) 0.6722(3) 0.2258(2) 0.0633(10) Uani 1 1 d . . .
N1 N -0.0574(2) 0.9077(3) 0.1754(2) 0.0463(10) Uani 1 1 d . . .
N2 N 0.1848(2) 0.9103(3) -0.0373(2) 0.0434(9) Uani 1 1 d . . .
N3 N 0.0350(2) 1.0159(3) 0.2926(2) 0.0358(8) Uani 1 1 d . . .
N4 N 0.3056(2) 1.0163(3) 0.0563(2) 0.0339(8) Uani 1 1 d . . .
N5 N 0.1912(2) 0.7530(3) 0.1915(2) 0.0404(9) Uani 1 1 d . . .
C1 C 0.0241(3) 0.8473(3) 0.0295(2) 0.0332(9) Uani 1 1 d . . .
C2 C 0.0554(3) 0.8034(4) -0.0395(2) 0.0400(10) Uani 1 1 d . . .
C3 C 0.0116(3) 0.7164(4) -0.0808(3) 0.0431(11) Uani 1 1 d . . .
H3 H 0.0328 0.6897 -0.1269 0.052 Uiso 1 1 calc R . .
C4 C -0.0613(3) 0.6683(4) -0.0568(3) 0.0399(10) Uani 1 1 d . . .
C5 C -0.1060(3) 0.5722(4) -0.1036(3) 0.0422(11) Uani 1 1 d . . .
C6 C -0.0912(3) 0.7136(4) 0.0110(3) 0.0424(11) Uani 1 1 d . . .
H6 H -0.1409 0.6846 0.0285 0.051 Uiso 1 1 calc R . .
C7 C -0.0505(3) 0.8009(4) 0.0545(3) 0.0389(10) Uani 1 1 d . . .
C8 C -0.0885(3) 0.8369(4) 0.1245(3) 0.0461(11) Uani 1 1 d . . .
H8 H -0.1406 0.8057 0.1335 0.055 Uiso 1 1 calc R . .
C9 C 0.1324(3) 0.8411(4) -0.0704(3) 0.0460(11) Uani 1 1 d . . .
H9 H 0.1450 0.8123 -0.1191 0.055 Uiso 1 1 calc R . .
C10 C 0.2618(4) 0.9411(5) -0.0753(3) 0.0559(14) Uani 1 1 d . . .
H10A H 0.2544 1.0134 -0.1018 0.067 Uiso 1 1 calc R . .
H10B H 0.2745 0.8845 -0.1139 0.067 Uiso 1 1 calc R . .
C11 C 0.3317(3) 0.9481(4) -0.0114(3) 0.0486(12) Uani 1 1 d . . .
H11A H 0.3470 0.8726 0.0066 0.058 Uiso 1 1 calc R . .
H11B H 0.3809 0.9823 -0.0323 0.058 Uiso 1 1 calc R . .
C12 C -0.1027(3) 0.9374(5) 0.2440(3) 0.0552(13) Uani 1 1 d . . .
H12A H -0.1438 0.8795 0.2539 0.066 Uiso 1 1 calc R . .
H12B H -0.1321 1.0086 0.2352 0.066 Uiso 1 1 calc R . .
C13 C -0.0383(3) 0.9471(5) 0.3132(3) 0.0514(12) Uani 1 1 d . . .
H13A H -0.0641 0.9818 0.3571 0.062 Uiso 1 1 calc R . .
H13B H -0.0193 0.8722 0.3293 0.062 Uiso 1 1 calc R . .
C14 C -0.0447(4) 0.4982(6) -0.1433(5) 0.098(3) Uani 1 1 d . . .
H14A H 0.0031 0.4827 -0.1072 0.147 Uiso 1 1 calc R . .
H14B H -0.0264 0.5363 -0.1889 0.147 Uiso 1 1 calc R . .
H14C H -0.0718 0.4285 -0.1591 0.147 Uiso 1 1 calc R . .
C15 C -0.1684(4) 0.6231(5) -0.1655(4) 0.0731(18) Uani 1 1 d . . .
H15A H -0.1395 0.6741 -0.1981 0.110 Uiso 1 1 calc R . .
H15B H -0.2112 0.6635 -0.1400 0.110 Uiso 1 1 calc R . .
H15C H -0.1941 0.5639 -0.1975 0.110 Uiso 1 1 calc R . .
C16 C -0.1562(6) 0.4976(6) -0.0503(4) 0.100(3) Uani 1 1 d . . .
H16A H -0.1833 0.4381 -0.0809 0.151 Uiso 1 1 calc R . .
H16B H -0.1981 0.5425 -0.0269 0.151 Uiso 1 1 calc R . .
H16C H -0.1187 0.4655 -0.0094 0.151 Uiso 1 1 calc R . .
C17 C 0.0204(3) 1.1400(4) 0.2942(3) 0.0502(12) Uani 1 1 d . . .
H17A H -0.0299 1.1577 0.2609 0.060 Uiso 1 1 calc R . .
H17B H 0.0676 1.1780 0.2725 0.060 Uiso 1 1 calc R . .
C18 C 0.0103(4) 1.1851(5) 0.3762(3) 0.0620(15) Uani 1 1 d . . .
H18A H 0.0057 1.2668 0.3740 0.074 Uiso 1 1 calc R . .
H18B H -0.0415 1.1558 0.3951 0.074 Uiso 1 1 calc R . .
C19 C 0.0831(4) 1.1530(5) 0.4332(3) 0.0644(16) Uani 1 1 d . . .
H19A H 0.0710 1.1753 0.4861 0.077 Uiso 1 1 calc R . .
H19B H 0.1333 1.1929 0.4197 0.077 Uiso 1 1 calc R . .
C20 C 0.0990(4) 1.0267(4) 0.4312(3) 0.0539(13) Uani 1 1 d . . .
H20A H 0.1496 1.0087 0.4641 0.065 Uiso 1 1 calc R . .
H20B H 0.0520 0.9870 0.4519 0.065 Uiso 1 1 calc R . .
C21 C 0.1091(3) 0.9886(4) 0.3476(3) 0.0444(11) Uani 1 1 d . . .
H21A H 0.1587 1.0245 0.3288 0.053 Uiso 1 1 calc R . .
H21B H 0.1183 0.9076 0.3474 0.053 Uiso 1 1 calc R . .
C22 C 0.3602(3) 0.9898(4) 0.1286(3) 0.0459(11) Uani 1 1 d . . .
H22A H 0.3592 0.9089 0.1377 0.055 Uiso 1 1 calc R . .
H22B H 0.3372 1.0263 0.1734 0.055 Uiso 1 1 calc R . .
C23 C 0.4508(3) 1.0271(4) 0.1241(3) 0.0540(13) Uani 1 1 d . . .
H23A H 0.4830 1.0087 0.1731 0.065 Uiso 1 1 calc R . .
H23B H 0.4756 0.9872 0.0817 0.065 Uiso 1 1 calc R . .
C24 C 0.4545(3) 1.1529(5) 0.1097(3) 0.0605(15) Uani 1 1 d . . .
H24A H 0.5121 1.1749 0.1020 0.073 Uiso 1 1 calc R . .
H24B H 0.4368 1.1930 0.1554 0.073 Uiso 1 1 calc R . .
C25 C 0.3979(4) 1.1852(4) 0.0376(3) 0.0600(15) Uani 1 1 d . . .
H25A H 0.3960 1.2669 0.0329 0.072 Uiso 1 1 calc R . .
H25B H 0.4213 1.1553 -0.0092 0.072 Uiso 1 1 calc R . .
C26 C 0.3094(3) 1.1405(4) 0.0422(3) 0.0480(11) Uani 1 1 d . . .
H26A H 0.2833 1.1792 0.0844 0.058 Uiso 1 1 calc R . .
H26B H 0.2767 1.1579 -0.0067 0.058 Uiso 1 1 calc R . .
N6 N 0.6774(6) 0.8063(10) 0.2215(6) 0.132(3) Uani 1 1 d U . .
O6 O 0.7002(6) 0.7221(8) 0.2560(4) 0.165(3) Uani 1 1 d U . .
O7 O 0.6418(9) 0.8738(12) 0.2625(9) 0.257(6) Uani 1 1 d U . .
O8 O 0.6934(6) 0.8174(9) 0.1584(5) 0.185(4) Uani 1 1 d U . .
O1W O 0.8526(15) 0.615(2) 0.2347(18) 0.318(19) Uani 0.50 1 d P . .
O2W O 0.7390(12) 0.581(2) 0.1206(10) 0.230(11) Uani 0.50 1 d P . .
 
loop_
 _atom_site_aniso_label
 _atom_site_aniso_U_11
 _atom_site_aniso_U_22
 _atom_site_aniso_U_33
 _atom_site_aniso_U_23
 _atom_site_aniso_U_13
 _atom_site_aniso_U_12
Cu1 0.0309(3) 0.0368(3) 0.0359(3) -0.0086(2) 0.0085(2) -0.0037(2)
Cu2 0.0373(3) 0.0358(3) 0.0301(3) -0.0045(2) 0.0096(2) -0.0068(2)
O1 0.0376(16) 0.0310(15) 0.0359(15) -0.0067(12) 0.0048(13) -0.0045(12)
O2 0.0364(17) 0.0491(19) 0.0387(17) -0.0169(14) 0.0118(13) -0.0131(14)
O3 0.066(2) 0.051(2) 0.063(2) 0.0100(17) 0.0284(19) 0.0117(18)
O4 0.059(2) 0.047(2) 0.066(2) 0.0084(17) 0.0282(18) 0.0066(16)
O5 0.074(3) 0.046(2) 0.068(2) 0.0108(18) -0.0104(19) 0.0100(19)
N1 0.032(2) 0.055(2) 0.053(2) -0.0172(19) 0.0116(17) -0.0039(18)
N2 0.051(2) 0.046(2) 0.0342(19) -0.0033(17) 0.0118(17) -0.0124(19)
N3 0.035(2) 0.0324(19) 0.041(2) -0.0052(15) 0.0113(16) -0.0030(15)
N4 0.040(2) 0.0325(18) 0.0312(18) -0.0014(14) 0.0143(15) -0.0033(15)
N5 0.047(2) 0.0286(19) 0.046(2) -0.0030(16) 0.0008(18) -0.0021(16)
C1 0.035(2) 0.029(2) 0.035(2) -0.0013(17) -0.0050(17) 0.0000(17)
C2 0.049(3) 0.040(2) 0.031(2) -0.0006(18) 0.0013(19) -0.005(2)
C3 0.052(3) 0.044(3) 0.033(2) -0.0058(19) -0.0034(19) -0.006(2)
C4 0.043(3) 0.032(2) 0.044(2) -0.0044(19) -0.0070(19) 0.0012(19)
C5 0.047(3) 0.033(2) 0.045(2) -0.0056(19) -0.010(2) -0.007(2)
C6 0.032(2) 0.045(3) 0.049(3) -0.007(2) -0.0034(19) -0.0034(19)
C7 0.034(2) 0.041(2) 0.041(2) -0.0072(19) -0.0011(18) 0.0020(19)
C8 0.033(2) 0.047(3) 0.059(3) -0.010(2) 0.008(2) -0.006(2)
C9 0.058(3) 0.048(3) 0.033(2) -0.005(2) 0.010(2) -0.011(2)
C10 0.064(3) 0.070(3) 0.036(2) -0.010(2) 0.019(2) -0.022(3)
C11 0.052(3) 0.046(3) 0.051(3) -0.014(2) 0.027(2) -0.008(2)
C12 0.038(3) 0.067(3) 0.063(3) -0.024(3) 0.018(2) -0.011(2)
C13 0.048(3) 0.057(3) 0.052(3) -0.010(2) 0.020(2) -0.014(2)
C14 0.062(4) 0.073(4) 0.158(8) -0.070(5) -0.009(4) 0.002(3)
C15 0.081(4) 0.061(4) 0.072(4) -0.009(3) -0.035(3) 0.000(3)
C16 0.170(8) 0.077(4) 0.054(4) -0.006(3) 0.001(4) -0.074(5)
C17 0.058(3) 0.042(3) 0.053(3) -0.003(2) 0.016(2) 0.011(2)
C18 0.080(4) 0.040(3) 0.069(3) -0.018(3) 0.024(3) 0.006(3)
C19 0.079(4) 0.064(3) 0.052(3) -0.026(3) 0.022(3) -0.023(3)
C20 0.054(3) 0.067(4) 0.041(3) -0.008(2) 0.008(2) -0.004(3)
C21 0.046(3) 0.048(3) 0.040(2) -0.003(2) 0.006(2) 0.005(2)
C22 0.046(3) 0.046(3) 0.047(3) 0.007(2) 0.008(2) -0.001(2)
C23 0.040(3) 0.064(4) 0.059(3) -0.005(2) 0.009(2) -0.006(2)
C24 0.051(3) 0.058(3) 0.075(4) -0.019(3) 0.026(3) -0.020(3)
C25 0.072(4) 0.036(3) 0.076(4) -0.003(2) 0.033(3) -0.017(2)
C26 0.058(3) 0.037(2) 0.052(3) 0.006(2) 0.022(2) 0.002(2)
N6 0.118(6) 0.155(7) 0.125(6) 0.032(6) 0.017(5) -0.051(5)
O6 0.198(7) 0.178(6) 0.122(5) 0.075(5) 0.026(4) 0.002(5)
O7 0.249(9) 0.245(9) 0.286(10) -0.019(8) 0.080(8) 0.021(8)
O8 0.193(7) 0.245(8) 0.115(5) 0.077(5) 0.002(5) -0.084(6)
O1W 0.25(2) 0.28(3) 0.45(4) 0.23(3) 0.22(3) 0.14(2)
O2W 0.181(16) 0.38(3) 0.144(13) -0.082(17) 0.114(13) -0.106(18)
 
_geom_special_details
;
 All s.u.'s (except the s.u. in the dihedral angle between two l.s. planes)
 are estimated using the full covariance matrix.  The cell s.u.'s are taken
 into account individually in the estimation of s.u.'s in distances, angles
 and torsion angles; correlations between s.u.'s in cell parameters are only
 used when they are defined by crystal symmetry.  An approximate (isotropic)
 treatment of cell s.u.'s is used for estimating s.u.'s involving l.s. planes.
;
 
loop_
 _geom_bond_atom_site_label_1
 _geom_bond_atom_site_label_2
 _geom_bond_distance
 _geom_bond_site_symmetry_2
 _geom_bond_publ_flag
Cu1 O2 1.897(3) . ?
Cu1 N1 1.928(4) . ?
Cu1 O1 1.961(3) . ?
Cu1 N3 2.037(4) . ?
Cu1 O3 2.434(3) . ?
Cu1 Cu2 2.9049(8) . ?
Cu2 O2 1.896(3) . ?
Cu2 N2 1.919(4) . ?
Cu2 O1 1.970(3) . ?
Cu2 N4 2.036(4) . ?
Cu2 O4 2.413(3) . ?
O1 C1 1.328(5) . ?
O2 H2 0.77(2) . ?
O3 N5 1.248(5) . ?
O4 N5 1.250(5) . ?
O5 N5 1.239(5) . ?
N1 C8 1.280(6) . ?
N1 C12 1.458(6) . ?
N2 C9 1.271(6) . ?
N2 C10 1.472(6) . ?
N3 C13 1.485(6) . ?
N3 C21 1.486(6) . ?
N3 C17 1.488(6) . ?
N4 C22 1.487(6) . ?
N4 C11 1.490(5) . ?
N4 C26 1.491(6) . ?
C1 C7 1.401(6) . ?
C1 C2 1.407(6) . ?
C2 C3 1.404(6) . ?
C2 C9 1.439(6) . ?
C3 C4 1.380(6) . ?
C3 H3 0.9300 . ?
C4 C6 1.386(6) . ?
C4 C5 1.534(6) . ?
C5 C14 1.506(8) . ?
C5 C15 1.518(7) . ?
C5 C16 1.532(8) . ?
C6 C7 1.402(6) . ?
C6 H6 0.9300 . ?
C7 C8 1.438(6) . ?
C8 H8 0.9300 . ?
C9 H9 0.9300 . ?
C10 C11 1.500(7) . ?
C10 H10A 0.9700 . ?
C10 H10B 0.9700 . ?
C11 H11A 0.9700 . ?
C11 H11B 0.9700 . ?
C12 C13 1.506(7) . ?
C12 H12A 0.9700 . ?
C12 H12B 0.9700 . ?
C13 H13A 0.9700 . ?
C13 H13B 0.9700 . ?
C14 H14A 0.9600 . ?
C14 H14B 0.9600 . ?
C14 H14C 0.9600 . ?
C15 H15A 0.9600 . ?
C15 H15B 0.9600 . ?
C15 H15C 0.9600 . ?
C16 H16A 0.9600 . ?
C16 H16B 0.9600 . ?
C16 H16C 0.9600 . ?
C17 C18 1.512(7) . ?
C17 H17A 0.9700 . ?
C17 H17B 0.9700 . ?
C18 C19 1.504(8) . ?
C18 H18A 0.9700 . ?
C18 H18B 0.9700 . ?
C19 C20 1.517(8) . ?
C19 H19A 0.9700 . ?
C19 H19B 0.9700 . ?
C20 C21 1.511(6) . ?
C20 H20A 0.9700 . ?
C20 H20B 0.9700 . ?
C21 H21A 0.9700 . ?
C21 H21B 0.9700 . ?
C22 C23 1.514(7) . ?
C22 H22A 0.9700 . ?
C22 H22B 0.9700 . ?
C23 C24 1.511(8) . ?
C23 H23A 0.9700 . ?
C23 H23B 0.9700 . ?
C24 C25 1.517(8) . ?
C24 H24A 0.9700 . ?
C24 H24B 0.9700 . ?
C25 C26 1.512(7) . ?
C25 H25A 0.9700 . ?
C25 H25B 0.9700 . ?
C26 H26A 0.9700 . ?
C26 H26B 0.9700 . ?
N6 O8 1.129(10) . ?
N6 O6 1.199(11) . ?
N6 O7 1.226(13) . ?
 
loop_
 _geom_angle_atom_site_label_1
 _geom_angle_atom_site_label_2
 _geom_angle_atom_site_label_3
 _geom_angle
 _geom_angle_site_symmetry_1
 _geom_angle_site_symmetry_3
 _geom_angle_publ_flag
O2 Cu1 N1 165.85(16) . . ?
O2 Cu1 O1 79.69(12) . . ?
N1 Cu1 O1 90.08(14) . . ?
O2 Cu1 N3 103.25(13) . . ?
N1 Cu1 N3 86.17(15) . . ?
O1 Cu1 N3 174.41(13) . . ?
O2 Cu1 O3 94.20(14) . . ?
N1 Cu1 O3 95.40(16) . . ?
O1 Cu1 O3 89.12(12) . . ?
N3 Cu1 O3 95.37(13) . . ?
O2 Cu1 Cu2 39.99(9) . . ?
N1 Cu1 Cu2 132.10(11) . . ?
O1 Cu1 Cu2 42.46(8) . . ?
N3 Cu1 Cu2 141.65(10) . . ?
O3 Cu1 Cu2 80.69(8) . . ?
O2 Cu2 N2 165.44(16) . . ?
O2 Cu2 O1 79.52(12) . . ?
N2 Cu2 O1 89.86(14) . . ?
O2 Cu2 N4 103.40(13) . . ?
N2 Cu2 N4 86.54(15) . . ?
O1 Cu2 N4 175.03(13) . . ?
O2 Cu2 O4 95.54(13) . . ?
N2 Cu2 O4 94.28(15) . . ?
O1 Cu2 O4 89.46(12) . . ?
N4 Cu2 O4 94.22(13) . . ?
O2 Cu2 Cu1 40.03(9) . . ?
N2 Cu2 Cu1 131.69(11) . . ?
O1 Cu2 Cu1 42.25(8) . . ?
N4 Cu2 Cu1 141.67(10) . . ?
O4 Cu2 Cu1 81.83(8) . . ?
C1 O1 Cu1 126.5(3) . . ?
C1 O1 Cu2 126.5(3) . . ?
Cu1 O1 Cu2 95.29(12) . . ?
Cu2 O2 Cu1 99.98(14) . . ?
Cu2 O2 H2 128(4) . . ?
Cu1 O2 H2 126(4) . . ?
N5 O3 Cu1 128.1(3) . . ?
N5 O4 Cu2 127.5(3) . . ?
C8 N1 C12 120.7(4) . . ?
C8 N1 Cu1 126.0(3) . . ?
C12 N1 Cu1 112.7(3) . . ?
C9 N2 C10 120.3(4) . . ?
C9 N2 Cu2 127.0(3) . . ?
C10 N2 Cu2 112.3(3) . . ?
C13 N3 C21 109.5(4) . . ?
C13 N3 C17 114.2(4) . . ?
C21 N3 C17 108.6(4) . . ?
C13 N3 Cu1 104.6(3) . . ?
C21 N3 Cu1 111.2(3) . . ?
C17 N3 Cu1 108.6(3) . . ?
C22 N4 C11 110.3(4) . . ?
C22 N4 C26 108.3(4) . . ?
C11 N4 C26 113.2(3) . . ?
C22 N4 Cu2 111.7(3) . . ?
C11 N4 Cu2 104.4(3) . . ?
C26 N4 Cu2 109.1(3) . . ?
O5 N5 O3 119.8(4) . . ?
O5 N5 O4 119.7(4) . . ?
O3 N5 O4 120.5(4) . . ?
O1 C1 C7 121.3(4) . . ?
O1 C1 C2 120.8(4) . . ?
C7 C1 C2 117.8(4) . . ?
C3 C2 C1 119.7(4) . . ?
C3 C2 C9 116.7(4) . . ?
C1 C2 C9 123.6(4) . . ?
C4 C3 C2 123.4(4) . . ?
C4 C3 H3 118.3 . . ?
C2 C3 H3 118.3 . . ?
C3 C4 C6 115.7(4) . . ?
C3 C4 C5 121.3(4) . . ?
C6 C4 C5 122.9(4) . . ?
C14 C5 C15 109.4(5) . . ?
C14 C5 C16 108.2(6) . . ?
C15 C5 C16 107.3(5) . . ?
C14 C5 C4 111.9(4) . . ?
C15 C5 C4 108.7(4) . . ?
C16 C5 C4 111.2(4) . . ?
C4 C6 C7 123.3(4) . . ?
C4 C6 H6 118.3 . . ?
C7 C6 H6 118.3 . . ?
C1 C7 C6 119.9(4) . . ?
C1 C7 C8 123.5(4) . . ?
C6 C7 C8 116.6(4) . . ?
N1 C8 C7 126.1(4) . . ?
N1 C8 H8 117.0 . . ?
C7 C8 H8 117.0 . . ?
N2 C9 C2 125.9(4) . . ?
N2 C9 H9 117.1 . . ?
C2 C9 H9 117.1 . . ?
N2 C10 C11 107.0(4) . . ?
N2 C10 H10A 110.3 . . ?
C11 C10 H10A 110.3 . . ?
N2 C10 H10B 110.3 . . ?
C11 C10 H10B 110.3 . . ?
H10A C10 H10B 108.6 . . ?
N4 C11 C10 110.9(4) . . ?
N4 C11 H11A 109.5 . . ?
C10 C11 H11A 109.5 . . ?
N4 C11 H11B 109.5 . . ?
C10 C11 H11B 109.5 . . ?
H11A C11 H11B 108.1 . . ?
N1 C12 C13 107.2(4) . . ?
N1 C12 H12A 110.3 . . ?
C13 C12 H12A 110.3 . . ?
N1 C12 H12B 110.3 . . ?
C13 C12 H12B 110.3 . . ?
H12A C12 H12B 108.5 . . ?
N3 C13 C12 111.0(4) . . ?
N3 C13 H13A 109.4 . . ?
C12 C13 H13A 109.4 . . ?
N3 C13 H13B 109.4 . . ?
C12 C13 H13B 109.4 . . ?
H13A C13 H13B 108.0 . . ?
C5 C14 H14A 109.5 . . ?
C5 C14 H14B 109.5 . . ?
H14A C14 H14B 109.5 . . ?
C5 C14 H14C 109.5 . . ?
H14A C14 H14C 109.5 . . ?
H14B C14 H14C 109.5 . . ?
C5 C15 H15A 109.5 . . ?
C5 C15 H15B 109.5 . . ?
H15A C15 H15B 109.5 . . ?
C5 C15 H15C 109.5 . . ?
H15A C15 H15C 109.5 . . ?
H15B C15 H15C 109.5 . . ?
C5 C16 H16A 109.5 . . ?
C5 C16 H16B 109.5 . . ?
H16A C16 H16B 109.5 . . ?
C5 C16 H16C 109.5 . . ?
H16A C16 H16C 109.5 . . ?
H16B C16 H16C 109.5 . . ?
N3 C17 C18 113.2(4) . . ?
N3 C17 H17A 108.9 . . ?
C18 C17 H17A 108.9 . . ?
N3 C17 H17B 108.9 . . ?
C18 C17 H17B 108.9 . . ?
H17A C17 H17B 107.8 . . ?
C19 C18 C17 112.1(4) . . ?
C19 C18 H18A 109.2 . . ?
C17 C18 H18A 109.2 . . ?
C19 C18 H18B 109.2 . . ?
C17 C18 H18B 109.2 . . ?
H18A C18 H18B 107.9 . . ?
C18 C19 C20 110.8(4) . . ?
C18 C19 H19A 109.5 . . ?
C20 C19 H19A 109.5 . . ?
C18 C19 H19B 109.5 . . ?
C20 C19 H19B 109.5 . . ?
H19A C19 H19B 108.1 . . ?
C21 C20 C19 110.1(4) . . ?
C21 C20 H20A 109.6 . . ?
C19 C20 H20A 109.6 . . ?
C21 C20 H20B 109.6 . . ?
C19 C20 H20B 109.6 . . ?
H20A C20 H20B 108.1 . . ?
N3 C21 C20 113.2(4) . . ?
N3 C21 H21A 108.9 . . ?
C20 C21 H21A 108.9 . . ?
N3 C21 H21B 108.9 . . ?
C20 C21 H21B 108.9 . . ?
H21A C21 H21B 107.8 . . ?
N4 C22 C23 113.4(4) . . ?
N4 C22 H22A 108.9 . . ?
C23 C22 H22A 108.9 . . ?
N4 C22 H22B 108.9 . . ?
C23 C22 H22B 108.9 . . ?
H22A C22 H22B 107.7 . . ?
C24 C23 C22 110.2(4) . . ?
C24 C23 H23A 109.6 . . ?
C22 C23 H23A 109.6 . . ?
C24 C23 H23B 109.6 . . ?
C22 C23 H23B 109.6 . . ?
H23A C23 H23B 108.1 . . ?
C23 C24 C25 110.6(4) . . ?
C23 C24 H24A 109.5 . . ?
C25 C24 H24A 109.5 . . ?
C23 C24 H24B 109.5 . . ?
C25 C24 H24B 109.5 . . ?
H24A C24 H24B 108.1 . . ?
C26 C25 C24 111.7(4) . . ?
C26 C25 H25A 109.3 . . ?
C24 C25 H25A 109.3 . . ?
C26 C25 H25B 109.3 . . ?
C24 C25 H25B 109.3 . . ?
H25A C25 H25B 107.9 . . ?
N4 C26 C25 113.7(4) . . ?
N4 C26 H26A 108.8 . . ?
C25 C26 H26A 108.8 . . ?
N4 C26 H26B 108.8 . . ?
C25 C26 H26B 108.8 . . ?
H26A C26 H26B 107.7 . . ?
O8 N6 O6 118.7(13) . . ?
O8 N6 O7 127.6(14) . . ?
O6 N6 O7 113.6(12) . . ?
 
loop_
 _geom_torsion_atom_site_label_1
 _geom_torsion_atom_site_label_2
 _geom_torsion_atom_site_label_3
 _geom_torsion_atom_site_label_4
 _geom_torsion
 _geom_torsion_site_symmetry_1
 _geom_torsion_site_symmetry_2
 _geom_torsion_site_symmetry_3
 _geom_torsion_site_symmetry_4
 _geom_torsion_publ_flag
N1 Cu1 Cu2 O2 163.0(2) . . . . ?
O1 Cu1 Cu2 O2 152.9(2) . . . . ?
N3 Cu1 Cu2 O2 -21.2(2) . . . . ?
O3 Cu1 Cu2 O2 -108.11(19) . . . . ?
O2 Cu1 Cu2 N2 -162.7(2) . . . . ?
N1 Cu1 Cu2 N2 0.3(2) . . . . ?
O1 Cu1 Cu2 N2 -9.81(19) . . . . ?
N3 Cu1 Cu2 N2 176.0(2) . . . . ?
O3 Cu1 Cu2 N2 89.16(19) . . . . ?
O2 Cu1 Cu2 O1 -152.9(2) . . . . ?
N1 Cu1 Cu2 O1 10.1(2) . . . . ?
N3 Cu1 Cu2 O1 -174.1(2) . . . . ?
O3 Cu1 Cu2 O1 98.98(16) . . . . ?
O2 Cu1 Cu2 N4 22.4(2) . . . . ?
N1 Cu1 Cu2 N4 -174.6(2) . . . . ?
O1 Cu1 Cu2 N4 175.3(2) . . . . ?
N3 Cu1 Cu2 N4 1.1(2) . . . . ?
O3 Cu1 Cu2 N4 -85.76(19) . . . . ?
O2 Cu1 Cu2 O4 108.82(19) . . . . ?
N1 Cu1 Cu2 O4 -88.2(2) . . . . ?
O1 Cu1 Cu2 O4 -98.27(16) . . . . ?
N3 Cu1 Cu2 O4 87.58(19) . . . . ?
O3 Cu1 Cu2 O4 0.70(13) . . . . ?
O2 Cu1 O1 C1 161.5(3) . . . . ?
N1 Cu1 O1 C1 -28.3(3) . . . . ?
O3 Cu1 O1 C1 67.1(3) . . . . ?
Cu2 Cu1 O1 C1 144.2(4) . . . . ?
O2 Cu1 O1 Cu2 17.30(13) . . . . ?
N1 Cu1 O1 Cu2 -172.52(15) . . . . ?
O3 Cu1 O1 Cu2 -77.13(13) . . . . ?
O2 Cu2 O1 C1 -161.5(3) . . . . ?
N2 Cu2 O1 C1 28.5(3) . . . . ?
O4 Cu2 O1 C1 -65.8(3) . . . . ?
Cu1 Cu2 O1 C1 -144.2(4) . . . . ?
O2 Cu2 O1 Cu1 -17.33(13) . . . . ?
N2 Cu2 O1 Cu1 172.69(14) . . . . ?
O4 Cu2 O1 Cu1 78.41(13) . . . . ?
N2 Cu2 O2 Cu1 61.9(6) . . . . ?
O1 Cu2 O2 Cu1 18.14(14) . . . . ?
N4 Cu2 O2 Cu1 -165.97(15) . . . . ?
O4 Cu2 O2 Cu1 -70.28(16) . . . . ?
N1 Cu1 O2 Cu2 -62.5(6) . . . . ?
O1 Cu1 O2 Cu2 -18.21(14) . . . . ?
N3 Cu1 O2 Cu2 166.65(15) . . . . ?
O3 Cu1 O2 Cu2 70.13(16) . . . . ?
O2 Cu1 O3 N5 -31.6(4) . . . . ?
N1 Cu1 O3 N5 138.0(4) . . . . ?
O1 Cu1 O3 N5 48.0(4) . . . . ?
N3 Cu1 O3 N5 -135.3(4) . . . . ?
Cu2 Cu1 O3 N5 6.2(4) . . . . ?
O2 Cu2 O4 N5 29.4(4) . . . . ?
N2 Cu2 O4 N5 -139.8(4) . . . . ?
O1 Cu2 O4 N5 -50.0(4) . . . . ?
N4 Cu2 O4 N5 133.4(4) . . . . ?
Cu1 Cu2 O4 N5 -8.3(4) . . . . ?
O2 Cu1 N1 C8 64.2(8) . . . . ?
O1 Cu1 N1 C8 20.8(4) . . . . ?
N3 Cu1 N1 C8 -163.3(4) . . . . ?
O3 Cu1 N1 C8 -68.3(4) . . . . ?
Cu2 Cu1 N1 C8 14.0(5) . . . . ?
O2 Cu1 N1 C12 -124.1(6) . . . . ?
O1 Cu1 N1 C12 -167.5(4) . . . . ?
N3 Cu1 N1 C12 8.3(4) . . . . ?
O3 Cu1 N1 C12 103.4(4) . . . . ?
Cu2 Cu1 N1 C12 -174.3(3) . . . . ?
O2 Cu2 N2 C9 -62.7(8) . . . . ?
O1 Cu2 N2 C9 -19.8(4) . . . . ?
N4 Cu2 N2 C9 163.6(4) . . . . ?
O4 Cu2 N2 C9 69.6(4) . . . . ?
Cu1 Cu2 N2 C9 -13.2(5) . . . . ?
O2 Cu2 N2 C10 124.9(6) . . . . ?
O1 Cu2 N2 C10 167.8(4) . . . . ?
N4 Cu2 N2 C10 -8.8(4) . . . . ?
O4 Cu2 N2 C10 -102.8(4) . . . . ?
Cu1 Cu2 N2 C10 174.3(3) . . . . ?
O2 Cu1 N3 C13 -173.7(3) . . . . ?
N1 Cu1 N3 C13 17.0(3) . . . . ?
O3 Cu1 N3 C13 -78.1(3) . . . . ?
Cu2 Cu1 N3 C13 -159.8(3) . . . . ?
O2 Cu1 N3 C21 -55.6(3) . . . . ?
N1 Cu1 N3 C21 135.1(3) . . . . ?
O3 Cu1 N3 C21 40.0(3) . . . . ?
Cu2 Cu1 N3 C21 -41.7(4) . . . . ?
O2 Cu1 N3 C17 64.0(3) . . . . ?
N1 Cu1 N3 C17 -105.4(3) . . . . ?
O3 Cu1 N3 C17 159.6(3) . . . . ?
Cu2 Cu1 N3 C17 77.8(3) . . . . ?
O2 Cu2 N4 C22 54.8(3) . . . . ?
N2 Cu2 N4 C22 -136.0(3) . . . . ?
O4 Cu2 N4 C22 -41.9(3) . . . . ?
Cu1 Cu2 N4 C22 40.2(4) . . . . ?
O2 Cu2 N4 C11 173.9(3) . . . . ?
N2 Cu2 N4 C11 -16.9(3) . . . . ?
O4 Cu2 N4 C11 77.2(3) . . . . ?
Cu1 Cu2 N4 C11 159.3(2) . . . . ?
O2 Cu2 N4 C26 -64.9(3) . . . . ?
N2 Cu2 N4 C26 104.3(3) . . . . ?
O4 Cu2 N4 C26 -161.6(3) . . . . ?
Cu1 Cu2 N4 C26 -79.4(3) . . . . ?
Cu1 O3 N5 O5 167.3(3) . . . . ?
Cu1 O3 N5 O4 -14.0(6) . . . . ?
Cu2 O4 N5 O5 -166.2(3) . . . . ?
Cu2 O4 N5 O3 15.1(6) . . . . ?
Cu1 O1 C1 C7 23.3(5) . . . . ?
Cu2 O1 C1 C7 156.9(3) . . . . ?
Cu1 O1 C1 C2 -157.9(3) . . . . ?
Cu2 O1 C1 C2 -24.3(5) . . . . ?
O1 C1 C2 C3 -178.7(4) . . . . ?
C7 C1 C2 C3 0.2(6) . . . . ?
O1 C1 C2 C9 2.9(7) . . . . ?
C7 C1 C2 C9 -178.3(4) . . . . ?
C1 C2 C3 C4 -1.2(7) . . . . ?
C9 C2 C3 C4 177.4(4) . . . . ?
C2 C3 C4 C6 1.7(7) . . . . ?
C2 C3 C4 C5 -179.1(4) . . . . ?
C3 C4 C5 C14 32.0(7) . . . . ?
C6 C4 C5 C14 -149.0(6) . . . . ?
C3 C4 C5 C15 -88.9(6) . . . . ?
C6 C4 C5 C15 90.1(6) . . . . ?
C3 C4 C5 C16 153.2(6) . . . . ?
C6 C4 C5 C16 -27.8(7) . . . . ?
C3 C4 C6 C7 -1.4(7) . . . . ?
C5 C4 C6 C7 179.5(4) . . . . ?
O1 C1 C7 C6 179.0(4) . . . . ?
C2 C1 C7 C6 0.1(6) . . . . ?
O1 C1 C7 C8 -2.0(7) . . . . ?
C2 C1 C7 C8 179.1(4) . . . . ?
C4 C6 C7 C1 0.5(7) . . . . ?
C4 C6 C7 C8 -178.6(4) . . . . ?
C12 N1 C8 C7 179.8(5) . . . . ?
Cu1 N1 C8 C7 -9.1(7) . . . . ?
C1 C7 C8 N1 -5.6(8) . . . . ?
C6 C7 C8 N1 173.5(5) . . . . ?
C10 N2 C9 C2 179.6(5) . . . . ?
Cu2 N2 C9 C2 7.7(7) . . . . ?
C3 C2 C9 N2 -172.4(5) . . . . ?
C1 C2 C9 N2 6.1(8) . . . . ?
C9 N2 C10 C11 -140.6(5) . . . . ?
Cu2 N2 C10 C11 32.4(5) . . . . ?
C22 N4 C11 C10 159.7(4) . . . . ?
C26 N4 C11 C10 -78.8(5) . . . . ?
Cu2 N4 C11 C10 39.6(4) . . . . ?
N2 C10 C11 N4 -48.1(6) . . . . ?
C8 N1 C12 C13 140.7(5) . . . . ?
Cu1 N1 C12 C13 -31.5(5) . . . . ?
C21 N3 C13 C12 -158.4(4) . . . . ?
C17 N3 C13 C12 79.5(5) . . . . ?
Cu1 N3 C13 C12 -39.2(5) . . . . ?
N1 C12 C13 N3 47.3(6) . . . . ?
C13 N3 C17 C18 67.3(6) . . . . ?
C21 N3 C17 C18 -55.2(5) . . . . ?
Cu1 N3 C17 C18 -176.3(4) . . . . ?
N3 C17 C18 C19 54.1(6) . . . . ?
C17 C18 C19 C20 -52.1(6) . . . . ?
C18 C19 C20 C21 53.4(6) . . . . ?
C13 N3 C21 C20 -67.7(5) . . . . ?
C17 N3 C21 C20 57.7(5) . . . . ?
Cu1 N3 C21 C20 177.2(3) . . . . ?
C19 C20 C21 N3 -57.8(6) . . . . ?
C11 N4 C22 C23 66.9(5) . . . . ?
C26 N4 C22 C23 -57.4(5) . . . . ?
Cu2 N4 C22 C23 -177.5(3) . . . . ?
N4 C22 C23 C24 58.3(6) . . . . ?
C22 C23 C24 C25 -53.9(6) . . . . ?
C23 C24 C25 C26 52.3(6) . . . . ?
C22 N4 C26 C25 55.0(5) . . . . ?
C11 N4 C26 C25 -67.6(5) . . . . ?
Cu2 N4 C26 C25 176.7(3) . . . . ?
C24 C25 C26 N4 -54.1(6) . . . . ?
 
_diffrn_measured_fraction_theta_max    0.987
_diffrn_reflns_theta_full              25.27
_diffrn_measured_fraction_theta_full   0.987
_refine_diff_density_max    1.249
_refine_diff_density_min   -0.401
_refine_diff_density_rms    0.098

#===END

 
data_3 

# start Validation Reply Form
_vrf_PLAT029_3 
;
PROBLEM: diffrn_measured_fraction_theta_full Low 0.924
RESPONSE: The value is due to a low diffracting crystal and 
          disordered nitrate
;
# end Validation Reply Form
 
_audit_creation_method            SHELXL-97 
_chemical_name_systematic 
; 
 ? 
; 
_chemical_name_common             ? 
_chemical_melting_point           ? 
_chemical_formula_moiety          
 'C32 H46 Cu2 N4 O6, 4(N O3), 2(H2 O)'  
_chemical_formula_sum 
 'C32 H50 Cu2 N8 O20' 
_chemical_formula_weight          993.88 
 
loop_ 
 _atom_type_symbol 
 _atom_type_description 
 _atom_type_scat_dispersion_real 
 _atom_type_scat_dispersion_imag 
 _atom_type_scat_source 
 'C'  'C'   0.0033   0.0016 
 'International Tables Vol C Tables 4.2.6.8 and 6.1.1.4' 
 'H'  'H'   0.0000   0.0000 
 'International Tables Vol C Tables 4.2.6.8 and 6.1.1.4' 
 'N'  'N'   0.0061   0.0033 
 'International Tables Vol C Tables 4.2.6.8 and 6.1.1.4' 
 'O'  'O'   0.0106   0.0060 
 'International Tables Vol C Tables 4.2.6.8 and 6.1.1.4' 
 'Cu'  'Cu'   0.3201   1.2651 
 'International Tables Vol C Tables 4.2.6.8 and 6.1.1.4' 
 
_symmetry_cell_setting            'triclinic'
_symmetry_space_group_name_H-M    'P -1'
 
loop_ 
 _symmetry_equiv_pos_as_xyz 
 'x, y, z' 
 '-x, -y, -z' 
 
_cell_length_a                    10.059(3) 
_cell_length_b                    10.470(3) 
_cell_length_c                    11.463(4) 
_cell_angle_alpha                 77.391(3) 
_cell_angle_beta                  89.205(3) 
_cell_angle_gamma                 66.130(3) 
_cell_volume                      1073.6(6) 
_cell_formula_units_Z             1 
_cell_measurement_temperature     296(2) 
_cell_measurement_reflns_used     ? 
_cell_measurement_theta_min       ? 
_cell_measurement_theta_max       ? 
 
_exptl_crystal_description        'block' 
_exptl_crystal_colour             'green' 
_exptl_crystal_size_max           0.27
_exptl_crystal_size_mid           0.25
_exptl_crystal_size_min           0.25 
_exptl_crystal_density_meas       ? 
_exptl_crystal_density_diffrn     1.537 
_exptl_crystal_density_method     'not measured' 
_exptl_crystal_F_000              516 
_exptl_absorpt_coefficient_mu     1.077 
_exptl_absorpt_correction_type    'MULTI-SCAN'
_exptl_absorpt_correction_T_min      0.6893
_exptl_absorpt_correction_T_max      0.7752
_exptl_absorpt_process_details    'BRUKER SADABS'
 
_exptl_special_details 
; 
 ? 
; 
 
_diffrn_ambient_temperature       296(2) 
_diffrn_radiation_wavelength      0.71073 
_diffrn_radiation_type            MoK\a 
_diffrn_radiation_source          'fine-focus sealed tube'
_diffrn_radiation_monochromator   graphite 
_diffrn_measurement_device_type   'BRUKER SMART APEX CCD DIFFRACTOMETER' 
_diffrn_measurement_method        'OMEGA-PHI SCAN' 
_diffrn_detector_area_resol_mean  ? 
_diffrn_standards_number          ? 
_diffrn_standards_interval_count  ? 
_diffrn_standards_interval_time   ? 
_diffrn_standards_decay_%         ? 
_diffrn_reflns_number             7278 
_diffrn_reflns_av_R_equivalents   0.0284 
_diffrn_reflns_av_sigmaI/netI     0.0553 
_diffrn_reflns_limit_h_min        -12 
_diffrn_reflns_limit_h_max        12 
_diffrn_reflns_limit_k_min        -11 
_diffrn_reflns_limit_k_max        12 
_diffrn_reflns_limit_l_min        -13 
_diffrn_reflns_limit_l_max        13 
_diffrn_reflns_theta_min          1.83 
_diffrn_reflns_theta_max          25.72 
_reflns_number_total              3993 
_reflns_number_gt                 2599 
_reflns_threshold_expression      >2sigma(I) 
 
_computing_data_collection        'BRUKER SMART' 
_computing_cell_refinement        'BRUKER SMART' 
_computing_data_reduction         'BRUKER SAINT' 
_computing_structure_solution     'SHELX97 (Sheldrick, 2008)'
_computing_structure_refinement   'SHELX97 (Sheldrick, 2008)'
_computing_molecular_graphics     'Ortep3 for Windows (Farrugia,1997)'
_computing_publication_material   'Wingx 1.80.05 (Farrugia, 1999)'
 
_refine_special_details 
; 
 Refinement of F^2^ against ALL reflections.  The weighted R-factor wR and 
 goodness of fit S are based on F^2^, conventional R-factors R are based 
 on F, with F set to zero for negative F^2^. The threshold expression of 
 F^2^ > 2sigma(F^2^) is used only for calculating R-factors(gt) etc. and is 
 not relevant to the choice of reflections for refinement.  R-factors based 
 on F^2^ are statistically about twice as large as those based on F, and R- 
 factors based on ALL data will be even larger. 
; 
 
_refine_ls_structure_factor_coef  Fsqd  
_refine_ls_matrix_type            full 
_refine_ls_weighting_scheme       calc  
_refine_ls_weighting_details 
 'calc w=1/[\s^2^(Fo^2^)+(0.1506P)^2^+0.8400P] where P=(Fo^2^+2Fc^2^)/3' 
_atom_sites_solution_primary      direct 
_atom_sites_solution_secondary    difmap 
_atom_sites_solution_hydrogens    geom 
_refine_ls_hydrogen_treatment     mixed 
_refine_ls_extinction_method      none 
_refine_ls_extinction_coef        ? 
_refine_ls_number_reflns          3993 
_refine_ls_number_parameters      300 
_refine_ls_number_restraints      21 
_refine_ls_R_factor_all           0.1093 
_refine_ls_R_factor_gt            0.0756 
_refine_ls_wR_factor_ref          0.2392 
_refine_ls_wR_factor_gt           0.2114 
_refine_ls_goodness_of_fit_ref    1.039 
_refine_ls_restrained_S_all       1.037 
_refine_ls_shift/su_max           0.000 
_refine_ls_shift/su_mean          0.000 
 
loop_ 
 _atom_site_label 
 _atom_site_type_symbol 
 _atom_site_fract_x 
 _atom_site_fract_y 
 _atom_site_fract_z 
 _atom_site_U_iso_or_equiv 
 _atom_site_adp_type 
 _atom_site_occupancy 
 _atom_site_symmetry_multiplicity 
 _atom_site_calc_flag 
 _atom_site_refinement_flags 
 _atom_site_disorder_assembly 
 _atom_site_disorder_group 
Cu1 Cu 0.35391(7) 0.11983(8) 0.45122(6) 0.0521(3) Uani 1 1 d . . . 
N1 N 0.1739(5) 0.2080(5) 0.5266(4) 0.0528(12) Uani 1 1 d . A . 
N2 N -0.1421(6) 0.3670(6) 0.2769(6) 0.0754(17) Uani 1 1 d . . . 
O1 O 0.4614(4) -0.0012(5) 0.6025(3) 0.0555(11) Uani 1 1 d . . . 
O2 O 0.7301(5) -0.2160(6) 0.7124(4) 0.0773(14) Uani 1 1 d . . . 
O1W O 0.4211(8) 0.2973(7) 0.4561(9) 0.122(3) Uani 1 1 d D . . 
H11 H 0.379(11) 0.385(4) 0.425(12) 0.183 Uiso 1 1 d D . . 
H12 H 0.504(7) 0.281(11) 0.485(12) 0.183 Uiso 1 1 d D . . 
C1 C 0.4132(6) -0.0153(7) 0.7101(5) 0.0487(14) Uani 1 1 d . . . 
C2 C 0.5095(7) -0.1130(7) 0.8101(5) 0.0580(16) Uani 1 1 d . . . 
C3 C 0.4566(8) -0.1249(8) 0.9243(6) 0.0674(18) Uani 1 1 d . . . 
H3 H 0.5209 -0.1854 0.9904 0.081 Uiso 1 1 calc R . . 
C4 C 0.3089(9) -0.0479(8) 0.9417(6) 0.0719(19) Uani 1 1 d . . . 
C5 C 0.2202(8) 0.0436(8) 0.8458(6) 0.0652(18) Uani 1 1 d . . . 
H5 H 0.1229 0.0957 0.8567 0.078 Uiso 1 1 calc R . . 
C6 C 0.2671(7) 0.0652(7) 0.7280(5) 0.0541(15) Uani 1 1 d . . . 
C7 C 0.1579(7) 0.1727(7) 0.6354(6) 0.0589(16) Uani 1 1 d . . . 
H7 H 0.0659 0.2204 0.6598 0.071 Uiso 1 1 calc R . . 
C8 C 0.0456(8) 0.3224(9) 0.4500(8) 0.081(2) Uani 1 1 d . . . 
H8A H 0.0757 0.3885 0.3952 0.097 Uiso 1 1 calc R A . 
H8B H -0.0244 0.3759 0.4996 0.097 Uiso 1 1 calc R . . 
C9 C -0.0261(8) 0.2542(9) 0.3780(8) 0.086(2) Uani 1 1 d . A . 
H9A H -0.0722 0.2030 0.4326 0.103 Uiso 1 1 calc R . . 
H9B H 0.0492 0.1849 0.3425 0.103 Uiso 1 1 calc R . . 
C10 C -0.1904(18) 0.2954(15) 0.2002(14) 0.071(4) Uiso 0.574(19) 1 d P A 1 
H10A H -0.1098 0.2442 0.1572 0.085 Uiso 0.574(19) 1 calc PR A 1 
H10B H -0.2212 0.2262 0.2498 0.085 Uiso 0.574(19) 1 calc PR A 1 
C11 C -0.3096(17) 0.3992(15) 0.1159(13) 0.074(4) Uiso 0.574(19) 1 d P A 1 
H11A H -0.2717 0.4557 0.0579 0.089 Uiso 0.574(19) 1 calc PR A 1 
H11B H -0.3448 0.3475 0.0727 0.089 Uiso 0.574(19) 1 calc PR A 1 
C12 C -0.4319(19) 0.496(2) 0.1635(16) 0.078(5) Uiso 0.574(19) 1 d P A 1 
H12A H -0.4889 0.4453 0.2012 0.094 Uiso 0.574(19) 1 calc PR A 1 
H12B H -0.4935 0.5729 0.0978 0.094 Uiso 0.574(19) 1 calc PR A 1 
C13 C -0.391(2) 0.560(2) 0.2517(17) 0.091(5) Uiso 0.574(19) 1 d P A 1 
H13A H -0.4763 0.6052 0.2931 0.109 Uiso 0.574(19) 1 calc PR A 1 
H13B H -0.3633 0.6352 0.2089 0.109 Uiso 0.574(19) 1 calc PR A 1 
C14 C -0.2705(15) 0.4584(14) 0.3424(12) 0.065(4) Uiso 0.574(19) 1 d P A 1 
H14A H -0.3039 0.3960 0.3985 0.078 Uiso 0.574(19) 1 calc PR A 1 
H14B H -0.2379 0.5107 0.3869 0.078 Uiso 0.574(19) 1 calc PR A 1 
C10A C -0.238(3) 0.300(2) 0.236(2) 0.077(6) Uiso 0.426(19) 1 d P A 2 
H10C H -0.2614 0.2448 0.3065 0.092 Uiso 0.426(19) 1 calc PR A 2 
H10D H -0.1834 0.2349 0.1875 0.092 Uiso 0.426(19) 1 calc PR A 2 
C11A C -0.390(3) 0.418(3) 0.160(2) 0.095(8) Uiso 0.426(19) 1 d P A 2 
H11C H -0.3714 0.4480 0.0771 0.115 Uiso 0.426(19) 1 calc PR A 2 
H11D H -0.4593 0.3753 0.1600 0.115 Uiso 0.426(19) 1 calc PR A 2 
C12A C -0.448(3) 0.537(3) 0.211(3) 0.099(8) Uiso 0.426(19) 1 d P A 2 
H12C H -0.4854 0.5085 0.2857 0.119 Uiso 0.426(19) 1 calc PR A 2 
H12D H -0.5303 0.6103 0.1577 0.119 Uiso 0.426(19) 1 calc PR A 2 
C13A C -0.353(2) 0.602(2) 0.2348(16) 0.061(5) Uiso 0.426(19) 1 d P A 2 
H13C H -0.4056 0.6793 0.2739 0.074 Uiso 0.426(19) 1 calc PR A 2 
H13D H -0.3241 0.6424 0.1598 0.074 Uiso 0.426(19) 1 calc PR A 2 
C14A C -0.222(2) 0.496(2) 0.3125(19) 0.079(6) Uiso 0.426(19) 1 d P A 2 
H14C H -0.1573 0.5416 0.3193 0.095 Uiso 0.426(19) 1 calc PR A 2 
H14D H -0.2523 0.4708 0.3920 0.095 Uiso 0.426(19) 1 calc PR A 2 
C15 C 0.2591(11) -0.0702(11) 1.0678(7) 0.102(3) Uani 1 1 d . . . 
H15A H 0.2243 -0.1447 1.0799 0.153 Uiso 1 1 calc R . . 
H15B H 0.1819 0.0175 1.0774 0.153 Uiso 1 1 calc R . . 
H15C H 0.3396 -0.0974 1.1256 0.153 Uiso 1 1 calc R . . 
C16 C 0.6586(8) -0.2015(9) 0.8037(6) 0.075(2) Uani 1 1 d . . . 
H16 H 0.7108 -0.2564 0.8768 0.090 Uiso 1 1 calc R . . 
N3 N 0.2339(7) -0.1365(7) 0.3934(6) 0.0722(16) Uani 1 1 d D . . 
O21 O 0.2453(9) -0.0676(9) 0.4646(8) 0.095(3) Uani 0.763(16) 1 d PD . . 
O22 O 0.118(2) -0.099(3) 0.335(2) 0.132(6) Uani 0.763(16) 1 d PD . . 
O23 O 0.3386(10) -0.2531(10) 0.3915(11) 0.109(3) Uani 0.763(16) 1 d PD . . 
O21A O 0.274(2) -0.0390(19) 0.364(2) 0.074(6) Uiso 0.237(16) 1 d PD . . 
O22A O 0.124(4) -0.097(6) 0.325(5) 0.074(6) Uiso 0.237(16) 1 d PD . . 
O23A O 0.304(3) -0.2625(19) 0.446(2) 0.074(6) Uiso 0.237(16) 1 d PD . . 
N4 N 0.0298(18) 0.3715(10) 0.9019(9) 0.133(4) Uani 1 1 d . . . 
O24 O 0.104(2) 0.3455(16) 0.9731(18) 0.363(16) Uani 1 1 d . . . 
O25 O 0.0004(12) 0.4426(13) 0.8061(9) 0.185(4) Uani 1 1 d . . . 
O26 O -0.0669(17) 0.3288(15) 0.9282(12) 0.222(7) Uani 1 1 d . . . 
O2W O 0.2246(8) 0.5585(6) 0.3423(7) 0.110(2) Uani 1 1 d D . . 
H21 H 0.166(11) 0.587(12) 0.280(7) 0.165 Uiso 1 1 d D . . 
H22 H 0.265(12) 0.618(10) 0.332(10) 0.165 Uiso 1 1 d D . . 
 
loop_ 
 _atom_site_aniso_label 
 _atom_site_aniso_U_11 
 _atom_site_aniso_U_22 
 _atom_site_aniso_U_33 
 _atom_site_aniso_U_23 
 _atom_site_aniso_U_13 
 _atom_site_aniso_U_12 
Cu1 0.0367(4) 0.0623(5) 0.0426(5) -0.0056(3) -0.0034(3) -0.0088(3) 
N1 0.040(3) 0.056(3) 0.052(3) -0.009(2) 0.000(2) -0.011(2) 
N2 0.038(3) 0.061(4) 0.118(5) -0.022(3) -0.010(3) -0.011(3) 
O1 0.033(2) 0.075(3) 0.042(2) -0.0060(19) -0.0028(16) -0.0092(19) 
O2 0.045(3) 0.104(4) 0.055(3) 0.003(2) -0.006(2) -0.012(2) 
O1W 0.088(5) 0.077(4) 0.188(7) 0.002(4) -0.047(5) -0.035(4) 
C1 0.046(3) 0.063(4) 0.037(3) -0.010(3) -0.001(2) -0.024(3) 
C2 0.056(4) 0.071(4) 0.043(3) -0.009(3) -0.002(3) -0.024(3) 
C3 0.070(4) 0.080(5) 0.045(3) -0.007(3) -0.001(3) -0.027(4) 
C4 0.088(5) 0.075(5) 0.051(4) -0.017(3) 0.018(4) -0.031(4) 
C5 0.071(4) 0.071(4) 0.057(4) -0.021(3) 0.019(3) -0.030(4) 
C6 0.056(4) 0.063(4) 0.049(3) -0.021(3) 0.009(3) -0.027(3) 
C7 0.041(3) 0.065(4) 0.067(4) -0.027(3) 0.005(3) -0.012(3) 
C8 0.060(4) 0.083(5) 0.087(5) -0.019(4) -0.004(4) -0.015(4) 
C9 0.059(5) 0.076(5) 0.106(6) -0.002(4) -0.023(4) -0.022(4) 
C15 0.117(7) 0.110(7) 0.060(5) -0.013(4) 0.036(5) -0.033(6) 
C16 0.059(4) 0.099(6) 0.047(4) 0.002(4) -0.009(3) -0.022(4) 
N3 0.067(4) 0.067(4) 0.087(4) -0.017(4) 0.007(3) -0.032(3) 
O21 0.094(6) 0.100(6) 0.114(8) -0.051(5) 0.012(5) -0.050(5) 
O22 0.092(7) 0.172(10) 0.135(11) -0.042(8) -0.028(7) -0.051(7) 
O23 0.084(6) 0.097(6) 0.140(9) -0.047(6) 0.006(6) -0.021(5) 
N4 0.218(13) 0.082(6) 0.074(6) -0.006(4) -0.007(7) -0.042(7) 
O24 0.40(2) 0.209(13) 0.290(18) -0.100(13) -0.267(19) 0.097(14) 
O25 0.193(10) 0.219(11) 0.118(7) -0.011(8) -0.035(7) -0.072(9) 
O26 0.284(16) 0.204(12) 0.212(14) -0.034(10) 0.110(12) -0.145(12) 
O2W 0.099(5) 0.071(4) 0.151(6) -0.024(4) -0.033(4) -0.027(3) 
 
_geom_special_details 
; 
 All esds (except the esd in the dihedral angle between two l.s. planes) 
 are estimated using the full covariance matrix.  The cell esds are taken 
 into account individually in the estimation of esds in distances, angles 
 and torsion angles; correlations between esds in cell parameters are only 
 used when they are defined by crystal symmetry.  An approximate (isotropic) 
 treatment of cell esds is used for estimating esds involving l.s. planes. 
; 
 
loop_ 
 _geom_bond_atom_site_label_1 
 _geom_bond_atom_site_label_2 
 _geom_bond_distance 
 _geom_bond_site_symmetry_2 
 _geom_bond_publ_flag 
Cu1 O1 1.940(4) . ? 
Cu1 O2 1.944(4) 2_656 ? 
Cu1 O1 1.951(4) 2_656 ? 
Cu1 N1 1.957(5) . ? 
Cu1 O1W 2.231(6) . ? 
Cu1 Cu1 3.0137(14) 2_656 ? 
N1 C7 1.248(8) . ? 
N1 C8 1.482(8) . ? 
N2 C14A 1.41(2) . ? 
N2 C10 1.471(15) . ? 
N2 C10A 1.53(2) . ? 
N2 C9 1.557(9) . ? 
N2 C14 1.559(14) . ? 
O1 C1 1.320(7) . ? 
O1 Cu1 1.951(4) 2_656 ? 
O2 C16 1.263(8) . ? 
O2 Cu1 1.944(4) 2_656 ? 
O1W H11 0.84(2) . ? 
O1W H12 0.84(2) . ? 
C1 C6 1.405(9) . ? 
C1 C2 1.420(8) . ? 
C2 C3 1.406(9) . ? 
C2 C16 1.420(10) . ? 
C3 C4 1.411(10) . ? 
C3 H3 0.9300 . ? 
C4 C5 1.341(10) . ? 
C4 C15 1.524(10) . ? 
C5 C6 1.426(9) . ? 
C5 H5 0.9300 . ? 
C6 C7 1.453(9) . ? 
C7 H7 0.9300 . ? 
C8 C9 1.550(11) . ? 
C8 H8A 0.9700 . ? 
C8 H8B 0.9700 . ? 
C9 H9A 0.9700 . ? 
C9 H9B 0.9700 . ? 
C10 C11 1.440(19) . ? 
C10 H10A 0.9700 . ? 
C10 H10B 0.9700 . ? 
C11 C12 1.43(2) . ? 
C11 H11A 0.9700 . ? 
C11 H11B 0.9700 . ? 
C12 C13 1.47(3) . ? 
C12 H12A 0.9700 . ? 
C12 H12B 0.9700 . ? 
C13 C14 1.48(2) . ? 
C13 H13A 0.9700 . ? 
C13 H13B 0.9700 . ? 
C14 H14A 0.9700 . ? 
C14 H14B 0.9700 . ? 
C10A C11A 1.63(3) . ? 
C10A H10C 0.9700 . ? 
C10A H10D 0.9700 . ? 
C11A C12A 1.40(3) . ? 
C11A H11C 0.9700 . ? 
C11A H11D 0.9700 . ? 
C12A C13A 1.43(3) . ? 
C12A H12C 0.9700 . ? 
C12A H12D 0.9700 . ? 
C13A C14A 1.48(3) . ? 
C13A H13C 0.9700 . ? 
C13A H13D 0.9700 . ? 
C14A H14C 0.9700 . ? 
C14A H14D 0.9700 . ? 
C15 H15A 0.9600 . ? 
C15 H15B 0.9600 . ? 
C15 H15C 0.9600 . ? 
C16 H16 0.9300 . ? 
N3 O22 1.226(9) . ? 
N3 O21A 1.227(13) . ? 
N3 O23A 1.229(14) . ? 
N3 O21 1.236(8) . ? 
N3 O22A 1.236(15) . ? 
N3 O23 1.253(8) . ? 
O21 O21A 1.19(2) . ? 
O23 O23A 0.72(2) . ? 
N4 O24 1.027(14) . ? 
N4 O25 1.150(11) . ? 
N4 O26 1.235(17) . ? 
O2W H21 0.85(2) . ? 
O2W H22 0.86(2) . ? 
 
loop_ 
 _geom_angle_atom_site_label_1 
 _geom_angle_atom_site_label_2 
 _geom_angle_atom_site_label_3 
 _geom_angle 
 _geom_angle_site_symmetry_1 
 _geom_angle_site_symmetry_3 
 _geom_angle_publ_flag 
O1 Cu1 O2 170.23(19) . 2_656 ? 
O1 Cu1 O1 78.48(18) . 2_656 ? 
O2 Cu1 O1 92.30(19) 2_656 2_656 ? 
O1 Cu1 N1 93.28(18) . . ? 
O2 Cu1 N1 95.5(2) 2_656 . ? 
O1 Cu1 N1 169.84(19) 2_656 . ? 
O1 Cu1 O1W 94.7(3) . . ? 
O2 Cu1 O1W 89.1(3) 2_656 . ? 
O1 Cu1 O1W 93.9(3) 2_656 . ? 
N1 Cu1 O1W 92.6(3) . . ? 
O1 Cu1 Cu1 39.36(12) . 2_656 ? 
O2 Cu1 Cu1 131.34(15) 2_656 2_656 ? 
O1 Cu1 Cu1 39.12(11) 2_656 2_656 ? 
N1 Cu1 Cu1 132.37(15) . 2_656 ? 
O1W Cu1 Cu1 95.60(18) . 2_656 ? 
C7 N1 C8 117.0(6) . . ? 
C7 N1 Cu1 124.6(4) . . ? 
C8 N1 Cu1 118.4(5) . . ? 
C14A N2 C10 129.3(11) . . ? 
C14A N2 C10A 113.1(13) . . ? 
C14A N2 C9 111.7(10) . . ? 
C10 N2 C9 110.6(7) . . ? 
C10A N2 C9 109.4(9) . . ? 
C10 N2 C14 111.5(9) . . ? 
C10A N2 C14 89.8(10) . . ? 
C9 N2 C14 105.7(7) . . ? 
C1 O1 Cu1 128.5(4) . . ? 
C1 O1 Cu1 129.1(4) . 2_656 ? 
Cu1 O1 Cu1 101.52(18) . 2_656 ? 
C16 O2 Cu1 124.0(4) . 2_656 ? 
Cu1 O1W H11 130(7) . . ? 
Cu1 O1W H12 122(7) . . ? 
H11 O1W H12 107(4) . . ? 
O1 C1 C6 121.1(5) . . ? 
O1 C1 C2 119.9(5) . . ? 
C6 C1 C2 119.0(5) . . ? 
C3 C2 C16 116.5(6) . . ? 
C3 C2 C1 119.1(6) . . ? 
C16 C2 C1 124.5(6) . . ? 
C2 C3 C4 121.9(6) . . ? 
C2 C3 H3 119.0 . . ? 
C4 C3 H3 119.0 . . ? 
C5 C4 C3 117.8(6) . . ? 
C5 C4 C15 123.5(8) . . ? 
C3 C4 C15 118.8(7) . . ? 
C4 C5 C6 123.4(7) . . ? 
C4 C5 H5 118.3 . . ? 
C6 C5 H5 118.3 . . ? 
C1 C6 C5 118.7(6) . . ? 
C1 C6 C7 125.1(5) . . ? 
C5 C6 C7 116.2(6) . . ? 
N1 C7 C6 127.2(6) . . ? 
N1 C7 H7 116.4 . . ? 
C6 C7 H7 116.4 . . ? 
N1 C8 C9 109.5(6) . . ? 
N1 C8 H8A 109.8 . . ? 
C9 C8 H8A 109.8 . . ? 
N1 C8 H8B 109.8 . . ? 
C9 C8 H8B 109.8 . . ? 
H8A C8 H8B 108.2 . . ? 
C8 C9 N2 112.9(6) . . ? 
C8 C9 H9A 109.0 . . ? 
N2 C9 H9A 109.0 . . ? 
C8 C9 H9B 109.0 . . ? 
N2 C9 H9B 109.0 . . ? 
H9A C9 H9B 107.8 . . ? 
C11 C10 N2 110.4(11) . . ? 
C11 C10 H10A 109.6 . . ? 
N2 C10 H10A 109.6 . . ? 
C11 C10 H10B 109.6 . . ? 
N2 C10 H10B 109.6 . . ? 
H10A C10 H10B 108.1 . . ? 
C12 C11 C10 117.1(13) . . ? 
C12 C11 H11A 108.0 . . ? 
C10 C11 H11A 108.0 . . ? 
C12 C11 H11B 108.0 . . ? 
C10 C11 H11B 108.0 . . ? 
H11A C11 H11B 107.3 . . ? 
C11 C12 C13 113.8(14) . . ? 
C11 C12 H12A 108.8 . . ? 
C13 C12 H12A 108.8 . . ? 
C11 C12 H12B 108.8 . . ? 
C13 C12 H12B 108.8 . . ? 
H12A C12 H12B 107.7 . . ? 
C12 C13 C14 115.1(14) . . ? 
C12 C13 H13A 108.5 . . ? 
C14 C13 H13A 108.5 . . ? 
C12 C13 H13B 108.5 . . ? 
C14 C13 H13B 108.5 . . ? 
H13A C13 H13B 107.5 . . ? 
C13 C14 N2 108.8(11) . . ? 
C13 C14 H14A 109.9 . . ? 
N2 C14 H14A 109.9 . . ? 
C13 C14 H14B 109.9 . . ? 
N2 C14 H14B 109.9 . . ? 
H14A C14 H14B 108.3 . . ? 
N2 C10A C11A 113.8(16) . . ? 
N2 C10A H10C 108.8 . . ? 
C11A C10A H10C 108.8 . . ? 
N2 C10A H10D 108.8 . . ? 
C11A C10A H10D 108.8 . . ? 
H10C C10A H10D 107.7 . . ? 
C12A C11A C10A 110(2) . . ? 
C12A C11A H11C 109.8 . . ? 
C10A C11A H11C 109.8 . . ? 
C12A C11A H11D 109.8 . . ? 
C10A C11A H11D 109.8 . . ? 
H11C C11A H11D 108.2 . . ? 
C11A C12A C13A 118(2) . . ? 
C11A C12A H12C 107.8 . . ? 
C13A C12A H12C 107.8 . . ? 
C11A C12A H12D 107.8 . . ? 
C13A C12A H12D 107.8 . . ? 
H12C C12A H12D 107.1 . . ? 
C12A C13A C14A 111.0(18) . . ? 
C12A C13A H13C 109.4 . . ? 
C14A C13A H13C 109.4 . . ? 
C12A C13A H13D 109.4 . . ? 
C14A C13A H13D 109.4 . . ? 
H13C C13A H13D 108.0 . . ? 
N2 C14A C13A 117.5(16) . . ? 
N2 C14A H14C 107.9 . . ? 
C13A C14A H14C 107.9 . . ? 
N2 C14A H14D 107.9 . . ? 
C13A C14A H14D 107.9 . . ? 
H14C C14A H14D 107.2 . . ? 
C4 C15 H15A 109.5 . . ? 
C4 C15 H15B 109.5 . . ? 
H15A C15 H15B 109.5 . . ? 
C4 C15 H15C 109.5 . . ? 
H15A C15 H15C 109.5 . . ? 
H15B C15 H15C 109.5 . . ? 
O2 C16 C2 128.9(6) . . ? 
O2 C16 H16 115.6 . . ? 
C2 C16 H16 115.6 . . ? 
O21A N3 O23A 129.5(18) . . ? 
O21A N3 O22A 104(3) . . ? 
O23A N3 O22A 123(3) . . ? 
O22 N3 O21 120.6(16) . . ? 
O22 N3 O23 120.7(16) . . ? 
O21 N3 O23 118.4(8) . . ? 
O24 N4 O25 138(3) . . ? 
O24 N4 O26 113(2) . . ? 
O25 N4 O26 108.3(16) . . ? 
H21 O2W H22 104(3) . . ? 
 
loop_ 
 _geom_torsion_atom_site_label_1 
 _geom_torsion_atom_site_label_2 
 _geom_torsion_atom_site_label_3 
 _geom_torsion_atom_site_label_4 
 _geom_torsion 
 _geom_torsion_site_symmetry_1 
 _geom_torsion_site_symmetry_2 
 _geom_torsion_site_symmetry_3 
 _geom_torsion_site_symmetry_4 
 _geom_torsion_publ_flag 
O1 Cu1 N1 C7 -4.2(6) . . . . ? 
O2 Cu1 N1 C7 171.5(6) 2_656 . . . ? 
O1 Cu1 N1 C7 31.2(14) 2_656 . . . ? 
O1W Cu1 N1 C7 -99.1(6) . . . . ? 
Cu1 Cu1 N1 C7 0.9(7) 2_656 . . . ? 
O1 Cu1 N1 C8 177.3(5) . . . . ? 
O2 Cu1 N1 C8 -6.9(5) 2_656 . . . ? 
O1 Cu1 N1 C8 -147.3(10) 2_656 . . . ? 
O1W Cu1 N1 C8 82.4(5) . . . . ? 
Cu1 Cu1 N1 C8 -177.6(4) 2_656 . . . ? 
O1 Cu1 O1 C1 -170.0(6) 2_656 . . . ? 
N1 Cu1 O1 C1 4.0(5) . . . . ? 
O1W Cu1 O1 C1 96.9(6) . . . . ? 
Cu1 Cu1 O1 C1 -170.0(6) 2_656 . . . ? 
O1 Cu1 O1 Cu1 0.0 2_656 . . 2_656 ? 
N1 Cu1 O1 Cu1 174.0(2) . . . 2_656 ? 
O1W Cu1 O1 Cu1 -93.1(3) . . . 2_656 ? 
Cu1 O1 C1 C6 -1.5(9) . . . . ? 
Cu1 O1 C1 C6 -168.8(4) 2_656 . . . ? 
Cu1 O1 C1 C2 178.6(4) . . . . ? 
Cu1 O1 C1 C2 11.2(8) 2_656 . . . ? 
O1 C1 C2 C3 179.1(6) . . . . ? 
C6 C1 C2 C3 -0.9(9) . . . . ? 
O1 C1 C2 C16 -0.9(10) . . . . ? 
C6 C1 C2 C16 179.2(7) . . . . ? 
C16 C2 C3 C4 -176.9(7) . . . . ? 
C1 C2 C3 C4 3.2(11) . . . . ? 
C2 C3 C4 C5 -3.1(12) . . . . ? 
C2 C3 C4 C15 178.1(7) . . . . ? 
C3 C4 C5 C6 0.8(11) . . . . ? 
C15 C4 C5 C6 179.5(7) . . . . ? 
O1 C1 C6 C5 178.8(6) . . . . ? 
C2 C1 C6 C5 -1.3(9) . . . . ? 
O1 C1 C6 C7 -2.4(10) . . . . ? 
C2 C1 C6 C7 177.6(6) . . . . ? 
C4 C5 C6 C1 1.4(11) . . . . ? 
C4 C5 C6 C7 -177.6(7) . . . . ? 
C8 N1 C7 C6 -179.3(6) . . . . ? 
Cu1 N1 C7 C6 2.2(10) . . . . ? 
C1 C6 C7 N1 2.0(11) . . . . ? 
C5 C6 C7 N1 -179.1(7) . . . . ? 
C7 N1 C8 C9 -102.0(8) . . . . ? 
Cu1 N1 C8 C9 76.5(7) . . . . ? 
N1 C8 C9 N2 -168.5(6) . . . . ? 
C14A N2 C9 C8 -37.1(14) . . . . ? 
C10 N2 C9 C8 171.5(10) . . . . ? 
C10A N2 C9 C8 -163.1(12) . . . . ? 
C14 N2 C9 C8 -67.7(10) . . . . ? 
C14A N2 C10 C11 28(2) . . . . ? 
C10A N2 C10 C11 82(3) . . . . ? 
C9 N2 C10 C11 173.2(11) . . . . ? 
C14 N2 C10 C11 55.9(14) . . . . ? 
N2 C10 C11 C12 -52.2(19) . . . . ? 
C10 C11 C12 C13 46(2) . . . . ? 
C11 C12 C13 C14 -45(2) . . . . ? 
C12 C13 C14 N2 48.7(19) . . . . ? 
C14A N2 C14 C13 79(2) . . . . ? 
C10 N2 C14 C13 -54.8(14) . . . . ? 
C10A N2 C14 C13 -65.0(14) . . . . ? 
C9 N2 C14 C13 -175.1(11) . . . . ? 
C14A N2 C10A C11A 38(2) . . . . ? 
C10 N2 C10A C11A -99(3) . . . . ? 
C9 N2 C10A C11A 163.6(16) . . . . ? 
C14 N2 C10A C11A 57.0(18) . . . . ? 
N2 C10A C11A C12A -40(3) . . . . ? 
C10A C11A C12A C13A 50(3) . . . . ? 
C11A C12A C13A C14A -56(3) . . . . ? 
C10 N2 C14A C13A -24(3) . . . . ? 
C10A N2 C14A C13A -45(2) . . . . ? 
C9 N2 C14A C13A -169.0(15) . . . . ? 
C14 N2 C14A C13A -85(2) . . . . ? 
C12A C13A C14A N2 52(3) . . . . ? 
Cu1 O2 C16 C2 -2.4(13) 2_656 . . . ? 
C3 C2 C16 O2 176.4(8) . . . . ? 
C1 C2 C16 O2 -3.7(13) . . . . ? 
O22 N3 O21 O21A -92(2) . . . . ? 
O23A N3 O21 O21A 128(2) . . . . ? 
O22A N3 O21 O21A -85(4) . . . . ? 
O23 N3 O21 O21A 95.3(16) . . . . ? 
O22 N3 O23 O23A -101(3) . . . . ? 
O21A N3 O23 O23A 134(3) . . . . ? 
O21 N3 O23 O23A 72(3) . . . . ? 
O22A N3 O23 O23A -108(4) . . . . ? 
O22 N3 O21A O21 115.8(18) . . . . ? 
O23A N3 O21A O21 -81(2) . . . . ? 
O22A N3 O21A O21 121(3) . . . . ? 
O23 N3 O21A O21 -112.2(11) . . . . ? 
O22 N3 O23A O23 100(3) . . . . ? 
O21A N3 O23A O23 -61(4) . . . . ? 
O21 N3 O23A O23 -121(3) . . . . ? 
O22A N3 O23A O23 93(5) . . . . ? 
 
_diffrn_measured_fraction_theta_max    0.973 
_diffrn_reflns_theta_full              25.72 
_diffrn_measured_fraction_theta_full   0.973
_refine_diff_density_max    1.367 
_refine_diff_density_min   -0.525 
_refine_diff_density_rms    0.106 

#===END


data_8 

# start Validation Reply Form
_vrf_PLAT780_8
;
PROBLEM: Coordinates do not Form a Properly Connected Set Please Do ! 
RESPONSE: The complex resides on a chrystallographic mirror plane
;
# end Validation Reply Form


_audit_creation_method            SHELXL-97 
_chemical_name_systematic 
; 
 ? 
; 
_chemical_name_common             ? 
_chemical_melting_point           ? 
_chemical_formula_moiety          
'C20 H29 Cl Cu2 N4 O2, 2(N O3), 2(H2 O)' 
_chemical_formula_sum 
 'C20 H33 Cl Cu2 N6 O10' 
_chemical_formula_weight          680.05 
 
loop_ 
 _atom_type_symbol 
 _atom_type_description 
 _atom_type_scat_dispersion_real 
 _atom_type_scat_dispersion_imag 
 _atom_type_scat_source 
 'C'  'C'   0.0033   0.0016 
 'International Tables Vol C Tables 4.2.6.8 and 6.1.1.4' 
 'H'  'H'   0.0000   0.0000 
 'International Tables Vol C Tables 4.2.6.8 and 6.1.1.4' 
 'N'  'N'   0.0061   0.0033 
 'International Tables Vol C Tables 4.2.6.8 and 6.1.1.4' 
 'O'  'O'   0.0106   0.0060 
 'International Tables Vol C Tables 4.2.6.8 and 6.1.1.4' 
 'Cl'  'Cl'   0.1484   0.1585 
 'International Tables Vol C Tables 4.2.6.8 and 6.1.1.4' 
 'Cu'  'Cu'   0.3201   1.2651 
 'International Tables Vol C Tables 4.2.6.8 and 6.1.1.4' 
 
_symmetry_cell_setting            'monoclinic' 
_symmetry_space_group_name_H-M    'P 21/m' 
 
loop_ 
 _symmetry_equiv_pos_as_xyz 
 'x, y, z' 
 '-x, y+1/2, -z' 
 '-x, -y, -z' 
 'x, -y-1/2, z' 
 
_cell_length_a                    8.1106(3) 
_cell_length_b                    12.3324(5) 
_cell_length_c                    13.7055(5) 
_cell_angle_alpha                 90.00 
_cell_angle_beta                  102.507(2) 
_cell_angle_gamma                 90.00 
_cell_volume                      1338.34(9) 
_cell_formula_units_Z             2 
_cell_measurement_temperature     293(2) 
_cell_measurement_reflns_used     ? 
_cell_measurement_theta_min       ? 
_cell_measurement_theta_max       ? 
 
_exptl_crystal_description        'needle'
_exptl_crystal_colour             'green'
_exptl_crystal_size_max           0.37
_exptl_crystal_size_mid           0.15
_exptl_crystal_size_min           0.13   
_exptl_crystal_density_meas       ? 
_exptl_crystal_density_diffrn     1.688 
_exptl_crystal_density_method     'not measured' 
_exptl_crystal_F_000              700 
_exptl_absorpt_coefficient_mu     1.753 
_exptl_absorpt_correction_type    'MULTI-SCAN'
_exptl_absorpt_correction_T_min      0.6423
_exptl_absorpt_correction_T_max      0.6894 
_exptl_absorpt_process_details    'BRUKER SADABS'
 
_exptl_special_details 
; 
 ? 
; 
 
_diffrn_ambient_temperature       293(2) 
_diffrn_radiation_wavelength      0.71073 
_diffrn_radiation_type            MoK\a 
_diffrn_radiation_source          'fine-focus sealed tube'
_diffrn_radiation_monochromator   graphite 
_diffrn_measurement_device_type   'BRUKER SMART APEX CCD DIFFRACTOMETER' 
_diffrn_measurement_method        'OMEGA-PHI SCAN' 
_diffrn_detector_area_resol_mean  ? 
_diffrn_standards_number          ? 
_diffrn_standards_interval_count  ? 
_diffrn_standards_interval_time   ? 
_diffrn_standards_decay_%         ? 
_diffrn_reflns_number             24430 
_diffrn_reflns_av_R_equivalents   0.0358 
_diffrn_reflns_av_sigmaI/netI     0.0420 
_diffrn_reflns_limit_h_min        -13 
_diffrn_reflns_limit_h_max        14 
_diffrn_reflns_limit_k_min        -19 
_diffrn_reflns_limit_k_max        21 
_diffrn_reflns_limit_l_min        -23 
_diffrn_reflns_limit_l_max        23 
_diffrn_reflns_theta_min          1.52 
_diffrn_reflns_theta_max          38.18 
_reflns_number_total              7253 
_reflns_number_gt                 5170 
_reflns_threshold_expression      >2sigma(I) 
 
_computing_data_collection        'BRUKER SMART' 
_computing_cell_refinement        'BRUKER SMART' 
_computing_data_reduction         'BRUKER SAINT' 
_computing_structure_solution     'SHELX97 (Sheldrick, 2008)'
_computing_structure_refinement   'SHELX97 (Sheldrick, 2008)'
_computing_molecular_graphics     'Ortep3 for Windows (Farrugia,1997)'
_computing_publication_material   'Wingx 1.80.05 (Farrugia, 1999)' 
 
_refine_special_details 
; 
 Refinement of F^2^ against ALL reflections.  The weighted R-factor wR and 
 goodness of fit S are based on F^2^, conventional R-factors R are based 
 on F, with F set to zero for negative F^2^. The threshold expression of 
 F^2^ > 2sigma(F^2^) is used only for calculating R-factors(gt) etc. and is 
 not relevant to the choice of reflections for refinement.  R-factors based 
 on F^2^ are statistically about twice as large as those based on F, and R- 
 factors based on ALL data will be even larger. 
; 
 
_refine_ls_structure_factor_coef  Fsqd  
_refine_ls_matrix_type            full 
_refine_ls_weighting_scheme       calc  
_refine_ls_weighting_details 
 'calc w=1/[\s^2^(Fo^2^)+(0.0647P)^2^+0.2706P] where P=(Fo^2^+2Fc^2^)/3' 
_atom_sites_solution_primary      direct 
_atom_sites_solution_secondary    difmap 
_atom_sites_solution_hydrogens    geom 
_refine_ls_hydrogen_treatment     mixed 
_refine_ls_extinction_method      none 
_refine_ls_extinction_coef        ? 
_refine_ls_number_reflns          7253 
_refine_ls_number_parameters      218 
_refine_ls_number_restraints      5 
_refine_ls_R_factor_all           0.0679 
_refine_ls_R_factor_gt            0.0445 
_refine_ls_wR_factor_ref          0.1246 
_refine_ls_wR_factor_gt           0.1126 
_refine_ls_goodness_of_fit_ref    1.015 
_refine_ls_restrained_S_all       1.015 
_refine_ls_shift/su_max           0.001 
_refine_ls_shift/su_mean          0.000 
 
loop_ 
 _atom_site_label 
 _atom_site_type_symbol 
 _atom_site_fract_x 
 _atom_site_fract_y 
 _atom_site_fract_z 
 _atom_site_U_iso_or_equiv 
 _atom_site_adp_type 
 _atom_site_occupancy 
 _atom_site_symmetry_multiplicity 
 _atom_site_calc_flag 
 _atom_site_refinement_flags 
 _atom_site_disorder_assembly 
 _atom_site_disorder_group 
Cu Cu 0.70168(2) 0.369399(13) 0.804889(13) 0.02946(6) Uani 1 1 d . . . 
Cl1 Cl 0.74354(12) 0.2500 1.33071(5) 0.0607(2) Uani 1 2 d S . . 
O1 O 0.67861(19) 0.2500 0.89678(10) 0.0280(3) Uani 1 2 d S . . 
O2 O 0.6972(2) 0.2500 0.71603(11) 0.0333(3) Uani 1 2 d S . . 
H2 H 0.610(4) 0.2500 0.670(3) 0.050 Uiso 1 2 d S . . 
N1 N 0.71857(17) 0.47420(10) 0.91209(10) 0.0334(2) Uani 1 1 d . . . 
N3 N 0.73367(16) 0.49736(12) 0.71794(10) 0.0352(3) Uani 1 1 d . . . 
C1 C 0.7003(2) 0.2500 0.99420(14) 0.0257(3) Uani 1 2 d S . . 
C2 C 0.71096(17) 0.34910(12) 1.04852(10) 0.0292(2) Uani 1 1 d . . . 
C3 C 0.72298(19) 0.34680(14) 1.15220(11) 0.0348(3) Uani 1 1 d . . . 
H3 H 0.7277 0.4116 1.1874 0.042 Uiso 1 1 calc R . . 
C4 C 0.7278(3) 0.2500 1.20245(15) 0.0370(4) Uani 1 2 d S . . 
C5 C 0.7174(2) 0.45543(12) 1.00390(12) 0.0344(3) Uani 1 1 d . . . 
H5 H 0.7211 0.5152 1.0457 0.041 Uiso 1 1 calc R . . 
C6 C 0.7358(3) 0.58570(14) 0.87846(15) 0.0505(5) Uani 1 1 d . . . 
H6A H 0.8537 0.6071 0.8934 0.061 Uiso 1 1 calc R . . 
H6B H 0.6738 0.6352 0.9123 0.061 Uiso 1 1 calc R . . 
C7 C 0.6649(3) 0.58897(14) 0.76639(16) 0.0482(4) Uani 1 1 d . . . 
H7A H 0.5427 0.5842 0.7529 0.058 Uiso 1 1 calc R . . 
H7B H 0.6952 0.6570 0.7393 0.058 Uiso 1 1 calc R . . 
C8 C 0.9132(2) 0.5125(2) 0.71249(18) 0.0581(6) Uani 1 1 d . . . 
H8A H 0.9883 0.4941 0.7755 0.070 Uiso 1 1 calc R . . 
H8B H 0.9345 0.5868 0.6955 0.070 Uiso 1 1 calc R . . 
C9 C 0.9360(3) 0.4363(3) 0.6315(2) 0.0835(9) Uani 1 1 d . . . 
H9A H 0.9647 0.3642 0.6583 0.100 Uiso 1 1 calc R . . 
H9B H 1.0248 0.4615 0.5998 0.100 Uiso 1 1 calc R . . 
C10 C 0.7679(4) 0.4354(3) 0.55789(18) 0.0712(7) Uani 1 1 d . . . 
H10A H 0.7332 0.3616 0.5392 0.085 Uiso 1 1 calc R . . 
H10B H 0.7749 0.4754 0.4980 0.085 Uiso 1 1 calc R . . 
C11 C 0.6437(2) 0.48893(18) 0.61093(13) 0.0458(4) Uani 1 1 d . . . 
H11A H 0.6124 0.5602 0.5832 0.055 Uiso 1 1 calc R . . 
H11B H 0.5424 0.4453 0.6045 0.055 Uiso 1 1 calc R . . 
O1W O 0.38247(19) 0.39631(13) 0.76650(13) 0.0499(3) Uani 1 1 d D . . 
H1W H 0.350(4) 0.366(2) 0.7135(16) 0.061(9) Uiso 1 1 d D . . 
H2W H 0.359(4) 0.359(2) 0.810(2) 0.074(10) Uiso 1 1 d D . . 
N2 N 0.1152(2) 0.2500 0.89602(15) 0.0381(4) Uani 1 2 d S . . 
O3 O 0.0388(2) 0.33708(14) 0.89257(16) 0.0654(5) Uani 1 1 d . . . 
O4 O 0.2737(2) 0.2500 0.90507(17) 0.0546(5) Uani 1 2 d S . . 
N4 N 0.2845(4) 0.2500 0.5236(2) 0.0546(6) Uani 1 2 d S . . 
O5 O 0.2532(10) 0.2500 0.6062(5) 0.093(2) Uani 0.50 2 d SPD . . 
O6 O 0.4453(7) 0.2500 0.5243(5) 0.0799(16) Uani 0.50 2 d SPD . . 
O6A O 0.3066(19) 0.3224(7) 0.5753(5) 0.244(7) Uani 0.50 1 d P . . 
O7 O 0.1854(13) 0.2500 0.4476(8) 0.118(6) Uani 0.50 2 d SPD . . 
O7A O 0.2295(18) 0.2500 0.4343(7) 0.095(4) Uani 0.50 2 d SP . . 
 
loop_ 
 _atom_site_aniso_label 
 _atom_site_aniso_U_11 
 _atom_site_aniso_U_22 
 _atom_site_aniso_U_33 
 _atom_site_aniso_U_23 
 _atom_site_aniso_U_13 
 _atom_site_aniso_U_12 
Cu 0.03991(11) 0.02374(9) 0.02566(9) 0.00176(6) 0.00918(6) -0.00203(6) 
Cl1 0.0847(5) 0.0747(5) 0.0221(2) 0.000 0.0102(3) 0.000 
O1 0.0405(7) 0.0229(6) 0.0214(6) 0.000 0.0083(5) 0.000 
O2 0.0444(8) 0.0322(7) 0.0239(6) 0.000 0.0089(5) 0.000 
N1 0.0433(6) 0.0236(5) 0.0332(6) -0.0014(5) 0.0079(5) -0.0031(4) 
N3 0.0371(6) 0.0350(6) 0.0328(6) 0.0091(5) 0.0063(5) -0.0038(5) 
C1 0.0263(7) 0.0280(8) 0.0230(7) 0.000 0.0061(5) 0.000 
C2 0.0313(6) 0.0304(6) 0.0258(6) -0.0038(5) 0.0063(4) -0.0019(5) 
C3 0.0380(7) 0.0406(7) 0.0256(6) -0.0074(6) 0.0067(5) -0.0033(6) 
C4 0.0382(10) 0.0514(13) 0.0215(8) 0.000 0.0065(7) 0.000 
C5 0.0415(7) 0.0287(6) 0.0331(7) -0.0065(6) 0.0082(5) -0.0036(5) 
C6 0.0801(13) 0.0248(7) 0.0456(10) 0.0003(7) 0.0115(9) -0.0097(7) 
C7 0.0655(11) 0.0285(7) 0.0486(10) 0.0106(7) 0.0083(8) 0.0008(7) 
C8 0.0359(8) 0.0723(14) 0.0647(12) 0.0266(11) 0.0077(8) -0.0102(9) 
C9 0.0606(14) 0.118(3) 0.0833(19) 0.0232(18) 0.0411(13) 0.0142(15) 
C10 0.0881(17) 0.090(2) 0.0430(11) 0.0038(12) 0.0304(11) -0.0032(15) 
C11 0.0501(9) 0.0527(10) 0.0322(7) 0.0131(7) 0.0038(6) -0.0031(8) 
O1W 0.0493(7) 0.0450(7) 0.0555(9) 0.0003(7) 0.0113(6) -0.0081(6) 
N2 0.0357(8) 0.0401(10) 0.0369(9) 0.000 0.0047(7) 0.000 
O3 0.0471(7) 0.0404(7) 0.1036(14) -0.0041(9) 0.0054(8) 0.0041(6) 
O4 0.0347(8) 0.0711(14) 0.0603(12) 0.000 0.0155(8) 0.000 
N4 0.0647(15) 0.0424(12) 0.0487(13) 0.000 -0.0051(11) 0.000 
O5 0.146(6) 0.079(4) 0.057(3) 0.000 0.032(4) 0.000 
O6 0.060(3) 0.088(4) 0.083(4) 0.000 -0.002(2) 0.000 
O6A 0.53(2) 0.127(6) 0.066(4) -0.033(4) 0.047(7) -0.140(10) 
O7 0.088(5) 0.128(9) 0.099(9) 0.000 -0.064(6) 0.000 
O7A 0.182(11) 0.059(4) 0.037(3) 0.000 0.006(5) 0.000 
 
_geom_special_details 
; 
 All esds (except the esd in the dihedral angle between two l.s. planes) 
 are estimated using the full covariance matrix.  The cell esds are taken 
 into account individually in the estimation of esds in distances, angles 
 and torsion angles; correlations between esds in cell parameters are only 
 used when they are defined by crystal symmetry.  An approximate (isotropic) 
 treatment of cell esds is used for estimating esds involving l.s. planes. 
; 
 
loop_ 
 _geom_bond_atom_site_label_1 
 _geom_bond_atom_site_label_2 
 _geom_bond_distance 
 _geom_bond_site_symmetry_2 
 _geom_bond_publ_flag 
Cu O2 1.9063(10) . ? 
Cu N1 1.9393(13) . ? 
Cu O1 1.9726(9) . ? 
Cu N3 2.0278(13) . ? 
Cu Cu 2.9450(4) 4_565 ? 
Cl1 C4 1.735(2) . ? 
O1 C1 1.309(2) . ? 
O1 Cu 1.9727(9) 4_565 ? 
O2 Cu 1.9062(10) 4_565 ? 
O2 H2 0.84(4) . ? 
N1 C5 1.281(2) . ? 
N1 C6 1.466(2) . ? 
N3 C7 1.479(3) . ? 
N3 C8 1.486(2) . ? 
N3 C11 1.493(2) . ? 
C1 C2 1.4238(17) . ? 
C1 C2 1.4238(17) 4_565 ? 
C2 C3 1.403(2) . ? 
C2 C5 1.453(2) . ? 
C3 C4 1.375(2) . ? 
C3 H3 0.9300 . ? 
C4 C3 1.375(2) 4_565 ? 
C5 H5 0.9300 . ? 
C6 C7 1.519(3) . ? 
C6 H6A 0.9700 . ? 
C6 H6B 0.9700 . ? 
C7 H7A 0.9700 . ? 
C7 H7B 0.9700 . ? 
C8 C9 1.496(4) . ? 
C8 H8A 0.9700 . ? 
C8 H8B 0.9700 . ? 
C9 C10 1.511(4) . ? 
C9 H9A 0.9700 . ? 
C9 H9B 0.9700 . ? 
C10 C11 1.515(3) . ? 
C10 H10A 0.9700 . ? 
C10 H10B 0.9700 . ? 
C11 H11A 0.9700 . ? 
C11 H11B 0.9700 . ? 
O1W H1W 0.810(17) . ? 
O1W H2W 0.799(18) . ? 
N2 O3 1.2357(18) 4_565 ? 
N2 O3 1.2357(18) . ? 
N2 O4 1.265(3) . ? 
N4 O6A 1.130(7) 4_565 ? 
N4 O6A 1.130(7) . ? 
N4 O7 1.169(8) . ? 
N4 O7A 1.208(9) . ? 
N4 O5 1.214(7) . ? 
N4 O6 1.302(6) . ? 
O5 O6A 1.115(8) 4_565 ? 
O5 O6A 1.115(9) . ? 
O6 O6A 1.701(14) 4_565 ? 
O6 O6A 1.701(14) . ? 
O6A O6A 1.786(18) 4_565 ? 
 
loop_ 
 _geom_angle_atom_site_label_1 
 _geom_angle_atom_site_label_2 
 _geom_angle_atom_site_label_3 
 _geom_angle 
 _geom_angle_site_symmetry_1 
 _geom_angle_site_symmetry_3 
 _geom_angle_publ_flag 
O2 Cu N1 170.87(5) . . ? 
O2 Cu O1 80.79(5) . . ? 
N1 Cu O1 90.84(5) . . ? 
O2 Cu N3 102.28(6) . . ? 
N1 Cu N3 85.96(6) . . ? 
O1 Cu N3 176.40(5) . . ? 
O2 Cu Cu 39.43(4) . 4_565 ? 
N1 Cu Cu 131.80(4) . 4_565 ? 
O1 Cu Cu 41.72(3) . 4_565 ? 
N3 Cu Cu 141.10(4) . 4_565 ? 
C1 O1 Cu 129.88(4) . . ? 
C1 O1 Cu 129.88(4) . 4_565 ? 
Cu O1 Cu 96.57(6) . 4_565 ? 
Cu O2 Cu 101.15(7) 4_565 . ? 
Cu O2 H2 112.2(13) 4_565 . ? 
Cu O2 H2 112.2(13) . . ? 
C5 N1 C6 119.96(14) . . ? 
C5 N1 Cu 127.53(11) . . ? 
C6 N1 Cu 112.50(11) . . ? 
C7 N3 C8 113.26(16) . . ? 
C7 N3 C11 110.04(14) . . ? 
C8 N3 C11 103.59(14) . . ? 
C7 N3 Cu 102.82(10) . . ? 
C8 N3 Cu 112.28(11) . . ? 
C11 N3 Cu 115.18(11) . . ? 
O1 C1 C2 120.87(9) . . ? 
O1 C1 C2 120.87(9) . 4_565 ? 
C2 C1 C2 118.26(18) . 4_565 ? 
C3 C2 C1 119.67(14) . . ? 
C3 C2 C5 116.33(14) . . ? 
C1 C2 C5 123.95(14) . . ? 
C4 C3 C2 120.87(15) . . ? 
C4 C3 H3 119.6 . . ? 
C2 C3 H3 119.6 . . ? 
C3 C4 C3 120.6(2) 4_565 . ? 
C3 C4 Cl1 119.71(10) 4_565 . ? 
C3 C4 Cl1 119.71(10) . . ? 
N1 C5 C2 125.81(14) . . ? 
N1 C5 H5 117.1 . . ? 
C2 C5 H5 117.1 . . ? 
N1 C6 C7 107.56(14) . . ? 
N1 C6 H6A 110.2 . . ? 
C7 C6 H6A 110.2 . . ? 
N1 C6 H6B 110.2 . . ? 
C7 C6 H6B 110.2 . . ? 
H6A C6 H6B 108.5 . . ? 
N3 C7 C6 109.68(15) . . ? 
N3 C7 H7A 109.7 . . ? 
C6 C7 H7A 109.7 . . ? 
N3 C7 H7B 109.7 . . ? 
C6 C7 H7B 109.7 . . ? 
H7A C7 H7B 108.2 . . ? 
N3 C8 C9 103.74(19) . . ? 
N3 C8 H8A 111.0 . . ? 
C9 C8 H8A 111.0 . . ? 
N3 C8 H8B 111.0 . . ? 
C9 C8 H8B 111.0 . . ? 
H8A C8 H8B 109.0 . . ? 
C8 C9 C10 105.2(2) . . ? 
C8 C9 H9A 110.7 . . ? 
C10 C9 H9A 110.7 . . ? 
C8 C9 H9B 110.7 . . ? 
C10 C9 H9B 110.7 . . ? 
H9A C9 H9B 108.8 . . ? 
C9 C10 C11 105.9(2) . . ? 
C9 C10 H10A 110.6 . . ? 
C11 C10 H10A 110.6 . . ? 
C9 C10 H10B 110.6 . . ? 
C11 C10 H10B 110.6 . . ? 
H10A C10 H10B 108.7 . . ? 
N3 C11 C10 105.52(17) . . ? 
N3 C11 H11A 110.6 . . ? 
C10 C11 H11A 110.6 . . ? 
N3 C11 H11B 110.6 . . ? 
C10 C11 H11B 110.6 . . ? 
H11A C11 H11B 108.8 . . ? 
H1W O1W H2W 108(3) . . ? 
O3 N2 O3 120.7(2) 4_565 . ? 
O3 N2 O4 119.64(11) 4_565 . ? 
O3 N2 O4 119.64(11) . . ? 
O6A N4 O6A 104.4(9) 4_565 . ? 
O6A N4 O7A 127.5(5) 4_565 . ? 
O6A N4 O7A 127.5(5) . . ? 
O7 N4 O5 126.0(8) . . ? 
O7 N4 O6 120.1(7) . . ? 
O5 N4 O6 113.8(5) . . ? 
 
loop_ 
 _geom_torsion_atom_site_label_1 
 _geom_torsion_atom_site_label_2 
 _geom_torsion_atom_site_label_3 
 _geom_torsion_atom_site_label_4 
 _geom_torsion 
 _geom_torsion_site_symmetry_1 
 _geom_torsion_site_symmetry_2 
 _geom_torsion_site_symmetry_3 
 _geom_torsion_site_symmetry_4 
 _geom_torsion_publ_flag 
O2 Cu O1 C1 165.77(17) . . . . ? 
N1 Cu O1 C1 -10.55(16) . . . . ? 
Cu Cu O1 C1 159.57(19) 4_565 . . . ? 
O2 Cu O1 Cu 6.20(7) . . . 4_565 ? 
N1 Cu O1 Cu -170.12(6) . . . 4_565 ? 
O1 Cu O2 Cu -6.49(7) . . . 4_565 ? 
N3 Cu O2 Cu 171.60(6) . . . 4_565 ? 
O1 Cu N1 C5 1.72(15) . . . . ? 
N3 Cu N1 C5 -176.62(15) . . . . ? 
Cu Cu N1 C5 -7.09(17) 4_565 . . . ? 
O1 Cu N1 C6 -178.87(13) . . . . ? 
N3 Cu N1 C6 2.79(13) . . . . ? 
Cu Cu N1 C6 172.32(11) 4_565 . . . ? 
O2 Cu N3 C7 156.35(11) . . . . ? 
N1 Cu N3 C7 -27.62(11) . . . . ? 
Cu Cu N3 C7 164.84(9) 4_565 . . . ? 
O2 Cu N3 C8 -81.59(15) . . . . ? 
N1 Cu N3 C8 94.44(14) . . . . ? 
Cu Cu N3 C8 -73.09(15) 4_565 . . . ? 
O2 Cu N3 C11 36.66(14) . . . . ? 
N1 Cu N3 C11 -147.31(13) . . . . ? 
Cu Cu N3 C11 45.15(15) 4_565 . . . ? 
Cu O1 C1 C2 14.0(3) . . . . ? 
Cu O1 C1 C2 167.11(12) 4_565 . . . ? 
Cu O1 C1 C2 -167.11(12) . . . 4_565 ? 
Cu O1 C1 C2 -14.0(3) 4_565 . . 4_565 ? 
O1 C1 C2 C3 175.79(15) . . . . ? 
C2 C1 C2 C3 -3.2(3) 4_565 . . . ? 
O1 C1 C2 C5 -6.9(3) . . . . ? 
C2 C1 C2 C5 174.14(10) 4_565 . . . ? 
C1 C2 C3 C4 1.2(2) . . . . ? 
C5 C2 C3 C4 -176.27(16) . . . . ? 
C2 C3 C4 C3 0.8(3) . . . 4_565 ? 
C2 C3 C4 Cl1 179.75(13) . . . . ? 
C6 N1 C5 C2 -176.29(16) . . . . ? 
Cu N1 C5 C2 3.1(2) . . . . ? 
C3 C2 C5 N1 175.62(15) . . . . ? 
C1 C2 C5 N1 -1.8(3) . . . . ? 
C5 N1 C6 C7 -157.89(17) . . . . ? 
Cu N1 C6 C7 22.6(2) . . . . ? 
C8 N3 C7 C6 -73.96(19) . . . . ? 
C11 N3 C7 C6 170.63(16) . . . . ? 
Cu N3 C7 C6 47.44(17) . . . . ? 
N1 C6 C7 N3 -47.6(2) . . . . ? 
C7 N3 C8 C9 -159.92(19) . . . . ? 
C11 N3 C8 C9 -40.7(2) . . . . ? 
Cu N3 C8 C9 84.16(19) . . . . ? 
N3 C8 C9 C10 33.5(3) . . . . ? 
C8 C9 C10 C11 -13.4(3) . . . . ? 
C7 N3 C11 C10 153.61(18) . . . . ? 
C8 N3 C11 C10 32.2(2) . . . . ? 
Cu N3 C11 C10 -90.77(18) . . . . ? 
C9 C10 C11 N3 -11.5(3) . . . . ? 
 
_diffrn_measured_fraction_theta_max    0.951 
_diffrn_reflns_theta_full              38.18 
_diffrn_measured_fraction_theta_full   0.951 
_refine_diff_density_max    0.685 
_refine_diff_density_min   -0.964 
_refine_diff_density_rms    0.127 

#===END

 
data_9new 
 
_audit_creation_method            SHELXL-97 
_chemical_name_systematic 
; 
 ? 
; 
_chemical_name_common             ? 
_chemical_melting_point           ? 
_chemical_formula_moiety          
 ' C48 H80 Cu4 N9 O9, 3(N O3)'   
_chemical_formula_sum 
 'C48 H80 Cu4 N12 O18' 
_chemical_formula_weight          1367.40
 
loop_ 
 _atom_type_symbol 
 _atom_type_description 
 _atom_type_scat_dispersion_real 
 _atom_type_scat_dispersion_imag 
 _atom_type_scat_source 
 'C'  'C'   0.0033   0.0016 
 'International Tables Vol C Tables 4.2.6.8 and 6.1.1.4' 
 'H'  'H'   0.0000   0.0000 
 'International Tables Vol C Tables 4.2.6.8 and 6.1.1.4' 
 'N'  'N'   0.0061   0.0033 
 'International Tables Vol C Tables 4.2.6.8 and 6.1.1.4' 
 'O'  'O'   0.0106   0.0060 
 'International Tables Vol C Tables 4.2.6.8 and 6.1.1.4' 
 'Cu'  'Cu'   0.3201   1.2651 
 'International Tables Vol C Tables 4.2.6.8 and 6.1.1.4' 
 
_symmetry_cell_setting            'tetragonal' 
_symmetry_space_group_name_H-M    'P 42/n' 
 
loop_ 
 _symmetry_equiv_pos_as_xyz 
 'x, y, z' 
 '-x+1/2, -y+1/2, z' 
 '-y, x+1/2, z+1/2' 
 'y+1/2, -x, z+1/2' 
 '-x, -y, -z' 
 'x-1/2, y-1/2, -z' 
 'y, -x-1/2, -z-1/2' 
 '-y-1/2, x, -z-1/2' 
 
_cell_length_a                    24.820(3) 
_cell_length_b                    24.820(3) 
_cell_length_c                    10.501(2) 
_cell_angle_alpha                 90.00 
_cell_angle_beta                  90.00 
_cell_angle_gamma                 90.00 
_cell_volume                      6469.0(18) 
_cell_formula_units_Z             4 
_cell_measurement_temperature     293(2) 
_cell_measurement_reflns_used     ? 
_cell_measurement_theta_min       ? 
_cell_measurement_theta_max       ? 
 
_exptl_crystal_description        'prism' 
_exptl_crystal_colour             'green' 
_exptl_crystal_size_max           0.40
_exptl_crystal_size_mid           0.26
_exptl_crystal_size_min           0.20 
_exptl_crystal_density_meas       ? 
_exptl_crystal_density_diffrn     1.404 
_exptl_crystal_density_method     'not measured' 
_exptl_crystal_F_000              2848 
_exptl_absorpt_coefficient_mu     1.369 
_exptl_absorpt_correction_type    'MULTI-SCAN'
_exptl_absorpt_correction_T_min      0.6017
_exptl_absorpt_correction_T_max      0.7785
_exptl_absorpt_process_details    'BRUKER SADABS' 
 
_exptl_special_details 
; 
 ? 
; 
 
_diffrn_ambient_temperature       293(2) 
_diffrn_radiation_wavelength      0.71073 
_diffrn_radiation_type            MoK\a 
_diffrn_radiation_source          'fine-focus sealed tube' 
_diffrn_radiation_monochromator   graphite 
_diffrn_measurement_device_type   'BRUKER SMART APEX CCD DIFFRACTOMETER' 
_diffrn_measurement_method        'OMEGA-PHI SCAN'  
_diffrn_detector_area_resol_mean  ? 
_diffrn_standards_number          ? 
_diffrn_standards_interval_count  ? 
_diffrn_standards_interval_time   ? 
_diffrn_standards_decay_%         ? 
_diffrn_reflns_number             24566 
_diffrn_reflns_av_R_equivalents   0.0667 
_diffrn_reflns_av_sigmaI/netI     0.0536 
_diffrn_reflns_limit_h_min        -27 
_diffrn_reflns_limit_h_max        25 
_diffrn_reflns_limit_k_min        -27 
_diffrn_reflns_limit_k_max        27 
_diffrn_reflns_limit_l_min        -11 
_diffrn_reflns_limit_l_max        11 
_diffrn_reflns_theta_min          1.16 
_diffrn_reflns_theta_max          23.08 
_reflns_number_total              4543 
_reflns_number_gt                 2455 
_reflns_threshold_expression      >2sigma(I) 
 
_computing_data_collection        'BRUKER SMART' 
_computing_cell_refinement        'BRUKER SMART' 
_computing_data_reduction         'BRUKER SAINT' 
_computing_structure_solution     'SHELX97 (Sheldrick, 2008)'
_computing_structure_refinement   'SHELX97 (Sheldrick, 2008)'
_computing_molecular_graphics     'Ortep3 for Windows (Farrugia,1997)'
_computing_publication_material   'Wingx 1.80.05 (Farrugia, 1999)'
 
_refine_special_details 
; 
 Refinement of F^2^ against ALL reflections.  The weighted R-factor wR and 
 goodness of fit S are based on F^2^, conventional R-factors R are based 
 on F, with F set to zero for negative F^2^. The threshold expression of 
 F^2^ > 2sigma(F^2^) is used only for calculating R-factors(gt) etc. and is 
 not relevant to the choice of reflections for refinement.  R-factors based 
 on F^2^ are statistically about twice as large as those based on F, and R- 
 factors based on ALL data will be even larger. 
; 
 
_refine_ls_structure_factor_coef  Fsqd  
_refine_ls_matrix_type            full 
_refine_ls_weighting_scheme       calc  
_refine_ls_weighting_details 
 'calc w=1/[\s^2^(Fo^2^)+(0.1809P)^2^+10.3255P] where P=(Fo^2^+2Fc^2^)/3' 
_atom_sites_solution_primary      direct 
_atom_sites_solution_secondary    difmap 
_atom_sites_solution_hydrogens    geom 
_refine_ls_hydrogen_treatment     mixed 
_refine_ls_extinction_method      none 
_refine_ls_extinction_coef        ? 
_refine_ls_number_reflns          4543 
_refine_ls_number_parameters      427 
_refine_ls_number_restraints      30 
_refine_ls_R_factor_all           0.0857 
_refine_ls_R_factor_gt            0.0703 
_refine_ls_wR_factor_ref          0.2372 
_refine_ls_wR_factor_gt           0.2241 
_refine_ls_goodness_of_fit_ref    1.167 
_refine_ls_restrained_S_all       1.206 
_refine_ls_shift/su_max           0.000 
_refine_ls_shift/su_mean          0.000 
 
loop_ 
 _atom_site_label 
 _atom_site_type_symbol 
 _atom_site_fract_x 
 _atom_site_fract_y 
 _atom_site_fract_z 
 _atom_site_U_iso_or_equiv 
 _atom_site_adp_type 
 _atom_site_occupancy 
 _atom_site_symmetry_multiplicity 
 _atom_site_calc_flag 
 _atom_site_refinement_flags 
 _atom_site_disorder_assembly 
 _atom_site_disorder_group 
Cu1 Cu 0.56379(7) 0.60280(6) 0.31089(18) 0.0896(10) Uani 1 1 d . . . 
Cu2 Cu 0.47425(6) 0.53614(6) 0.21900(16) 0.0768(9) Uani 1 1 d . . . 
O1 O 0.5532(4) 0.5304(4) 0.2367(8) 0.079(3) Uani 1 1 d . . . 
O2 O 0.4905(4) 0.6104(4) 0.2516(9) 0.099(3) Uani 1 1 d D . . 
H22 H 0.480(7) 0.637(5) 0.206(14) 0.149 Uiso 1 1 d D . . 
O1W O 0.5995(5) 0.6442(5) 0.1232(14) 0.176(5) Uani 1 1 d . . . 
H1W H 0.6310 0.6537 0.1383 0.263 Uiso 1 1 d R . . 
H2W H 0.5823 0.6642 0.0805 0.263 Uiso 1 1 d R . . 
C1 C 0.5830(6) 0.4859(6) 0.2529(12) 0.065(3) Uani 1 1 d . . . 
C2 C 0.6351(6) 0.4880(6) 0.3033(12) 0.070(4) Uani 1 1 d . . . 
C3 C 0.6663(6) 0.4417(7) 0.3103(12) 0.081(4) Uani 1 1 d . . . 
H3 H 0.7009 0.4441 0.3438 0.097 Uiso 1 1 calc R B . 
C4 C 0.6472(7) 0.3907(6) 0.2681(14) 0.080(4) Uani 1 1 d . A . 
C5 C 0.5956(7) 0.3910(6) 0.2244(12) 0.077(4) Uani 1 1 d . . . 
H5 H 0.5810 0.3582 0.1987 0.092 Uiso 1 1 calc R B . 
C6 C 0.5636(6) 0.4351(7) 0.2153(11) 0.066(4) Uani 1 1 d . . . 
C7 C 0.6835(7) 0.3398(6) 0.2769(17) 0.101(5) Uani 1 1 d . . . 
C71 C 0.7420(12) 0.3531(12) 0.331(6) 0.21(3) Uani 0.64(3) 1 d P A 1 
H71A H 0.7625 0.3204 0.3386 0.309 Uiso 0.64(3) 1 calc PR A 1 
H71B H 0.7387 0.3696 0.4139 0.309 Uiso 0.64(3) 1 calc PR A 1 
H71C H 0.7601 0.3775 0.2747 0.309 Uiso 0.64(3) 1 calc PR A 1 
C72 C 0.6563(12) 0.3023(10) 0.369(3) 0.142(14) Uani 0.64(3) 1 d P A 1 
H72A H 0.6195 0.2972 0.3446 0.213 Uiso 0.64(3) 1 calc PR A 1 
H72B H 0.6576 0.3176 0.4533 0.213 Uiso 0.64(3) 1 calc PR A 1 
H72C H 0.6746 0.2682 0.3693 0.213 Uiso 0.64(3) 1 calc PR A 1 
C73 C 0.6861(16) 0.3139(14) 0.155(3) 0.153(14) Uani 0.64(3) 1 d P A 1 
H73A H 0.6507 0.3025 0.1302 0.230 Uiso 0.64(3) 1 calc PR A 1 
H73B H 0.7094 0.2831 0.1603 0.230 Uiso 0.64(3) 1 calc PR A 1 
H73C H 0.7000 0.3387 0.0930 0.230 Uiso 0.64(3) 1 calc PR A 1 
C71A C 0.715(2) 0.335(2) 0.394(5) 0.11(2) Uiso 0.36(3) 1 d P A 2 
H71D H 0.7352 0.3021 0.3925 0.171 Uiso 0.36(3) 1 calc PR A 2 
H71E H 0.6915 0.3354 0.4662 0.171 Uiso 0.36(3) 1 calc PR A 2 
H71F H 0.7397 0.3650 0.3997 0.171 Uiso 0.36(3) 1 calc PR A 2 
C72A C 0.650(2) 0.289(2) 0.221(6) 0.13(2) Uiso 0.36(3) 1 d P A 2 
H72D H 0.6712 0.2575 0.2259 0.195 Uiso 0.36(3) 1 calc PR A 2 
H72E H 0.6400 0.2964 0.1345 0.195 Uiso 0.36(3) 1 calc PR A 2 
H72F H 0.6175 0.2846 0.2711 0.195 Uiso 0.36(3) 1 calc PR A 2 
C73A C 0.730(2) 0.3456(19) 0.176(5) 0.107(18) Uiso 0.36(3) 1 d P A 2 
H73D H 0.7540 0.3155 0.1832 0.160 Uiso 0.36(3) 1 calc PR A 2 
H73E H 0.7494 0.3784 0.1917 0.160 Uiso 0.36(3) 1 calc PR A 2 
H73F H 0.7148 0.3465 0.0921 0.160 Uiso 0.36(3) 1 calc PR A 2 
C15 C 0.6575(6) 0.5355(7) 0.3596(15) 0.097(5) Uani 1 1 d . . . 
H15 H 0.6919 0.5323 0.3939 0.116 Uiso 1 1 calc R B . 
N1 N 0.6350(4) 0.5829(5) 0.3683(12) 0.094(4) Uani 1 1 d D B . 
C16 C 0.6618(6) 0.6275(6) 0.441(2) 0.145(7) Uani 1 1 d D . . 
H16A H 0.6593 0.6204 0.5316 0.174 Uiso 0.63(3) 1 calc PR B 1 
H16B H 0.6997 0.6292 0.4184 0.174 Uiso 0.63(3) 1 calc PR B 1 
H16C H 0.6756 0.6552 0.3845 0.174 Uiso 0.37(3) 1 calc PR B 2 
H16D H 0.6909 0.6141 0.4938 0.174 Uiso 0.37(3) 1 calc PR B 2 
C17 C 0.6356(8) 0.6802(8) 0.411(2) 0.124(12) Uani 0.63(3) 1 d PD B 1 
H17A H 0.6449 0.6931 0.3270 0.149 Uiso 0.63(3) 1 d PR B 1 
H17B H 0.6463 0.7071 0.4734 0.149 Uiso 0.63(3) 1 d PRD B 1 
C17A C 0.6152(10) 0.6482(11) 0.521(2) 0.13(2) Uani 0.37(3) 1 d PD B 2 
H17C H 0.6273 0.6778 0.5739 0.151 Uiso 0.37(3) 1 d PRD B 2 
H17D H 0.6000 0.6205 0.5754 0.151 Uiso 0.37(3) 1 d PR B 2 
N3 N 0.5742(5) 0.6700(4) 0.4206(14) 0.114(4) Uani 1 1 d D B 1 
C18 C 0.5550(7) 0.7222(7) 0.3731(19) 0.150(7) Uani 1 1 d D B 1 
H18A H 0.5539 0.7230 0.2808 0.179 Uiso 1 1 calc R B 1 
H18B H 0.5771 0.7517 0.4038 0.179 Uiso 1 1 calc R B 1 
C19 C 0.5007(9) 0.7238(9) 0.428(3) 0.214(10) Uani 1 1 d D B 1 
H19A H 0.4938 0.7592 0.4642 0.256 Uiso 1 1 calc R B 1 
H19B H 0.4741 0.7170 0.3628 0.256 Uiso 1 1 calc R B 1 
C20 C 0.4966(8) 0.6832(10) 0.527(2) 0.188(9) Uani 1 1 d D B 1 
H20A H 0.4822 0.6985 0.6053 0.226 Uiso 1 1 calc R B 1 
H20B H 0.4736 0.6537 0.5005 0.226 Uiso 1 1 calc R B 1 
C21 C 0.5507(9) 0.6652(9) 0.545(2) 0.184(9) Uani 1 1 d D B 1 
H21A H 0.5516 0.6282 0.5748 0.221 Uiso 1 1 calc R B 1 
H21B H 0.5695 0.6878 0.6063 0.221 Uiso 1 1 calc R B 1 
C8 C 0.5090(8) 0.4265(6) 0.1725(13) 0.087(4) Uani 1 1 d . . . 
H8 H 0.5001 0.3916 0.1478 0.104 Uiso 1 1 calc R B . 
N2 N 0.4714(5) 0.4617(5) 0.1648(11) 0.084(3) Uani 1 1 d D B . 
C9 C 0.4167(6) 0.4443(7) 0.1282(16) 0.118(6) Uani 1 1 d D . . 
H9A H 0.3985 0.4281 0.2004 0.142 Uiso 0.64(3) 1 calc PR B 1 
H9B H 0.4185 0.4179 0.0603 0.142 Uiso 0.64(3) 1 calc PR B 1 
H9C H 0.4101 0.4513 0.0386 0.142 Uiso 0.36(3) 1 calc PR B 2 
H9D H 0.4118 0.4061 0.1442 0.142 Uiso 0.36(3) 1 calc PR B 2 
C10 C 0.3865(10) 0.4934(9) 0.084(2) 0.131(13) Uani 0.64(3) 1 d PD B 1 
H10A H 0.3485 0.4852 0.0733 0.157 Uiso 0.64(3) 1 calc PR B 1 
H10B H 0.4007 0.5059 0.0031 0.157 Uiso 0.64(3) 1 calc PR B 1 
C10A C 0.3800(11) 0.4766(8) 0.209(2) 0.102(19) Uani 0.36(3) 1 d PD B 2 
H10C H 0.3895 0.4691 0.2964 0.122 Uiso 0.36(3) 1 d PRD B 2 
H10D H 0.3423 0.4676 0.1959 0.122 Uiso 0.36(3) 1 d PR B 2 
N4 N 0.3944(5) 0.5368(5) 0.1887(12) 0.104(4) Uani 1 1 d D B 1 
C11 C 0.3719(9) 0.5830(8) 0.1165(17) 0.166(7) Uani 1 1 d D B 1 
H11A H 0.3989 0.6004 0.0641 0.199 Uiso 1 1 calc R B 1 
H11B H 0.3415 0.5723 0.0639 0.199 Uiso 1 1 calc R B 1 
C12 C 0.3551(10) 0.6170(9) 0.223(2) 0.189(9) Uani 1 1 d D B 1 
H12A H 0.3776 0.6490 0.2274 0.227 Uiso 1 1 calc R B 1 
H12B H 0.3180 0.6283 0.2120 0.227 Uiso 1 1 calc R B 1 
C13 C 0.3605(9) 0.5859(8) 0.3402(19) 0.166(8) Uani 1 1 d D B 1 
H13A H 0.3935 0.5953 0.3844 0.199 Uiso 1 1 calc R B 1 
H13B H 0.3303 0.5924 0.3966 0.199 Uiso 1 1 calc R B 1 
C14 C 0.3616(9) 0.5322(8) 0.3009(17) 0.170(8) Uani 1 1 d D B 1 
H14A H 0.3775 0.5051 0.3560 0.203 Uiso 1 1 d RD B 1 
H14B H 0.3260 0.5204 0.2748 0.203 Uiso 1 1 d R B 1 
N6 N 0.4910(8) 0.7095(7) 0.9758(18) 0.148(8) Uani 1 1 d . . . 
O7 O 0.4680(10) 0.7281(8) 0.888(2) 0.282(13) Uani 1 1 d . . . 
O8 O 0.5378(9) 0.7090(10) 0.976(3) 0.321(17) Uani 1 1 d . . . 
O6 O 0.4681(8) 0.6882(10) 1.058(2) 0.258(13) Uani 1 1 d . . . 
N5 N 0.5000 0.5000 0.5000 0.083(8) Uani 1 2 d S . . 
O5 O 0.5379(9) 0.498(2) 0.571(2) 0.135(13) Uani 0.50 1 d P . . 
O4 O 0.4830(13) 0.5387(9) 0.444(2) 0.096(9) Uani 0.50 1 d P . . 
O3 O 0.4715(8) 0.4591(7) 0.477(2) 0.102(7) Uani 0.50 1 d P . . 
N7 N 0.3092(8) 0.2008(7) 0.495(2) 0.45(5) Uani 0.50 1 d PR B . 
O9 O 0.3037(8) 0.2007(7) 0.612(2) 0.31(2) Uani 0.50 1 d PR . . 
O11 O 0.3526(8) 0.1871(7) 0.450(2) 0.264(17) Uani 0.50 1 d PR . . 
O10 O 0.2702(8) 0.2110(7) 0.423(2) 0.70(8) Uani 0.50 1 d PR . . 
 
loop_ 
 _atom_site_aniso_label 
 _atom_site_aniso_U_11 
 _atom_site_aniso_U_22 
 _atom_site_aniso_U_33 
 _atom_site_aniso_U_23 
 _atom_site_aniso_U_13 
 _atom_site_aniso_U_12 
Cu1 0.0902(15) 0.0631(14) 0.1156(17) -0.0070(9) -0.0050(10) 0.0082(9) 
Cu2 0.0720(14) 0.0758(14) 0.0824(14) 0.0021(9) -0.0020(8) 0.0118(8) 
O1 0.069(6) 0.064(7) 0.106(7) -0.004(5) -0.002(5) 0.012(5) 
O2 0.090(7) 0.080(7) 0.128(8) 0.005(6) -0.015(6) 0.016(5) 
O1W 0.188(13) 0.159(11) 0.179(12) 0.018(10) -0.006(10) -0.013(9) 
C1 0.067(12) 0.058(12) 0.070(9) 0.000(8) 0.016(8) 0.009(10) 
C2 0.052(11) 0.067(12) 0.090(10) -0.004(8) 0.014(8) -0.004(10) 
C3 0.076(11) 0.067(11) 0.098(11) 0.007(8) 0.012(8) 0.013(11) 
C4 0.075(13) 0.071(13) 0.093(10) 0.008(8) 0.013(8) 0.021(10) 
C5 0.080(13) 0.069(12) 0.081(10) -0.017(7) 0.012(9) 0.003(10) 
C6 0.056(11) 0.068(13) 0.075(9) -0.009(8) 0.013(7) 0.012(11) 
C7 0.113(14) 0.072(11) 0.118(14) -0.002(10) 0.008(11) 0.018(10) 
C71 0.07(2) 0.09(2) 0.46(8) 0.02(3) -0.05(3) 0.021(17) 
C72 0.16(2) 0.098(18) 0.17(2) 0.061(17) 0.037(18) 0.077(16) 
C73 0.18(3) 0.14(2) 0.14(2) -0.033(19) 0.007(19) 0.08(2) 
C15 0.065(10) 0.084(13) 0.141(14) -0.010(11) -0.003(9) 0.006(10) 
N1 0.063(8) 0.081(9) 0.138(10) -0.007(8) -0.011(7) -0.002(7) 
C16 0.119(14) 0.106(13) 0.21(2) -0.040(14) -0.056(14) -0.005(10) 
C17 0.121(15) 0.115(15) 0.136(15) -0.004(10) -0.002(10) -0.015(10) 
C17A 0.13(2) 0.12(2) 0.13(2) -0.014(11) -0.006(11) 0.002(11) 
N3 0.131(11) 0.072(8) 0.138(11) -0.006(8) -0.005(9) 0.016(7) 
C18 0.165(11) 0.131(10) 0.152(10) 0.018(9) 0.012(9) -0.025(9) 
C19 0.218(14) 0.200(13) 0.222(14) 0.003(10) -0.012(10) 0.040(10) 
C20 0.177(12) 0.201(12) 0.187(12) -0.007(10) 0.011(10) -0.017(10) 
C21 0.206(13) 0.166(12) 0.180(12) -0.004(10) -0.001(10) -0.007(9) 
C8 0.093(14) 0.053(10) 0.114(12) -0.020(8) 0.002(10) 0.008(10) 
N2 0.069(9) 0.094(9) 0.088(8) -0.029(7) -0.008(6) -0.004(8) 
C9 0.088(12) 0.142(15) 0.124(14) -0.045(12) -0.008(10) 0.005(10) 
C10 0.126(15) 0.138(16) 0.128(15) -0.010(10) -0.002(10) 0.004(10) 
C10A 0.10(2) 0.10(2) 0.10(2) 0.004(8) -0.003(8) 0.001(8) 
N4 0.086(9) 0.105(10) 0.122(10) 0.015(8) 0.009(7) 0.025(7) 
C11 0.171(11) 0.185(12) 0.141(11) 0.022(9) -0.024(9) -0.008(9) 
C12 0.180(13) 0.163(12) 0.225(13) 0.017(10) 0.009(10) 0.033(9) 
C13 0.158(11) 0.186(12) 0.153(11) -0.038(10) 0.014(9) -0.006(9) 
C14 0.165(12) 0.183(12) 0.161(12) 0.037(9) -0.014(9) 0.002(10) 
N6 0.157(19) 0.116(16) 0.17(2) -0.037(15) -0.055(17) 0.027(14) 
O7 0.36(3) 0.174(18) 0.31(3) 0.061(19) -0.09(2) -0.021(17) 
O8 0.19(2) 0.33(3) 0.44(4) 0.03(3) -0.06(2) 0.030(19) 
O6 0.25(2) 0.25(2) 0.28(3) 0.111(19) 0.019(19) 0.005(15) 
N5 0.14(2) 0.013(11) 0.096(19) -0.001(13) 0.058(17) -0.010(15) 
O5 0.087(19) 0.25(4) 0.066(18) 0.06(3) -0.045(12) -0.02(2) 
O4 0.13(2) 0.060(16) 0.10(2) 0.005(14) 0.014(19) 0.015(14) 
O3 0.15(2) 0.11(2) 0.049(13) 0.021(14) -0.030(14) 0.017(17) 
N7 0.45(5) 0.45(5) 0.45(5) 0.000(11) -0.003(11) -0.004(11) 
O9 0.31(2) 0.30(2) 0.31(2) 0.014(11) -0.006(11) -0.011(11) 
O11 0.263(19) 0.250(19) 0.279(19) -0.010(11) 0.002(11) 0.002(11) 
O10 0.70(8) 0.70(8) 0.71(8) 0.002(11) -0.004(11) -0.004(11) 
 
_geom_special_details 
; 
 All esds (except the esd in the dihedral angle between two l.s. planes) 
 are estimated using the full covariance matrix.  The cell esds are taken 
 into account individually in the estimation of esds in distances, angles 
 and torsion angles; correlations between esds in cell parameters are only 
 used when they are defined by crystal symmetry.  An approximate (isotropic) 
 treatment of cell esds is used for estimating esds involving l.s. planes. 
; 
 
loop_ 
 _geom_bond_atom_site_label_1 
 _geom_bond_atom_site_label_2 
 _geom_bond_distance 
 _geom_bond_site_symmetry_2 
 _geom_bond_publ_flag 
Cu1 N1 1.932(11) . ? 
Cu1 O2 1.933(10) . ? 
Cu1 O1 1.977(9) . ? 
Cu1 N3 2.043(12) . ? 
Cu1 O1W 2.393(14) . ? 
Cu1 Cu2 2.934(2) . ? 
Cu2 O2 1.918(10) . ? 
Cu2 N2 1.934(11) . ? 
Cu2 O1 1.973(9) . ? 
Cu2 N4 2.007(12) . ? 
Cu2 O4 2.38(3) . ? 
Cu2 O5 2.39(3) 5_666 ? 
O1 C1 1.340(15) . ? 
O2 H22 0.86(2) . ? 
O1W H1W 0.8324 . ? 
O1W H2W 0.7942 . ? 
C1 C2 1.400(17) . ? 
C1 C6 1.406(17) . ? 
C2 C3 1.386(18) . ? 
C2 C15 1.432(18) . ? 
C3 C4 1.421(18) . ? 
C3 H3 0.9300 . ? 
C4 C5 1.362(18) . ? 
C4 C7 1.55(2) . ? 
C5 C6 1.356(18) . ? 
C5 H5 0.9300 . ? 
C6 C8 1.445(19) . ? 
C7 C73 1.43(3) . ? 
C7 C71A 1.46(5) . ? 
C7 C72 1.50(3) . ? 
C7 C73A 1.57(5) . ? 
C7 C71 1.60(3) . ? 
C7 C72A 1.61(5) . ? 
C71 H71A 0.9600 . ? 
C71 H71B 0.9600 . ? 
C71 H71C 0.9600 . ? 
C72 H72A 0.9600 . ? 
C72 H72B 0.9600 . ? 
C72 H72C 0.9600 . ? 
C73 H73A 0.9600 . ? 
C73 H73B 0.9600 . ? 
C73 H73C 0.9600 . ? 
C71A H71D 0.9600 . ? 
C71A H71E 0.9600 . ? 
C71A H71F 0.9600 . ? 
C72A H72D 0.9600 . ? 
C72A H72E 0.9600 . ? 
C72A H72F 0.9600 . ? 
C73A H73D 0.9600 . ? 
C73A H73E 0.9600 . ? 
C73A H73F 0.9600 . ? 
C15 N1 1.306(16) . ? 
C15 H15 0.9300 . ? 
N1 C16 1.500(15) . ? 
C16 C17 1.492(18) . ? 
C16 C17A 1.52(2) . ? 
C16 H16A 0.9700 . ? 
C16 H16B 0.9700 . ? 
C16 H16C 0.9700 . ? 
C16 H16D 0.9700 . ? 
C17 N3 1.547(18) . ? 
C17 H17A 0.9700 . ? 
C17 H17B 0.9700 . ? 
C17A H17C 0.9700 . ? 
C17A H17D 0.9700 . ? 
N3 C21 1.439(16) . ? 
N3 C18 1.468(15) . ? 
C18 C19 1.468(17) . ? 
C18 H18A 0.9700 . ? 
C18 H18B 0.9700 . ? 
C19 C20 1.45(2) . ? 
C19 H19A 0.9700 . ? 
C19 H19B 0.9700 . ? 
C20 C21 1.428(17) . ? 
C20 H20A 0.9700 . ? 
C20 H20B 0.9700 . ? 
C21 H21A 0.9700 . ? 
C21 H21B 0.9700 . ? 
C8 N2 1.280(16) . ? 
C8 H8 0.9300 . ? 
N2 C9 1.477(14) . ? 
C9 C10A 1.477(19) . ? 
C9 C10 1.503(19) . ? 
C9 H9A 0.9700 . ? 
C9 H9B 0.9700 . ? 
C9 H9C 0.9700 . ? 
C9 H9D 0.9700 . ? 
C10 N4 1.554(18) . ? 
C10 H10A 0.9700 . ? 
C10 H10B 0.9700 . ? 
C10A H10C 0.9700 . ? 
C10A H10D 0.9700 . ? 
N4 C14 1.437(16) . ? 
N4 C11 1.484(15) . ? 
C11 C12 1.465(17) . ? 
C11 H11A 0.9700 . ? 
C11 H11B 0.9700 . ? 
C12 C13 1.46(2) . ? 
C12 H12A 0.9700 . ? 
C12 H12B 0.9700 . ? 
C13 C14 1.395(16) . ? 
C13 H13A 0.9700 . ? 
C13 H13B 0.9700 . ? 
C14 H14A 0.9700 . ? 
C14 H14B 0.9700 . ? 
N6 O8 1.161(14) . ? 
N6 O6 1.164(14) . ? 
N6 O7 1.178(15) . ? 
N5 O5 1.199(14) . ? 
N5 O5 1.199(14) 5_666 ? 
N5 O4 1.201(16) . ? 
N5 O4 1.201(16) 5_666 ? 
N5 O3 1.261(13) 5_666 ? 
N5 O3 1.261(13) . ? 
O5 O4 1.07(4) 5_666 ? 
O5 O3 1.19(4) 5_666 ? 
O5 Cu2 2.39(3) 5_666 ? 
O4 O5 1.07(4) 5_666 ? 
O4 O3 1.40(3) 5_666 ? 
O3 O5 1.19(4) 5_666 ? 
O3 O4 1.40(3) 5_666 ? 
N7 O11 1.2270 . ? 
N7 O9 1.2354 . ? 
N7 O10 1.2522 . ? 
 
loop_ 
 _geom_angle_atom_site_label_1 
 _geom_angle_atom_site_label_2 
 _geom_angle_atom_site_label_3 
 _geom_angle 
 _geom_angle_site_symmetry_1 
 _geom_angle_site_symmetry_3 
 _geom_angle_publ_flag 
N1 Cu1 O2 170.8(5) . . ? 
N1 Cu1 O1 90.7(5) . . ? 
O2 Cu1 O1 80.6(4) . . ? 
N1 Cu1 N3 85.2(5) . . ? 
O2 Cu1 N3 102.8(5) . . ? 
O1 Cu1 N3 168.9(5) . . ? 
N1 Cu1 O1W 91.6(5) . . ? 
O2 Cu1 O1W 92.4(4) . . ? 
O1 Cu1 O1W 96.6(4) . . ? 
N3 Cu1 O1W 93.9(5) . . ? 
N1 Cu1 Cu2 130.7(4) . . ? 
O2 Cu1 Cu2 40.2(3) . . ? 
O1 Cu1 Cu2 42.0(3) . . ? 
N3 Cu1 Cu2 137.9(4) . . ? 
O1W Cu1 Cu2 104.6(3) . . ? 
O2 Cu2 N2 168.0(5) . . ? 
O2 Cu2 O1 81.1(4) . . ? 
N2 Cu2 O1 89.7(4) . . ? 
O2 Cu2 N4 103.2(5) . . ? 
N2 Cu2 N4 85.7(5) . . ? 
O1 Cu2 N4 174.8(4) . . ? 
O2 Cu2 O4 77.2(6) . . ? 
N2 Cu2 O4 108.7(6) . . ? 
O1 Cu2 O4 79.5(8) . . ? 
N4 Cu2 O4 104.3(8) . . ? 
O2 Cu2 O5 102.0(13) . 5_666 ? 
N2 Cu2 O5 85.6(14) . 5_666 ? 
O1 Cu2 O5 90.7(5) . 5_666 ? 
N4 Cu2 O5 91.4(6) . 5_666 ? 
O4 Cu2 O5 25.9(10) . 5_666 ? 
O2 Cu2 Cu1 40.6(3) . . ? 
N2 Cu2 Cu1 131.5(4) . . ? 
O1 Cu2 Cu1 42.1(3) . . ? 
N4 Cu2 Cu1 142.7(4) . . ? 
O4 Cu2 Cu1 65.7(8) . . ? 
O5 Cu2 Cu1 89.7(9) 5_666 . ? 
C1 O1 Cu2 128.3(9) . . ? 
C1 O1 Cu1 128.7(9) . . ? 
Cu2 O1 Cu1 95.9(4) . . ? 
Cu2 O2 Cu1 99.3(4) . . ? 
Cu2 O2 H22 126(10) . . ? 
Cu1 O2 H22 122(10) . . ? 
Cu1 O1W H1W 108.2 . . ? 
Cu1 O1W H2W 122.2 . . ? 
H1W O1W H2W 115.8 . . ? 
O1 C1 C2 121.9(14) . . ? 
O1 C1 C6 120.9(14) . . ? 
C2 C1 C6 117.1(14) . . ? 
C3 C2 C1 120.3(13) . . ? 
C3 C2 C15 116.4(15) . . ? 
C1 C2 C15 123.1(14) . . ? 
C2 C3 C4 122.3(13) . . ? 
C2 C3 H3 118.8 . . ? 
C4 C3 H3 118.8 . . ? 
C5 C4 C3 114.5(12) . . ? 
C5 C4 C7 124.6(16) . . ? 
C3 C4 C7 120.8(16) . . ? 
C6 C5 C4 125.3(13) . . ? 
C6 C5 H5 117.4 . . ? 
C4 C5 H5 117.4 . . ? 
C5 C6 C1 120.3(14) . . ? 
C5 C6 C8 116.9(15) . . ? 
C1 C6 C8 122.7(14) . . ? 
C73 C7 C71A 134(3) . . ? 
C73 C7 C72 109(2) . . ? 
C71A C7 C72 70(2) . . ? 
C73 C7 C4 109.8(17) . . ? 
C71A C7 C4 115(2) . . ? 
C72 C7 C4 106.4(14) . . ? 
C73 C7 C73A 54(2) . . ? 
C71A C7 C73A 100(3) . . ? 
C72 C7 C73A 145(2) . . ? 
C4 C7 C73A 108(2) . . ? 
C73 C7 C71 112(2) . . ? 
C71A C7 C71 39(2) . . ? 
C72 C7 C71 108(2) . . ? 
C4 C7 C71 112.3(16) . . ? 
C73A C7 C71 64(2) . . ? 
C73 C7 C72A 50(2) . . ? 
C71A C7 C72A 121(3) . . ? 
C72 C7 C72A 61(2) . . ? 
C4 C7 C72A 108(2) . . ? 
C73A C7 C72A 102(3) . . ? 
C71 C7 C72A 140(2) . . ? 
C7 C71 H71A 109.5 . . ? 
C7 C71 H71B 109.5 . . ? 
H71A C71 H71B 109.5 . . ? 
C7 C71 H71C 109.5 . . ? 
H71A C71 H71C 109.5 . . ? 
H71B C71 H71C 109.5 . . ? 
C7 C72 H72A 109.5 . . ? 
C7 C72 H72B 109.5 . . ? 
H72A C72 H72B 109.5 . . ? 
C7 C72 H72C 109.5 . . ? 
H72A C72 H72C 109.5 . . ? 
H72B C72 H72C 109.5 . . ? 
C7 C73 H73A 109.5 . . ? 
C7 C73 H73B 109.5 . . ? 
H73A C73 H73B 109.5 . . ? 
C7 C73 H73C 109.5 . . ? 
H73A C73 H73C 109.5 . . ? 
H73B C73 H73C 109.5 . . ? 
C7 C71A H71D 109.5 . . ? 
C7 C71A H71E 109.5 . . ? 
H71D C71A H71E 109.5 . . ? 
C7 C71A H71F 109.5 . . ? 
H71D C71A H71F 109.5 . . ? 
H71E C71A H71F 109.5 . . ? 
C7 C72A H72D 109.5 . . ? 
C7 C72A H72E 109.5 . . ? 
H72D C72A H72E 109.5 . . ? 
C7 C72A H72F 109.5 . . ? 
H72D C72A H72F 109.5 . . ? 
H72E C72A H72F 109.5 . . ? 
C7 C73A H73D 109.5 . . ? 
C7 C73A H73E 109.5 . . ? 
H73D C73A H73E 109.5 . . ? 
C7 C73A H73F 109.5 . . ? 
H73D C73A H73F 109.5 . . ? 
H73E C73A H73F 109.5 . . ? 
N1 C15 C2 127.3(13) . . ? 
N1 C15 H15 116.4 . . ? 
C2 C15 H15 116.4 . . ? 
C15 N1 C16 120.7(12) . . ? 
C15 N1 Cu1 126.8(10) . . ? 
C16 N1 Cu1 112.1(9) . . ? 
C17 C16 N1 110.2(14) . . ? 
C17 C16 C17A 59.2(10) . . ? 
N1 C16 C17A 101.0(14) . . ? 
C17 C16 H16A 109.6 . . ? 
N1 C16 H16A 109.6 . . ? 
C17A C16 H16A 57.9 . . ? 
C17 C16 H16B 109.6 . . ? 
N1 C16 H16B 109.6 . . ? 
C17A C16 H16B 149.3 . . ? 
H16A C16 H16B 108.1 . . ? 
C17 C16 H16C 53.5 . . ? 
N1 C16 H16C 111.6 . . ? 
C17A C16 H16C 111.6 . . ? 
H16A C16 H16C 138.8 . . ? 
H16B C16 H16C 58.7 . . ? 
C17 C16 H16D 138.2 . . ? 
N1 C16 H16D 111.6 . . ? 
C17A C16 H16D 111.6 . . ? 
H16A C16 H16D 54.9 . . ? 
H16B C16 H16D 55.4 . . ? 
H16C C16 H16D 109.4 . . ? 
C16 C17 N3 105.9(12) . . ? 
C16 C17 H17A 112.1 . . ? 
N3 C17 H17A 110.2 . . ? 
C16 C17 H17B 110.1 . . ? 
N3 C17 H17B 109.8 . . ? 
H17A C17 H17B 108.7 . . ? 
C16 C17A H17C 109.6 . . ? 
C16 C17A H17D 112.5 . . ? 
H17C C17A H17D 108.7 . . ? 
C21 N3 C18 104.4(13) . . ? 
C21 N3 C17 118.1(14) . . ? 
C18 N3 C17 98.9(12) . . ? 
C21 N3 Cu1 113.2(12) . . ? 
C18 N3 Cu1 119.2(12) . . ? 
C17 N3 Cu1 102.9(10) . . ? 
N3 C18 C19 100.9(13) . . ? 
N3 C18 H18A 111.6 . . ? 
C19 C18 H18A 111.6 . . ? 
N3 C18 H18B 111.6 . . ? 
C19 C18 H18B 111.6 . . ? 
H18A C18 H18B 109.4 . . ? 
C20 C19 C18 109.2(16) . . ? 
C20 C19 H19A 109.8 . . ? 
C18 C19 H19A 109.8 . . ? 
C20 C19 H19B 109.8 . . ? 
C18 C19 H19B 109.8 . . ? 
H19A C19 H19B 108.3 . . ? 
C21 C20 C19 104.2(16) . . ? 
C21 C20 H20A 110.9 . . ? 
C19 C20 H20A 110.9 . . ? 
C21 C20 H20B 110.9 . . ? 
C19 C20 H20B 110.9 . . ? 
H20A C20 H20B 108.9 . . ? 
C20 C21 N3 103.7(16) . . ? 
C20 C21 H21A 111.0 . . ? 
N3 C21 H21A 111.0 . . ? 
C20 C21 H21B 111.0 . . ? 
N3 C21 H21B 111.0 . . ? 
H21A C21 H21B 109.0 . . ? 
N2 C8 C6 127.1(13) . . ? 
N2 C8 H8 116.5 . . ? 
C6 C8 H8 116.5 . . ? 
C8 N2 C9 119.1(12) . . ? 
C8 N2 Cu2 127.4(9) . . ? 
C9 N2 Cu2 112.9(9) . . ? 
C10A C9 N2 105.1(15) . . ? 
C10A C9 C10 55.3(14) . . ? 
N2 C9 C10 107.6(14) . . ? 
C10A C9 H9A 59.4 . . ? 
N2 C9 H9A 110.2 . . ? 
C10 C9 H9A 110.2 . . ? 
C10A C9 H9B 144.7 . . ? 
N2 C9 H9B 110.2 . . ? 
C10 C9 H9B 110.2 . . ? 
H9A C9 H9B 108.5 . . ? 
C10A C9 H9C 110.7 . . ? 
N2 C9 H9C 110.7 . . ? 
C10 C9 H9C 58.1 . . ? 
H9A C9 H9C 139.0 . . ? 
H9B C9 H9C 54.3 . . ? 
C10A C9 H9D 110.7 . . ? 
N2 C9 H9D 110.7 . . ? 
C10 C9 H9D 141.6 . . ? 
H9A C9 H9D 53.3 . . ? 
H9B C9 H9D 58.1 . . ? 
H9C C9 H9D 108.8 . . ? 
C9 C10 N4 106.2(14) . . ? 
C9 C10 H10A 110.5 . . ? 
N4 C10 H10A 110.5 . . ? 
C9 C10 H10B 110.5 . . ? 
N4 C10 H10B 110.5 . . ? 
H10A C10 H10B 108.7 . . ? 
C9 C10A H10C 106.9 . . ? 
C9 C10A H10D 113.0 . . ? 
H10C C10A H10D 108.7 . . ? 
C14 N4 C11 105.5(13) . . ? 
C14 N4 C10 117.0(15) . . ? 
C11 N4 C10 97.2(13) . . ? 
C14 N4 Cu2 115.4(12) . . ? 
C11 N4 Cu2 117.4(11) . . ? 
C10 N4 Cu2 103.4(10) . . ? 
C12 C11 N4 99.3(13) . . ? 
C12 C11 H11A 111.9 . . ? 
N4 C11 H11A 111.9 . . ? 
C12 C11 H11B 111.9 . . ? 
N4 C11 H11B 111.9 . . ? 
H11A C11 H11B 109.6 . . ? 
C13 C12 C11 108.2(16) . . ? 
C13 C12 H12A 110.1 . . ? 
C11 C12 H12A 110.1 . . ? 
C13 C12 H12B 110.1 . . ? 
C11 C12 H12B 110.1 . . ? 
H12A C12 H12B 108.4 . . ? 
C14 C13 C12 105.0(16) . . ? 
C14 C13 H13A 110.7 . . ? 
C12 C13 H13A 110.7 . . ? 
C14 C13 H13B 110.7 . . ? 
C12 C13 H13B 110.7 . . ? 
H13A C13 H13B 108.8 . . ? 
C13 C14 N4 100.2(15) . . ? 
C13 C14 H14A 119.5 . . ? 
N4 C14 H14A 108.3 . . ? 
C13 C14 H14B 110.7 . . ? 
N4 C14 H14B 108.0 . . ? 
H14A C14 H14B 109.3 . . ? 
O8 N6 O6 119.0(15) . . ? 
O8 N6 O7 119.3(16) . . ? 
O6 N6 O7 121.5(15) . . ? 
O5 N5 O5 179.998(8) . 5_666 ? 
O5 N5 O4 127(2) . . ? 
O5 N5 O4 53(2) 5_666 . ? 
O5 N5 O4 53(2) . 5_666 ? 
O5 N5 O4 127(2) 5_666 5_666 ? 
O4 N5 O4 180.0(12) . 5_666 ? 
O5 N5 O3 58(2) . 5_666 ? 
O5 N5 O3 122(2) 5_666 5_666 ? 
O4 N5 O3 69.4(14) . 5_666 ? 
O4 N5 O3 110.6(14) 5_666 5_666 ? 
O5 N5 O3 122(2) . . ? 
O5 N5 O3 58(2) 5_666 . ? 
O4 N5 O3 110.6(14) . . ? 
O4 N5 O3 69.4(14) 5_666 . ? 
O3 N5 O3 180.0(16) 5_666 . ? 
O4 O5 O3 127.4(19) 5_666 5_666 ? 
O4 O5 N5 63.7(15) 5_666 . ? 
O3 O5 N5 63.8(14) 5_666 . ? 
O4 O5 Cu2 76(3) 5_666 5_666 ? 
O3 O5 Cu2 133(3) 5_666 5_666 ? 
N5 O5 Cu2 119(2) . 5_666 ? 
O5 O4 N5 63.4(16) 5_666 . ? 
O5 O4 O3 121(2) 5_666 5_666 ? 
N5 O4 O3 57.3(11) . 5_666 ? 
O5 O4 Cu2 78(2) 5_666 . ? 
N5 O4 Cu2 119.7(16) . . ? 
O3 O4 Cu2 131.4(18) 5_666 . ? 
O5 O3 N5 58.5(14) 5_666 . ? 
O5 O3 O4 111.8(18) 5_666 5_666 ? 
N5 O3 O4 53.3(9) . 5_666 ? 
O11 N7 O9 118.8 . . ? 
O11 N7 O10 120.0 . . ? 
O9 N7 O10 121.0 . . ? 
 
loop_ 
 _geom_torsion_atom_site_label_1 
 _geom_torsion_atom_site_label_2 
 _geom_torsion_atom_site_label_3 
 _geom_torsion_atom_site_label_4 
 _geom_torsion 
 _geom_torsion_site_symmetry_1 
 _geom_torsion_site_symmetry_2 
 _geom_torsion_site_symmetry_3 
 _geom_torsion_site_symmetry_4 
 _geom_torsion_publ_flag 
N1 Cu1 Cu2 O2 178.8(7) . . . . ? 
O1 Cu1 Cu2 O2 -159.7(6) . . . . ? 
N3 Cu1 Cu2 O2 37.0(8) . . . . ? 
O1W Cu1 Cu2 O2 -76.0(6) . . . . ? 
N1 Cu1 Cu2 N2 -14.0(7) . . . . ? 
O2 Cu1 Cu2 N2 167.2(7) . . . . ? 
O1 Cu1 Cu2 N2 7.5(6) . . . . ? 
N3 Cu1 Cu2 N2 -155.8(7) . . . . ? 
O1W Cu1 Cu2 N2 91.1(6) . . . . ? 
N1 Cu1 Cu2 O1 -21.5(6) . . . . ? 
O2 Cu1 Cu2 O1 159.7(6) . . . . ? 
N3 Cu1 Cu2 O1 -163.3(7) . . . . ? 
O1W Cu1 Cu2 O1 83.6(5) . . . . ? 
N1 Cu1 Cu2 N4 161.8(8) . . . . ? 
O2 Cu1 Cu2 N4 -17.1(8) . . . . ? 
O1 Cu1 Cu2 N4 -176.7(7) . . . . ? 
N3 Cu1 Cu2 N4 19.9(8) . . . . ? 
O1W Cu1 Cu2 N4 -93.1(7) . . . . ? 
N1 Cu1 Cu2 O4 80.1(7) . . . . ? 
O2 Cu1 Cu2 O4 -98.7(7) . . . . ? 
O1 Cu1 Cu2 O4 101.6(6) . . . . ? 
N3 Cu1 Cu2 O4 -61.7(8) . . . . ? 
O1W Cu1 Cu2 O4 -174.8(6) . . . . ? 
N1 Cu1 Cu2 O5 69.9(12) . . . 5_666 ? 
O2 Cu1 Cu2 O5 -109.0(12) . . . 5_666 ? 
O1 Cu1 Cu2 O5 91.4(12) . . . 5_666 ? 
N3 Cu1 Cu2 O5 -72.0(12) . . . 5_666 ? 
O1W Cu1 Cu2 O5 175.0(12) . . . 5_666 ? 
O2 Cu2 O1 C1 165.4(10) . . . . ? 
N2 Cu2 O1 C1 -22.3(10) . . . . ? 
N4 Cu2 O1 C1 -50(5) . . . . ? 
O4 Cu2 O1 C1 86.9(10) . . . . ? 
O5 Cu2 O1 C1 63.4(16) 5_666 . . . ? 
Cu1 Cu2 O1 C1 152.1(11) . . . . ? 
O2 Cu2 O1 Cu1 13.2(4) . . . . ? 
N2 Cu2 O1 Cu1 -174.4(4) . . . . ? 
N4 Cu2 O1 Cu1 158(5) . . . . ? 
O4 Cu2 O1 Cu1 -65.2(6) . . . . ? 
O5 Cu2 O1 Cu1 -88.8(14) 5_666 . . . ? 
N1 Cu1 O1 C1 11.9(10) . . . . ? 
O2 Cu1 O1 C1 -165.1(10) . . . . ? 
N3 Cu1 O1 C1 -56(3) . . . . ? 
O1W Cu1 O1 C1 103.6(10) . . . . ? 
Cu2 Cu1 O1 C1 -152.0(11) . . . . ? 
N1 Cu1 O1 Cu2 163.9(5) . . . . ? 
O2 Cu1 O1 Cu2 -13.1(4) . . . . ? 
N3 Cu1 O1 Cu2 95(2) . . . . ? 
O1W Cu1 O1 Cu2 -104.5(4) . . . . ? 
N2 Cu2 O2 Cu1 -53(2) . . . . ? 
O1 Cu2 O2 Cu1 -13.6(4) . . . . ? 
N4 Cu2 O2 Cu1 169.5(5) . . . . ? 
O4 Cu2 O2 Cu1 67.5(8) . . . . ? 
O5 Cu2 O2 Cu1 75.2(7) 5_666 . . . ? 
N1 Cu1 O2 Cu2 -6(3) . . . . ? 
O1 Cu1 O2 Cu2 13.6(4) . . . . ? 
N3 Cu1 O2 Cu2 -155.6(5) . . . . ? 
O1W Cu1 O2 Cu2 109.9(5) . . . . ? 
Cu2 O1 C1 C2 -159.5(9) . . . . ? 
Cu1 O1 C1 C2 -16.1(16) . . . . ? 
Cu2 O1 C1 C6 22.9(15) . . . . ? 
Cu1 O1 C1 C6 166.3(8) . . . . ? 
O1 C1 C2 C3 -175.4(11) . . . . ? 
C6 C1 C2 C3 2.3(17) . . . . ? 
O1 C1 C2 C15 10.2(18) . . . . ? 
C6 C1 C2 C15 -172.1(12) . . . . ? 
C1 C2 C3 C4 -0.2(18) . . . . ? 
C15 C2 C3 C4 174.5(12) . . . . ? 
C2 C3 C4 C5 -2.0(18) . . . . ? 
C2 C3 C4 C7 179.7(12) . . . . ? 
C3 C4 C5 C6 2.3(19) . . . . ? 
C7 C4 C5 C6 -179.4(13) . . . . ? 
C4 C5 C6 C1 0(2) . . . . ? 
C4 C5 C6 C8 -176.9(12) . . . . ? 
O1 C1 C6 C5 175.6(11) . . . . ? 
C2 C1 C6 C5 -2.1(17) . . . . ? 
O1 C1 C6 C8 -7.9(17) . . . . ? 
C2 C1 C6 C8 174.4(11) . . . . ? 
C5 C4 C7 C73 55(3) . . . . ? 
C3 C4 C7 C73 -127(2) . . . . ? 
C5 C4 C7 C71A -137(3) . . . . ? 
C3 C4 C7 C71A 41(3) . . . . ? 
C5 C4 C7 C72 -63(2) . . . . ? 
C3 C4 C7 C72 115.4(19) . . . . ? 
C5 C4 C7 C73A 112(3) . . . . ? 
C3 C4 C7 C73A -70(3) . . . . ? 
C5 C4 C7 C71 180(3) . . . . ? 
C3 C4 C7 C71 -2(3) . . . . ? 
C5 C4 C7 C72A 2(3) . . . . ? 
C3 C4 C7 C72A 180(3) . . . . ? 
C3 C2 C15 N1 -177.6(14) . . . . ? 
C1 C2 C15 N1 -3(2) . . . . ? 
C2 C15 N1 C16 174.4(15) . . . . ? 
C2 C15 N1 Cu1 2(2) . . . . ? 
O2 Cu1 N1 C15 14(4) . . . . ? 
O1 Cu1 N1 C15 -4.5(13) . . . . ? 
N3 Cu1 N1 C15 165.1(14) . . . . ? 
O1W Cu1 N1 C15 -101.2(13) . . . . ? 
Cu2 Cu1 N1 C15 9.7(16) . . . . ? 
O2 Cu1 N1 C16 -159(3) . . . . ? 
O1 Cu1 N1 C16 -177.8(11) . . . . ? 
N3 Cu1 N1 C16 -8.2(12) . . . . ? 
O1W Cu1 N1 C16 85.5(12) . . . . ? 
Cu2 Cu1 N1 C16 -163.6(10) . . . . ? 
C15 N1 C16 C17 166.5(14) . . . . ? 
Cu1 N1 C16 C17 -19.8(17) . . . . ? 
C15 N1 C16 C17A -132.5(15) . . . . ? 
Cu1 N1 C16 C17A 41.3(15) . . . . ? 
N1 C16 C17 N3 46.6(17) . . . . ? 
C17A C16 C17 N3 -44.4(15) . . . . ? 
C16 C17 N3 C21 75.4(19) . . . . ? 
C16 C17 N3 C18 -172.9(15) . . . . ? 
C16 C17 N3 Cu1 -50.0(14) . . . . ? 
N1 Cu1 N3 C21 -96.3(12) . . . . ? 
O2 Cu1 N3 C21 79.2(12) . . . . ? 
O1 Cu1 N3 C21 -27(3) . . . . ? 
O1W Cu1 N3 C21 172.5(12) . . . . ? 
Cu2 Cu1 N3 C21 55.7(14) . . . . ? 
N1 Cu1 N3 C18 140.3(12) . . . . ? 
O2 Cu1 N3 C18 -44.2(12) . . . . ? 
O1 Cu1 N3 C18 -151(2) . . . . ? 
O1W Cu1 N3 C18 49.1(12) . . . . ? 
Cu2 Cu1 N3 C18 -67.7(14) . . . . ? 
N1 Cu1 N3 C17 32.3(10) . . . . ? 
O2 Cu1 N3 C17 -152.3(9) . . . . ? 
O1 Cu1 N3 C17 101(2) . . . . ? 
O1W Cu1 N3 C17 -59.0(10) . . . . ? 
Cu2 Cu1 N3 C17 -175.7(8) . . . . ? 
C21 N3 C18 C19 -35(2) . . . . ? 
C17 N3 C18 C19 -157.3(17) . . . . ? 
Cu1 N3 C18 C19 92.5(17) . . . . ? 
N3 C18 C19 C20 15(3) . . . . ? 
C18 C19 C20 C21 10(3) . . . . ? 
C19 C20 C21 N3 -32(2) . . . . ? 
C18 N3 C21 C20 43(2) . . . . ? 
C17 N3 C21 C20 151.9(16) . . . . ? 
Cu1 N3 C21 C20 -87.9(17) . . . . ? 
C5 C6 C8 N2 175.3(13) . . . . ? 
C1 C6 C8 N2 -1(2) . . . . ? 
C6 C8 N2 C9 -175.2(13) . . . . ? 
C6 C8 N2 Cu2 -5(2) . . . . ? 
O2 Cu2 N2 C8 52(3) . . . . ? 
O1 Cu2 N2 C8 12.8(12) . . . . ? 
N4 Cu2 N2 C8 -169.7(13) . . . . ? 
O4 Cu2 N2 C8 -66.0(15) . . . . ? 
O5 Cu2 N2 C8 -78.0(13) 5_666 . . . ? 
Cu1 Cu2 N2 C8 7.7(14) . . . . ? 
O2 Cu2 N2 C9 -137(2) . . . . ? 
O1 Cu2 N2 C9 -176.2(10) . . . . ? 
N4 Cu2 N2 C9 1.3(10) . . . . ? 
O4 Cu2 N2 C9 105.0(12) . . . . ? 
O5 Cu2 N2 C9 93.1(11) 5_666 . . . ? 
Cu1 Cu2 N2 C9 178.8(8) . . . . ? 
C8 N2 C9 C10A 141.1(15) . . . . ? 
Cu2 N2 C9 C10A -30.7(16) . . . . ? 
C8 N2 C9 C10 -161.1(14) . . . . ? 
Cu2 N2 C9 C10 27.0(16) . . . . ? 
C10A C9 C10 N4 46.5(15) . . . . ? 
N2 C9 C10 N4 -49.9(19) . . . . ? 
C9 C10 N4 C14 -79.1(19) . . . . ? 
C9 C10 N4 C11 169.5(17) . . . . ? 
C9 C10 N4 Cu2 49.0(17) . . . . ? 
O2 Cu2 N4 C14 -86.8(11) . . . . ? 
N2 Cu2 N4 C14 101.3(11) . . . . ? 
O1 Cu2 N4 C14 129(5) . . . . ? 
O4 Cu2 N4 C14 -7.0(12) . . . . ? 
O5 Cu2 N4 C14 15.8(17) 5_666 . . . ? 
Cu1 Cu2 N4 C14 -75.5(12) . . . . ? 
O2 Cu2 N4 C11 38.5(12) . . . . ? 
N2 Cu2 N4 C11 -133.3(12) . . . . ? 
O1 Cu2 N4 C11 -105(5) . . . . ? 
O4 Cu2 N4 C11 118.4(12) . . . . ? 
O5 Cu2 N4 C11 141.2(17) 5_666 . . . ? 
Cu1 Cu2 N4 C11 49.8(14) . . . . ? 
O2 Cu2 N4 C10 144.1(11) . . . . ? 
N2 Cu2 N4 C10 -27.7(11) . . . . ? 
O1 Cu2 N4 C10 0(5) . . . . ? 
O4 Cu2 N4 C10 -136.0(11) . . . . ? 
O5 Cu2 N4 C10 -113.2(17) 5_666 . . . ? 
Cu1 Cu2 N4 C10 155.4(10) . . . . ? 
C14 N4 C11 C12 34(2) . . . . ? 
C10 N4 C11 C12 154.9(18) . . . . ? 
Cu2 N4 C11 C12 -95.9(17) . . . . ? 
N4 C11 C12 C13 -9(3) . . . . ? 
C11 C12 C13 C14 -20(3) . . . . ? 
C12 C13 C14 N4 40(2) . . . . ? 
C11 N4 C14 C13 -47.5(19) . . . . ? 
C10 N4 C14 C13 -154.2(16) . . . . ? 
Cu2 N4 C14 C13 83.8(15) . . . . ? 
O5 N5 O5 O4 110(25) 5_666 . . 5_666 ? 
O4 N5 O5 O4 -179.995(8) . . . 5_666 ? 
O3 N5 O5 O4 -178(3) 5_666 . . 5_666 ? 
O3 N5 O5 O4 2(3) . . . 5_666 ? 
O5 N5 O5 O3 -71(24) 5_666 . . 5_666 ? 
O4 N5 O5 O3 -2(3) . . . 5_666 ? 
O4 N5 O5 O3 178(3) 5_666 . . 5_666 ? 
O3 N5 O5 O3 180.000(7) . . . 5_666 ? 
O5 N5 O5 Cu2 55(24) 5_666 . . 5_666 ? 
O4 N5 O5 Cu2 125(3) . . . 5_666 ? 
O4 N5 O5 Cu2 -55(3) 5_666 . . 5_666 ? 
O3 N5 O5 Cu2 127(4) 5_666 . . 5_666 ? 
O3 N5 O5 Cu2 -53(4) . . . 5_666 ? 
O5 N5 O4 O5 180.003(8) . . . 5_666 ? 
O4 N5 O4 O5 99(8) 5_666 . . 5_666 ? 
O3 N5 O4 O5 179(3) 5_666 . . 5_666 ? 
O3 N5 O4 O5 -1(3) . . . 5_666 ? 
O5 N5 O4 O3 1(3) . . . 5_666 ? 
O5 N5 O4 O3 -179(3) 5_666 . . 5_666 ? 
O4 N5 O4 O3 -79(7) 5_666 . . 5_666 ? 
O3 N5 O4 O3 180.000(5) . . . 5_666 ? 
O5 N5 O4 Cu2 124(2) . . . . ? 
O5 N5 O4 Cu2 -56(2) 5_666 . . . ? 
O4 N5 O4 Cu2 43(7) 5_666 . . . ? 
O3 N5 O4 Cu2 123(2) 5_666 . . . ? 
O3 N5 O4 Cu2 -57(2) . . . . ? 
O2 Cu2 O4 O5 163(3) . . . 5_666 ? 
N2 Cu2 O4 O5 -28(3) . . . 5_666 ? 
O1 Cu2 O4 O5 -114(3) . . . 5_666 ? 
N4 Cu2 O4 O5 62(3) . . . 5_666 ? 
Cu1 Cu2 O4 O5 -156(3) . . . 5_666 ? 
O2 Cu2 O4 N5 -148(2) . . . . ? 
N2 Cu2 O4 N5 21(3) . . . . ? 
O1 Cu2 O4 N5 -65(2) . . . . ? 
N4 Cu2 O4 N5 112(2) . . . . ? 
O5 Cu2 O4 N5 49(2) 5_666 . . . ? 
Cu1 Cu2 O4 N5 -107(2) . . . . ? 
O2 Cu2 O4 O3 -77(2) . . . 5_666 ? 
N2 Cu2 O4 O3 92(2) . . . 5_666 ? 
O1 Cu2 O4 O3 6(2) . . . 5_666 ? 
N4 Cu2 O4 O3 -178(2) . . . 5_666 ? 
O5 Cu2 O4 O3 120(3) 5_666 . . 5_666 ? 
Cu1 Cu2 O4 O3 -36(2) . . . 5_666 ? 
O5 N5 O3 O5 179.998(6) . . . 5_666 ? 
O4 N5 O3 O5 1(3) . . . 5_666 ? 
O4 N5 O3 O5 -179(3) 5_666 . . 5_666 ? 
O3 N5 O3 O5 -58(100) 5_666 . . 5_666 ? 
O5 N5 O3 O4 -1(3) . . . 5_666 ? 
O5 N5 O3 O4 179(3) 5_666 . . 5_666 ? 
O4 N5 O3 O4 179.996(4) . . . 5_666 ? 
O3 N5 O3 O4 121(100) 5_666 . . 5_666 ? 
 
_diffrn_measured_fraction_theta_max    0.997 
_diffrn_reflns_theta_full              23.08 
_diffrn_measured_fraction_theta_full   0.997 
_refine_diff_density_max    0.744 
_refine_diff_density_min   -0.355 
_refine_diff_density_rms    0.097 


#===END

 
data_10 
 
_audit_creation_method            SHELXL-97 
_chemical_name_systematic 
; 
 ? 
; 
_chemical_name_common             ? 
_chemical_melting_point           ? 
_chemical_formula_moiety          
 'C20 H35 Cl Cu2 N7 O6, 3(N O3), 2(H2 O)'  
_chemical_formula_sum 
 'C20 H39 Cl Cu2 N10 O17' 
_chemical_formula_weight          854.14 
 
loop_ 
 _atom_type_symbol 
 _atom_type_description 
 _atom_type_scat_dispersion_real 
 _atom_type_scat_dispersion_imag 
 _atom_type_scat_source 
 'C'  'C'   0.0033   0.0016 
 'International Tables Vol C Tables 4.2.6.8 and 6.1.1.4' 
 'H'  'H'   0.0000   0.0000 
 'International Tables Vol C Tables 4.2.6.8 and 6.1.1.4' 
 'N'  'N'   0.0061   0.0033 
 'International Tables Vol C Tables 4.2.6.8 and 6.1.1.4' 
 'O'  'O'   0.0106   0.0060 
 'International Tables Vol C Tables 4.2.6.8 and 6.1.1.4' 
 'Cu'  'Cu'   0.3201   1.2651 
 'International Tables Vol C Tables 4.2.6.8 and 6.1.1.4' 
 'Cl'  'Cl'   0.1484   0.1585 
 'International Tables Vol C Tables 4.2.6.8 and 6.1.1.4' 
 
_symmetry_cell_setting            'orthorhombic' 
_symmetry_space_group_name_H-M    'P na21'
 
loop_ 
 _symmetry_equiv_pos_as_xyz 
 'x, y, z' 
 '-x, -y, z+1/2' 
 'x+1/2, -y+1/2, z' 
 '-x+1/2, y+1/2, z+1/2' 
 
_cell_length_a                    8.7183(5) 
_cell_length_b                    40.122(3) 
_cell_length_c                    9.5437(6) 
_cell_angle_alpha                 90.00 
_cell_angle_beta                  90.00 
_cell_angle_gamma                 90.00 
_cell_volume                      3338.3(4) 
_cell_formula_units_Z             4 
_cell_measurement_temperature     296(2) 
_cell_measurement_reflns_used     ? 
_cell_measurement_theta_min       ? 
_cell_measurement_theta_max       ? 
 
_exptl_crystal_description        'block' 
_exptl_crystal_colour             'green' 
_exptl_crystal_size_max           0.41
_exptl_crystal_size_mid           0.36
_exptl_crystal_size_min           0.35  
_exptl_crystal_density_meas       ? 
_exptl_crystal_density_diffrn     1.699 
_exptl_crystal_density_method     'not measured' 
_exptl_crystal_F_000              1760 
_exptl_absorpt_coefficient_mu     1.443 
_exptl_absorpt_correction_type    'MULTI-SCAN'
_exptl_absorpt_correction_T_min      0.5306
_exptl_absorpt_correction_T_max      0.6722
_exptl_absorpt_process_details    'BRUKER SADABS'
 
_exptl_special_details 
; 
 ? 
; 
 
_diffrn_ambient_temperature       296(2) 
_diffrn_radiation_wavelength      0.71073 
_diffrn_radiation_type            MoK\a 
_diffrn_radiation_source          'fine-focus sealed tube'
_diffrn_radiation_monochromator   graphite 
_diffrn_measurement_device_type   'BRUKER SMART APEX CCD DIFFRACTOMETER' 
_diffrn_measurement_method        'OMEGA-PHI SCAN'  
_diffrn_detector_area_resol_mean  ? 
_diffrn_standards_number          ? 
_diffrn_standards_interval_count  ? 
_diffrn_standards_interval_time   ? 
_diffrn_standards_decay_%         ? 
_diffrn_reflns_number             33586 
_diffrn_reflns_av_R_equivalents   0.1276 
_diffrn_reflns_av_sigmaI/netI     0.0859 
_diffrn_reflns_limit_h_min        -9 
_diffrn_reflns_limit_h_max        9 
_diffrn_reflns_limit_k_min        -45 
_diffrn_reflns_limit_k_max        45 
_diffrn_reflns_limit_l_min        -10 
_diffrn_reflns_limit_l_max        10 
_diffrn_reflns_theta_min          1.02 
_diffrn_reflns_theta_max          23.65 
_reflns_number_total              5005 
_reflns_number_gt                 3588 
_reflns_threshold_expression      >2sigma(I) 
 
_computing_data_collection        'BRUKER SMART' 
_computing_cell_refinement        'BRUKER SMART' 
_computing_data_reduction         'BRUKER SAINT' 
_computing_structure_solution     'SHELX97 (Sheldrick, 2008)'
_computing_structure_refinement   'SHELX97 (Sheldrick, 2008)'
_computing_molecular_graphics     'Ortep3 for Windows (Farrugia,1997)'
_computing_publication_material   'Wingx 1.80.05 (Farrugia, 1999)' 
 
_refine_special_details 
; 
 Refinement of F^2^ against ALL reflections.  The weighted R-factor wR and 
 goodness of fit S are based on F^2^, conventional R-factors R are based 
 on F, with F set to zero for negative F^2^. The threshold expression of 
 F^2^ > 2sigma(F^2^) is used only for calculating R-factors(gt) etc. and is 
 not relevant to the choice of reflections for refinement.  R-factors based 
 on F^2^ are statistically about twice as large as those based on F, and R- 
 factors based on ALL data will be even larger. 
; 
 
_refine_ls_structure_factor_coef  Fsqd  
_refine_ls_matrix_type            full 
_refine_ls_weighting_scheme       calc  
_refine_ls_weighting_details 
 'calc w=1/[\s^2^(Fo^2^)+(0.0509P)^2^+0.0000P] where P=(Fo^2^+2Fc^2^)/3' 
_atom_sites_solution_primary      direct 
_atom_sites_solution_secondary    difmap 
_atom_sites_solution_hydrogens    geom 
_refine_ls_hydrogen_treatment     mixed 
_refine_ls_extinction_method      none 
_refine_ls_extinction_coef        ? 
_refine_ls_abs_structure_details 
 'Flack H D (1983), Acta Cryst. A39, 876-881' 
_refine_ls_abs_structure_Flack    0.02(2) 
_refine_ls_number_reflns          5005 
_refine_ls_number_parameters      472 
_refine_ls_number_restraints      8 
_refine_ls_R_factor_all           0.0759 
_refine_ls_R_factor_gt            0.0488 
_refine_ls_wR_factor_ref          0.1089 
_refine_ls_wR_factor_gt           0.0967 
_refine_ls_goodness_of_fit_ref    0.951 
_refine_ls_restrained_S_all       0.951 
_refine_ls_shift/su_max           0.001 
_refine_ls_shift/su_mean          0.000 
 
loop_ 
 _atom_site_label 
 _atom_site_type_symbol 
 _atom_site_fract_x 
 _atom_site_fract_y 
 _atom_site_fract_z 
 _atom_site_U_iso_or_equiv 
 _atom_site_adp_type 
 _atom_site_occupancy 
 _atom_site_symmetry_multiplicity 
 _atom_site_calc_flag 
 _atom_site_refinement_flags 
 _atom_site_disorder_assembly 
 _atom_site_disorder_group 
Cu1 Cu 0.33381(9) 0.87218(2) 0.64531(9) 0.0407(2) Uani 1 1 d . . . 
Cu2 Cu 0.15265(10) 0.84204(2) 0.41570(9) 0.0419(2) Uani 1 1 d . . . 
Cl1 Cl 0.2712(3) 0.69861(5) 0.8668(3) 0.0907(9) Uani 1 1 d . . . 
O1W O 0.5676(7) 0.86835(15) 0.5336(7) 0.0625(16) Uani 1 1 d D . . 
H2W H 0.640(8) 0.862(2) 0.587(8) 0.094 Uiso 1 1 d D . . 
H1W H 0.562(12) 0.8489(11) 0.501(10) 0.094 Uiso 1 1 d D . . 
O1 O 0.2755(5) 0.82731(11) 0.5777(5) 0.0416(12) Uani 1 1 d . . . 
O2 O 0.2387(5) 0.88413(12) 0.4699(5) 0.0380(11) Uani 1 1 d D . . 
H2O H 0.302(6) 0.8884(18) 0.408(6) 0.057 Uiso 1 1 d D . . 
N1 N 0.4054(7) 0.85357(17) 0.8200(6) 0.0454(16) Uani 1 1 d . . . 
N3 N 0.3651(7) 0.91862(15) 0.7459(7) 0.0492(17) Uani 1 1 d . . . 
N5 N 0.3584(9) 0.97469(18) 0.5572(9) 0.078(2) Uani 1 1 d . . . 
H5A H 0.3767 0.9926 0.6117 0.093 Uiso 1 1 calc R . . 
H5B H 0.3508 0.9818 0.4681 0.093 Uiso 1 1 calc R . . 
N2 N 0.1036(7) 0.79658(15) 0.3725(6) 0.0475(16) Uani 1 1 d . . . 
N4 N 0.0393(6) 0.85387(14) 0.2302(6) 0.0399(15) Uani 1 1 d . . . 
N6 N -0.1000(7) 0.91908(15) 0.2165(7) 0.0528(16) Uani 1 1 d . . . 
H6A H -0.1223 0.9390 0.2552 0.063 Uiso 1 1 calc R . . 
H6B H -0.1396 0.9187 0.1295 0.063 Uiso 1 1 calc R . . 
C1 C 0.2672(7) 0.79918(17) 0.6458(8) 0.0420(17) Uani 1 1 d . . . 
C2 C 0.3273(9) 0.79549(18) 0.7815(7) 0.0441(18) Uani 1 1 d . . . 
C3 C 0.3258(8) 0.76456(19) 0.8491(8) 0.052(2) Uani 1 1 d . . . 
H3 H 0.3643 0.7628 0.9397 0.062 Uiso 1 1 calc R . . 
C4 C 0.2682(10) 0.7368(2) 0.7833(9) 0.058(2) Uani 1 1 d . . . 
C5 C 0.2070(9) 0.73966(18) 0.6533(10) 0.061(2) Uani 1 1 d . . . 
H5 H 0.1656 0.7209 0.6107 0.073 Uiso 1 1 calc R . . 
C6 C 0.2041(8) 0.77023(19) 0.5804(8) 0.048(2) Uani 1 1 d . . . 
C8 C 0.1324(9) 0.77024(18) 0.4418(9) 0.055(2) Uani 1 1 d . . . 
H8 H 0.1065 0.7498 0.4021 0.066 Uiso 1 1 calc R . . 
C9 C 0.0262(11) 0.79294(19) 0.2357(8) 0.065(3) Uani 1 1 d . . . 
H9A H -0.0841 0.7920 0.2486 0.078 Uiso 1 1 calc R . . 
H9B H 0.0591 0.7726 0.1901 0.078 Uiso 1 1 calc R . . 
C10 C 0.0684(9) 0.82246(17) 0.1485(9) 0.0538(19) Uani 1 1 d . . . 
H10A H 0.0079 0.8226 0.0633 0.065 Uiso 1 1 calc R . . 
H10B H 0.1759 0.8212 0.1228 0.065 Uiso 1 1 calc R . . 
C11 C 0.1055(8) 0.88232(16) 0.1478(9) 0.0431(17) Uani 1 1 d . . . 
H11A H 0.2160 0.8798 0.1435 0.052 Uiso 1 1 calc R . . 
H11B H 0.0664 0.8814 0.0527 0.052 Uiso 1 1 calc R . . 
C12 C 0.0686(9) 0.91513(19) 0.2084(9) 0.052(2) Uani 1 1 d . . . 
H12A H 0.1119 0.9326 0.1505 0.063 Uiso 1 1 calc R . . 
H12B H 0.1128 0.9169 0.3014 0.063 Uiso 1 1 calc R . . 
C13 C -0.1697(9) 0.8927(2) 0.2997(9) 0.062(2) Uani 1 1 d . . . 
H13A H -0.2803 0.8953 0.3001 0.074 Uiso 1 1 calc R . . 
H13B H -0.1337 0.8941 0.3957 0.074 Uiso 1 1 calc R . . 
C14 C -0.1289(8) 0.85959(19) 0.2398(9) 0.051(2) Uani 1 1 d . . . 
H14A H -0.1739 0.8423 0.2975 0.061 Uiso 1 1 calc R . . 
H14B H -0.1731 0.8578 0.1468 0.061 Uiso 1 1 calc R . . 
C15 C 0.3927(8) 0.8234(2) 0.8606(8) 0.047(2) Uani 1 1 d . . . 
H15 H 0.4289 0.8186 0.9501 0.057 Uiso 1 1 calc R . . 
C16 C 0.4707(10) 0.87863(19) 0.9118(9) 0.063(2) Uani 1 1 d . . . 
H16A H 0.5755 0.8835 0.8846 0.076 Uiso 1 1 calc R . . 
H16B H 0.4706 0.8708 1.0080 0.076 Uiso 1 1 calc R . . 
C17 C 0.3737(11) 0.9088(2) 0.8977(9) 0.072(3) Uani 1 1 d . . . 
H17A H 0.4172 0.9269 0.9522 0.087 Uiso 1 1 calc R . . 
H17B H 0.2716 0.9042 0.9331 0.087 Uiso 1 1 calc R . . 
C18 C 0.4994(10) 0.9371(2) 0.7038(10) 0.065(2) Uani 1 1 d . . . 
H18A H 0.5185 0.9546 0.7719 0.078 Uiso 1 1 calc R . . 
H18B H 0.5873 0.9223 0.7044 0.078 Uiso 1 1 calc R . . 
C19 C 0.4862(11) 0.9518(2) 0.5683(11) 0.075(3) Uani 1 1 d . . . 
H19A H 0.4739 0.9342 0.4993 0.089 Uiso 1 1 calc R . . 
H19B H 0.5804 0.9636 0.5468 0.089 Uiso 1 1 calc R . . 
C20 C 0.2149(11) 0.9596(3) 0.5987(10) 0.082(3) Uani 1 1 d . . . 
H20A H 0.1833 0.9438 0.5277 0.098 Uiso 1 1 calc R . . 
H20B H 0.1367 0.9767 0.6050 0.098 Uiso 1 1 calc R . . 
C21 C 0.2275(10) 0.9422(2) 0.7360(11) 0.072(3) Uani 1 1 d . . . 
H21A H 0.1343 0.9296 0.7521 0.087 Uiso 1 1 calc R . . 
H21B H 0.2355 0.9588 0.8097 0.087 Uiso 1 1 calc R . . 
N7 N -0.0619(8) 0.86421(18) 0.6796(7) 0.0568(19) Uani 1 1 d . . . 
N8 N 0.4903(9) 0.81205(18) 0.2666(8) 0.0566(18) Uani 1 1 d . . . 
N9 N 0.8641(10) 0.9814(3) 0.4648(12) 0.084(3) Uani 1 1 d . . . 
N10 N 0.5008(11) 0.9522(2) 0.2066(9) 0.076(2) Uani 1 1 d . . . 
O3 O 0.0552(6) 0.86714(16) 0.7532(6) 0.0758(19) Uani 1 1 d . . . 
O4 O -0.0631(7) 0.84754(15) 0.5698(7) 0.0687(17) Uani 1 1 d . . . 
O5 O -0.1816(7) 0.87806(16) 0.7170(8) 0.090(2) Uani 1 1 d . . . 
O6 O 0.4219(8) 0.83896(15) 0.2522(6) 0.0741(19) Uani 1 1 d . . . 
O7 O 0.5864(8) 0.80896(13) 0.3601(7) 0.0795(19) Uani 1 1 d . . . 
O8 O 0.4527(10) 0.78820(16) 0.1937(7) 0.110(3) Uani 1 1 d . . . 
O9 O 0.8944(10) 0.98321(19) 0.3406(9) 0.110(3) Uani 1 1 d . . . 
O10 O 0.8459(10) 0.9536(2) 0.5202(10) 0.126(3) Uani 1 1 d . . . 
O11 O 0.8557(13) 1.0063(2) 0.5368(9) 0.158(4) Uani 1 1 d . . . 
O12 O 0.4352(9) 0.9274(2) 0.2419(8) 0.117(3) Uani 1 1 d . . . 
O13 O 0.6035(9) 0.9525(2) 0.1275(10) 0.120(3) Uani 1 1 d . . . 
O14 O 0.4847(13) 0.9799(2) 0.2667(10) 0.154(4) Uani 1 1 d . . . 
O2W O -0.1415(10) 0.92348(16) 0.9333(8) 0.090(2) Uani 1 1 d D . . 
H4W H -0.194(11) 0.9412(16) 0.926(14) 0.135 Uiso 1 1 d D . . 
H3W H -0.126(13) 0.912(3) 0.859(7) 0.135 Uiso 1 1 d D . . 
O3W O 0.1845(9) 1.01152(18) 0.3360(9) 0.090(2) Uani 1 1 d D . . 
H5W H 0.262(13) 1.0002(15) 0.311(14) 0.136 Uiso 1 1 d D . . 
H6W H 0.193(14) 1.027(2) 0.277(11) 0.136 Uiso 1 1 d D . . 
 
loop_ 
 _atom_site_aniso_label 
 _atom_site_aniso_U_11 
 _atom_site_aniso_U_22 
 _atom_site_aniso_U_33 
 _atom_site_aniso_U_23 
 _atom_site_aniso_U_13 
 _atom_site_aniso_U_12 
Cu1 0.0439(5) 0.0441(5) 0.0342(5) 0.0015(4) -0.0081(5) -0.0050(4) 
Cu2 0.0491(5) 0.0393(5) 0.0373(5) 0.0003(4) -0.0126(5) -0.0039(4) 
Cl1 0.1081(19) 0.0567(13) 0.107(2) 0.0351(14) -0.0354(17) -0.0094(13) 
O1W 0.048(3) 0.079(4) 0.060(4) -0.010(3) -0.002(3) -0.001(3) 
O1 0.048(3) 0.033(3) 0.044(3) 0.005(2) -0.014(2) -0.002(2) 
O2 0.039(3) 0.042(3) 0.033(3) 0.006(2) -0.015(2) -0.002(2) 
N1 0.040(4) 0.059(5) 0.037(4) -0.007(3) -0.012(3) -0.002(3) 
N3 0.046(4) 0.044(4) 0.057(4) 0.003(3) -0.010(3) -0.009(3) 
N5 0.079(6) 0.070(5) 0.084(6) 0.010(4) -0.012(5) -0.006(5) 
N2 0.053(4) 0.046(4) 0.043(4) 0.002(3) -0.016(3) -0.002(3) 
N4 0.033(3) 0.045(4) 0.042(4) 0.001(3) -0.003(3) -0.002(3) 
N6 0.046(4) 0.058(4) 0.055(4) 0.006(3) 0.000(3) 0.011(3) 
C1 0.038(4) 0.046(4) 0.042(4) 0.001(4) -0.012(4) 0.000(3) 
C2 0.050(5) 0.044(5) 0.038(4) 0.008(4) -0.005(4) 0.003(4) 
C3 0.051(5) 0.060(5) 0.044(5) 0.014(4) -0.008(4) -0.006(4) 
C4 0.068(6) 0.045(5) 0.060(6) 0.022(4) -0.010(5) -0.001(4) 
C5 0.063(5) 0.045(5) 0.075(6) 0.012(5) -0.011(5) -0.004(4) 
C6 0.051(5) 0.040(4) 0.052(5) 0.003(4) -0.011(4) 0.005(4) 
C8 0.070(5) 0.036(4) 0.059(6) -0.011(4) -0.020(5) -0.003(4) 
C9 0.096(7) 0.049(5) 0.051(5) -0.003(4) -0.034(5) -0.011(5) 
C10 0.062(5) 0.052(5) 0.047(5) -0.003(5) -0.013(5) 0.001(4) 
C11 0.038(4) 0.051(5) 0.040(4) 0.008(4) 0.000(4) -0.004(3) 
C12 0.059(5) 0.047(5) 0.051(5) 0.010(4) -0.006(4) -0.006(4) 
C13 0.048(5) 0.073(6) 0.064(6) 0.018(5) 0.002(4) 0.001(5) 
C14 0.044(5) 0.059(5) 0.050(5) 0.003(4) 0.000(4) -0.007(4) 
C15 0.045(5) 0.064(6) 0.033(4) 0.007(4) -0.013(4) 0.007(4) 
C16 0.097(6) 0.061(5) 0.033(4) 0.001(5) -0.018(5) -0.011(5) 
C17 0.108(7) 0.075(6) 0.033(5) -0.004(5) 0.004(5) -0.025(6) 
C18 0.052(5) 0.063(6) 0.081(6) 0.012(5) -0.018(5) 0.004(5) 
C19 0.063(7) 0.086(7) 0.075(7) -0.003(6) 0.005(5) -0.022(6) 
C20 0.070(7) 0.095(8) 0.081(8) -0.013(6) -0.022(5) 0.027(6) 
C21 0.053(6) 0.069(6) 0.095(8) -0.022(6) 0.015(5) 0.002(5) 
N7 0.046(4) 0.069(5) 0.056(5) -0.006(4) 0.008(4) -0.010(4) 
N8 0.071(5) 0.054(5) 0.044(4) 0.004(4) -0.003(4) 0.007(4) 
N9 0.088(6) 0.077(7) 0.087(7) 0.014(6) 0.007(6) 0.020(5) 
N10 0.095(7) 0.072(6) 0.061(5) -0.014(5) 0.025(5) 0.017(5) 
O3 0.039(3) 0.119(6) 0.070(4) -0.027(4) -0.020(3) -0.003(3) 
O4 0.053(4) 0.095(5) 0.059(4) -0.027(4) 0.008(3) -0.009(3) 
O5 0.062(4) 0.093(5) 0.116(6) -0.051(4) -0.011(4) 0.015(4) 
O6 0.101(5) 0.052(4) 0.069(4) 0.009(3) -0.016(4) 0.016(4) 
O7 0.094(4) 0.067(4) 0.078(4) 0.004(3) -0.043(4) 0.009(3) 
O8 0.181(8) 0.068(4) 0.080(5) -0.030(4) -0.047(5) 0.029(5) 
O9 0.152(7) 0.089(6) 0.088(6) -0.009(5) 0.022(6) -0.006(5) 
O10 0.129(7) 0.112(7) 0.136(7) 0.016(6) 0.015(6) 0.001(6) 
O11 0.299(14) 0.082(6) 0.094(6) -0.024(5) 0.012(8) 0.045(7) 
O12 0.139(7) 0.127(7) 0.083(5) 0.024(5) -0.016(5) -0.084(6) 
O13 0.095(6) 0.143(7) 0.121(8) 0.023(6) 0.022(6) 0.013(5) 
O14 0.226(11) 0.107(7) 0.131(8) 0.019(6) 0.061(8) 0.036(7) 
O2W 0.132(6) 0.081(5) 0.057(4) -0.007(4) -0.016(5) 0.020(4) 
O3W 0.083(5) 0.094(6) 0.094(6) 0.009(5) 0.004(4) -0.007(4) 
 
_geom_special_details 
; 
 All esds (except the esd in the dihedral angle between two l.s. planes) 
 are estimated using the full covariance matrix.  The cell esds are taken 
 into account individually in the estimation of esds in distances, angles 
 and torsion angles; correlations between esds in cell parameters are only 
 used when they are defined by crystal symmetry.  An approximate (isotropic) 
 treatment of cell esds is used for estimating esds involving l.s. planes. 
; 
 
loop_ 
 _geom_bond_atom_site_label_1 
 _geom_bond_atom_site_label_2 
 _geom_bond_distance 
 _geom_bond_site_symmetry_2 
 _geom_bond_publ_flag 
Cu1 O2 1.929(5) . ? 
Cu1 N1 1.931(6) . ? 
Cu1 O1 1.979(4) . ? 
Cu1 N3 2.113(6) . ? 
Cu1 O1W 2.305(6) . ? 
Cu1 Cu2 2.9596(11) . ? 
Cu2 N2 1.919(6) . ? 
Cu2 O2 1.919(5) . ? 
Cu2 O1 1.972(5) . ? 
Cu2 N4 2.083(6) . ? 
Cu2 O4 2.398(6) . ? 
Cl1 C4 1.726(8) . ? 
O1W H2W 0.85(2) . ? 
O1W H1W 0.84(2) . ? 
O1 C1 1.304(8) . ? 
O2 H2O 0.83(2) . ? 
N1 C15 1.276(9) . ? 
N1 C16 1.450(9) . ? 
N3 C18 1.443(10) . ? 
N3 C17 1.504(11) . ? 
N3 C21 1.532(10) . ? 
N5 C20 1.445(12) . ? 
N5 C19 1.448(11) . ? 
N5 H5A 0.9000 . ? 
N5 H5B 0.9000 . ? 
N2 C8 1.272(9) . ? 
N2 C9 1.476(9) . ? 
N4 C14 1.487(9) . ? 
N4 C11 1.502(8) . ? 
N4 C10 1.503(9) . ? 
N6 C13 1.458(9) . ? 
N6 C12 1.480(9) . ? 
N6 H6A 0.9000 . ? 
N6 H6B 0.9000 . ? 
C1 C2 1.405(10) . ? 
C1 C6 1.429(10) . ? 
C2 C3 1.399(9) . ? 
C2 C15 1.466(10) . ? 
C3 C4 1.375(10) . ? 
C3 H3 0.9300 . ? 
C4 C5 1.356(11) . ? 
C5 C6 1.410(10) . ? 
C5 H5 0.9300 . ? 
C6 C8 1.463(10) . ? 
C8 H8 0.9300 . ? 
C9 C10 1.493(10) . ? 
C9 H9A 0.9700 . ? 
C9 H9B 0.9700 . ? 
C10 H10A 0.9700 . ? 
C10 H10B 0.9700 . ? 
C11 C12 1.473(10) . ? 
C11 H11A 0.9700 . ? 
C11 H11B 0.9700 . ? 
C12 H12A 0.9700 . ? 
C12 H12B 0.9700 . ? 
C13 C14 1.488(11) . ? 
C13 H13A 0.9700 . ? 
C13 H13B 0.9700 . ? 
C14 H14A 0.9700 . ? 
C14 H14B 0.9700 . ? 
C15 H15 0.9300 . ? 
C16 C17 1.482(11) . ? 
C16 H16A 0.9700 . ? 
C16 H16B 0.9700 . ? 
C17 H17A 0.9700 . ? 
C17 H17B 0.9700 . ? 
C18 C19 1.425(12) . ? 
C18 H18A 0.9700 . ? 
C18 H18B 0.9700 . ? 
C19 H19A 0.9700 . ? 
C19 H19B 0.9700 . ? 
C20 C21 1.489(12) . ? 
C20 H20A 0.9700 . ? 
C20 H20B 0.9700 . ? 
C21 H21A 0.9700 . ? 
C21 H21B 0.9700 . ? 
N7 O5 1.236(8) . ? 
N7 O4 1.243(8) . ? 
N7 O3 1.245(8) . ? 
N8 O8 1.227(8) . ? 
N8 O7 1.230(8) . ? 
N8 O6 1.241(8) . ? 
N9 O11 1.212(11) . ? 
N9 O9 1.217(10) . ? 
N9 O10 1.244(11) . ? 
N10 O13 1.171(10) . ? 
N10 O12 1.196(10) . ? 
N10 O14 1.256(10) . ? 
O2W H4W 0.85(2) . ? 
O2W H3W 0.86(2) . ? 
O3W H5W 0.85(2) . ? 
O3W H6W 0.85(2) . ? 
 
loop_ 
 _geom_angle_atom_site_label_1 
 _geom_angle_atom_site_label_2 
 _geom_angle_atom_site_label_3 
 _geom_angle 
 _geom_angle_site_symmetry_1 
 _geom_angle_site_symmetry_3 
 _geom_angle_publ_flag 
O2 Cu1 N1 170.0(2) . . ? 
O2 Cu1 O1 80.4(2) . . ? 
N1 Cu1 O1 90.7(2) . . ? 
O2 Cu1 N3 103.3(2) . . ? 
N1 Cu1 N3 84.7(3) . . ? 
O1 Cu1 N3 169.5(2) . . ? 
O2 Cu1 O1W 89.7(2) . . ? 
N1 Cu1 O1W 95.0(2) . . ? 
O1 Cu1 O1W 90.9(2) . . ? 
N3 Cu1 O1W 98.9(2) . . ? 
O2 Cu1 Cu2 39.59(14) . . ? 
N1 Cu1 Cu2 130.84(19) . . ? 
O1 Cu1 Cu2 41.39(13) . . ? 
N3 Cu1 Cu2 139.95(17) . . ? 
O1W Cu1 Cu2 95.88(16) . . ? 
N2 Cu2 O2 169.1(2) . . ? 
N2 Cu2 O1 90.3(2) . . ? 
O2 Cu2 O1 80.80(18) . . ? 
N2 Cu2 N4 85.9(2) . . ? 
O2 Cu2 N4 102.4(2) . . ? 
O1 Cu2 N4 173.2(2) . . ? 
N2 Cu2 O4 92.5(2) . . ? 
O2 Cu2 O4 93.5(2) . . ? 
O1 Cu2 O4 88.4(2) . . ? 
N4 Cu2 O4 97.4(2) . . ? 
N2 Cu2 Cu1 131.81(18) . . ? 
O2 Cu2 Cu1 39.84(13) . . ? 
O1 Cu2 Cu1 41.58(13) . . ? 
N4 Cu2 Cu1 142.16(16) . . ? 
O4 Cu2 Cu1 85.82(15) . . ? 
Cu1 O1W H2W 113(7) . . ? 
Cu1 O1W H1W 100(7) . . ? 
H2W O1W H1W 90(9) . . ? 
C1 O1 Cu2 128.3(4) . . ? 
C1 O1 Cu1 129.7(5) . . ? 
Cu2 O1 Cu1 97.0(2) . . ? 
Cu2 O2 Cu1 100.6(2) . . ? 
Cu2 O2 H2O 104(5) . . ? 
Cu1 O2 H2O 113(5) . . ? 
C15 N1 C16 120.5(7) . . ? 
C15 N1 Cu1 127.0(5) . . ? 
C16 N1 Cu1 112.4(5) . . ? 
C18 N3 C17 111.3(7) . . ? 
C18 N3 C21 107.5(6) . . ? 
C17 N3 C21 105.1(7) . . ? 
C18 N3 Cu1 115.5(5) . . ? 
C17 N3 Cu1 102.3(5) . . ? 
C21 N3 Cu1 114.6(5) . . ? 
C20 N5 C19 112.4(7) . . ? 
C20 N5 H5A 109.1 . . ? 
C19 N5 H5A 109.1 . . ? 
C20 N5 H5B 109.1 . . ? 
C19 N5 H5B 109.1 . . ? 
H5A N5 H5B 107.9 . . ? 
C8 N2 C9 117.9(6) . . ? 
C8 N2 Cu2 129.4(5) . . ? 
C9 N2 Cu2 112.7(5) . . ? 
C14 N4 C11 107.1(5) . . ? 
C14 N4 C10 109.2(5) . . ? 
C11 N4 C10 107.5(6) . . ? 
C14 N4 Cu2 116.8(5) . . ? 
C11 N4 Cu2 115.8(4) . . ? 
C10 N4 Cu2 99.8(4) . . ? 
C13 N6 C12 111.4(6) . . ? 
C13 N6 H6A 109.3 . . ? 
C12 N6 H6A 109.3 . . ? 
C13 N6 H6B 109.3 . . ? 
C12 N6 H6B 109.3 . . ? 
H6A N6 H6B 108.0 . . ? 
O1 C1 C2 122.0(6) . . ? 
O1 C1 C6 120.5(7) . . ? 
C2 C1 C6 117.4(7) . . ? 
C3 C2 C1 121.0(7) . . ? 
C3 C2 C15 116.3(6) . . ? 
C1 C2 C15 122.6(6) . . ? 
C4 C3 C2 120.8(7) . . ? 
C4 C3 H3 119.6 . . ? 
C2 C3 H3 119.6 . . ? 
C5 C4 C3 119.5(7) . . ? 
C5 C4 Cl1 120.3(7) . . ? 
C3 C4 Cl1 120.2(6) . . ? 
C4 C5 C6 122.2(8) . . ? 
C4 C5 H5 118.9 . . ? 
C6 C5 H5 118.9 . . ? 
C5 C6 C1 119.0(7) . . ? 
C5 C6 C8 117.0(7) . . ? 
C1 C6 C8 124.0(7) . . ? 
N2 C8 C6 123.7(7) . . ? 
N2 C8 H8 118.2 . . ? 
C6 C8 H8 118.2 . . ? 
N2 C9 C10 107.6(6) . . ? 
N2 C9 H9A 110.2 . . ? 
C10 C9 H9A 110.2 . . ? 
N2 C9 H9B 110.2 . . ? 
C10 C9 H9B 110.2 . . ? 
H9A C9 H9B 108.5 . . ? 
C9 C10 N4 109.5(7) . . ? 
C9 C10 H10A 109.8 . . ? 
N4 C10 H10A 109.8 . . ? 
C9 C10 H10B 109.8 . . ? 
N4 C10 H10B 109.8 . . ? 
H10A C10 H10B 108.2 . . ? 
C12 C11 N4 112.9(6) . . ? 
C12 C11 H11A 109.0 . . ? 
N4 C11 H11A 109.0 . . ? 
C12 C11 H11B 109.0 . . ? 
N4 C11 H11B 109.0 . . ? 
H11A C11 H11B 107.8 . . ? 
C11 C12 N6 109.4(6) . . ? 
C11 C12 H12A 109.8 . . ? 
N6 C12 H12A 109.8 . . ? 
C11 C12 H12B 109.8 . . ? 
N6 C12 H12B 109.8 . . ? 
H12A C12 H12B 108.2 . . ? 
N6 C13 C14 109.8(7) . . ? 
N6 C13 H13A 109.7 . . ? 
C14 C13 H13A 109.7 . . ? 
N6 C13 H13B 109.7 . . ? 
C14 C13 H13B 109.7 . . ? 
H13A C13 H13B 108.2 . . ? 
N4 C14 C13 113.4(6) . . ? 
N4 C14 H14A 108.9 . . ? 
C13 C14 H14A 108.9 . . ? 
N4 C14 H14B 108.9 . . ? 
C13 C14 H14B 108.9 . . ? 
H14A C14 H14B 107.7 . . ? 
N1 C15 C2 127.0(7) . . ? 
N1 C15 H15 116.5 . . ? 
C2 C15 H15 116.5 . . ? 
N1 C16 C17 106.7(7) . . ? 
N1 C16 H16A 110.4 . . ? 
C17 C16 H16A 110.4 . . ? 
N1 C16 H16B 110.4 . . ? 
C17 C16 H16B 110.4 . . ? 
H16A C16 H16B 108.6 . . ? 
C16 C17 N3 109.3(7) . . ? 
C16 C17 H17A 109.8 . . ? 
N3 C17 H17A 109.8 . . ? 
C16 C17 H17B 109.8 . . ? 
N3 C17 H17B 109.8 . . ? 
H17A C17 H17B 108.3 . . ? 
C19 C18 N3 113.6(8) . . ? 
C19 C18 H18A 108.9 . . ? 
N3 C18 H18A 108.9 . . ? 
C19 C18 H18B 108.9 . . ? 
N3 C18 H18B 108.9 . . ? 
H18A C18 H18B 107.7 . . ? 
C18 C19 N5 113.0(8) . . ? 
C18 C19 H19A 109.0 . . ? 
N5 C19 H19A 109.0 . . ? 
C18 C19 H19B 109.0 . . ? 
N5 C19 H19B 109.0 . . ? 
H19A C19 H19B 107.8 . . ? 
N5 C20 C21 112.0(8) . . ? 
N5 C20 H20A 109.2 . . ? 
C21 C20 H20A 109.2 . . ? 
N5 C20 H20B 109.2 . . ? 
C21 C20 H20B 109.2 . . ? 
H20A C20 H20B 107.9 . . ? 
C20 C21 N3 113.7(7) . . ? 
C20 C21 H21A 108.8 . . ? 
N3 C21 H21A 108.8 . . ? 
C20 C21 H21B 108.8 . . ? 
N3 C21 H21B 108.8 . . ? 
H21A C21 H21B 107.7 . . ? 
O5 N7 O4 118.6(7) . . ? 
O5 N7 O3 119.2(7) . . ? 
O4 N7 O3 122.3(7) . . ? 
O8 N8 O7 121.0(7) . . ? 
O8 N8 O6 119.1(8) . . ? 
O7 N8 O6 119.7(7) . . ? 
O11 N9 O9 121.1(11) . . ? 
O11 N9 O10 119.2(11) . . ? 
O9 N9 O10 119.6(11) . . ? 
O13 N10 O12 123.7(10) . . ? 
O13 N10 O14 111.9(11) . . ? 
O12 N10 O14 123.5(10) . . ? 
N7 O4 Cu2 124.0(5) . . ? 
H4W O2W H3W 118(10) . . ? 
H5W O3W H6W 98(11) . . ? 
 
_diffrn_measured_fraction_theta_max    0.997 
_diffrn_reflns_theta_full              23.65 
_diffrn_measured_fraction_theta_full   0.997 
_refine_diff_density_max    0.492 
_refine_diff_density_min   -0.271 
_refine_diff_density_rms    0.068 
